# Supplementary material for: Computational exploration of the electrochemical oxidation mechanism of thiocyanate catalyzed by cobalt-phthalocyanines
Source: Royal Society of Chemistry journal article supplement (doi:10.1039/d4cp04256e), 2025-01-01
Supplement: d4cp04256e1.pdf [file d4cp04256e1.pdf]

Supplementary information for

**Computational Exploration of the Electrochemical Oxidation  
Mechanism of Thiocyanate Catalyzed by Cobalt-Phthalocyanines**

*Sebastián Miranda-Rojas<sup>1,2\*</sup>, Néstor Gutiérrez-Sánchez,<sup>1</sup> Carlos Orellana<sup>3</sup>, Kevin Blanco-  
Esperguez,<sup>1</sup> Sasha Gazzari-Jara,<sup>4</sup> Paulina Sierra-Rosales,<sup>5</sup> and Fernando Mendizábal<sup>3\*</sup>*

<sup>1</sup>Departamento de Ciencias Químicas, Facultad de Ciencias Exactas, Universidad Andres Bello, Avenida República 275, Santiago, Chile.

<sup>2</sup>Universidad Andres Bello, Centro de Química Teórica & Computacional (CQT&C), Facultad de Ciencias Exactas, Departamento de Ciencias Químicas, Avenida República 275, 8370146, Santiago de Chile, Chile.

<sup>3</sup>Departamento de Química, Facultad de Ciencias, Universidad de Chile, P.O. Box 653, Las Palmeras 3425, Ñuñoa, Santiago, Chile.

<sup>4</sup>Departamento de Química Física, Pontificia Universidad Católica de Chile, Avenida Vicuña Mackenna 4860, Macul, Santiago, Chile.

<sup>5</sup>Instituto Universitario de Investigación y Desarrollo Tecnológico (IDT), Universidad Tecnológica Metropolitana, Ignacio Valdivieso 2409, San Joaquín, Santiago, Chile

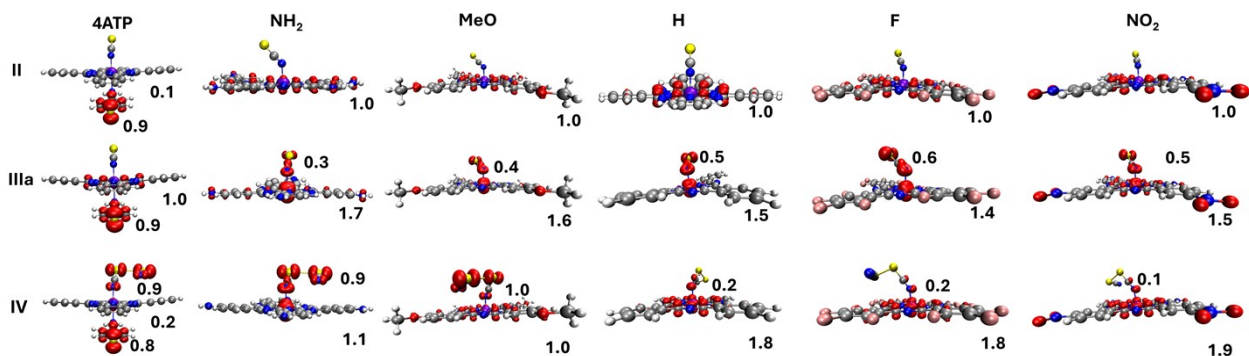

**Figure S1.** Graphical representation of the spin density evolution along the reaction mechanism for the open shell intermediate states (II, IIIa, and IV) considering the complexes formed through the Co–N binding mode (spin densities are represented by the red isosurface).

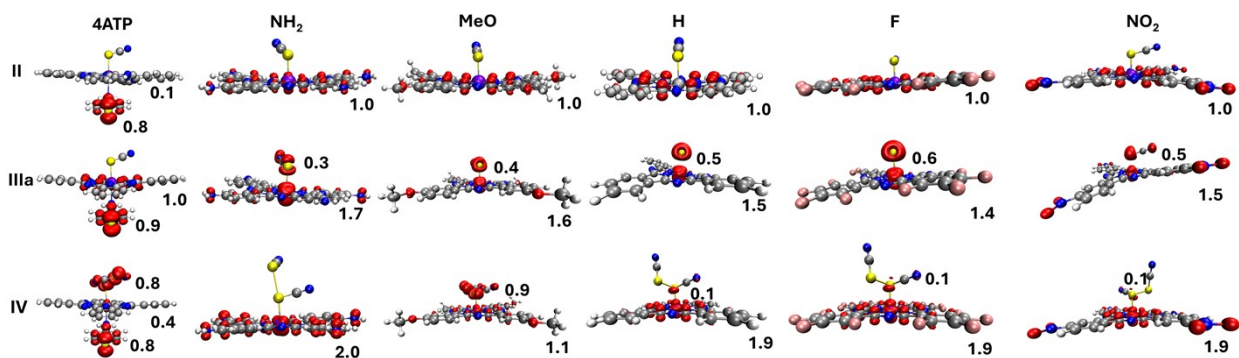

**Figure S2.** Graphical representation of the spin density evolution along the reaction mechanism for the open shell intermediate states (II, IIIa, and IV) considering the complexes formed through the Co–S binding mode (spin densities are represented by the red isosurface).

After the first electron-oxidation process (**II**) for both, Co–N and Co–S binding modes (Figures S1 and S2), the unpaired electron is delocalized along the Pc moiety, with exception of the 4ATP-CoPc complex, where it is delocalized at the 4ATP ligand, explaining the differences in the oxidation potential behavior of this system with respect to the rest of the series. The second oxidation to form **IIIa** for the case of the triplet state, leads to the activation of the system towards

the dimerization process by localizing the unpaired electron at the  $\text{SCN}^\bullet$ . The addition of the second  $\text{SCN}^-$  molecule to generate **IV** shows that for the systems for which the S–S bond is formed, corresponding to complexes formed by the Co–N binding mode ( $\text{R} = \text{H}, \text{F}, \text{NO}_2$ ), the spin density is delocalized in the Pc moiety. Meanwhile, for the complexes where no S–S bond is formed, the spin density is mainly localized in the  $(\text{SCN})_2^{\bullet-}$ , denoting the radical nature of the dimer intermediate. According to these results, to form the  $(\text{SCN})_2$  dimer, the system has to be capable of transferring the unpaired electron to the macrocycle after the addition of the second  $\text{SCN}^-$  molecule, which is only viable by electron-withdrawing groups, and in a minor extent, by the system without substituents. When electron-donor functionalization is used on the CoPc system, it is not possible to generate the  $(\text{SCN})_2$  dimer, as it is not possible to transfer the unpaired electron to the macrocycle, which seems to be a requisite to form the S–S bond.

**Binding mode Co-SCN (all energies are in hartree)**

**4-ATP - Stage I**

E = -4225.36673164

G = -4224.915671

|    |           |           |           |
|----|-----------|-----------|-----------|
| S  | -2.894592 | 1.152947  | -1.169993 |
| C  | -4.065275 | 0.856012  | -0.017497 |
| N  | -4.919380 | 0.651144  | 0.788415  |
| Co | -0.879536 | 0.529320  | -0.052894 |
| C  | -2.047076 | -1.980152 | 1.033051  |
| C  | -2.289624 | -3.378948 | 0.679080  |
| C  | -1.817161 | -3.539163 | -0.646392 |
| C  | -1.278273 | -2.241188 | -1.049596 |
| N  | -1.435671 | -1.327065 | -0.022481 |
| C  | -1.752325 | 1.994712  | 2.377446  |
| C  | -2.451010 | 1.796131  | 3.646225  |
| C  | -2.749693 | 0.413797  | 3.723222  |
| C  | -2.246092 | -0.184199 | 2.488098  |
| N  | -1.645182 | 0.788464  | 1.705605  |
| C  | 0.416944  | 3.003332  | -1.087773 |
| C  | 0.604273  | 4.417381  | -0.765549 |
| C  | -0.055224 | 4.634587  | 0.469086  |
| C  | -0.612727 | 3.343196  | 0.868385  |

|   |           |           |           |
|---|-----------|-----------|-----------|
| N | -0.309607 | 2.384459  | -0.084643 |
| C | -0.087825 | -0.914317 | -2.533126 |
| C | 0.722316  | -0.759950 | -3.739962 |
| C | 1.194742  | 0.574863  | -3.733319 |
| C | 0.655898  | 1.193347  | -2.522013 |
| N | -0.091537 | 0.268525  | -1.813531 |
| N | -0.679289 | -2.057785 | -2.217791 |
| N | -2.404914 | -1.470096 | 2.204305  |
| N | -1.288843 | 3.178138  | 1.997426  |
| N | 0.884890  | 2.460893  | -2.205524 |
| C | -0.074828 | 5.903959  | 1.070750  |
| C | 2.053874  | 1.047610  | -4.737613 |
| C | 1.106409  | -1.665219 | -4.741223 |
| C | -1.887023 | -4.779953 | -1.300370 |
| C | -2.855180 | -4.453310 | 1.385106  |
| C | -3.422911 | -0.125499 | 4.831676  |
| C | -2.814096 | 2.678017  | 4.677668  |
| C | 1.261916  | 5.463509  | -1.433949 |
| C | 1.242573  | 6.733846  | -0.832414 |
| H | 1.748193  | 7.577030  | -1.328184 |
| C | 0.582844  | 6.951203  | 0.402365  |
| C | 2.433488  | 0.143771  | -5.746679 |
| C | 1.969468  | -1.193795 | -5.746274 |

|   |           |           |           |
|---|-----------|-----------|-----------|
| H | 2.298258  | -1.877986 | -6.543826 |
| C | -2.452731 | -5.856137 | -0.594286 |
| C | -2.930651 | -5.694799 | 0.729377  |
| H | -3.366881 | -6.559589 | 1.253072  |
| C | -3.487548 | 2.138995  | 5.787594  |
| H | -3.789261 | 2.801376  | 6.613823  |
| C | -3.787365 | 0.756508  | 5.863814  |
| H | 1.773393  | 5.292807  | -2.393032 |
| H | -0.587820 | 6.071133  | 2.029668  |
| H | 2.425765  | 2.082992  | -4.728440 |
| H | 0.760389  | -2.708749 | -4.727651 |
| H | -1.511578 | -4.902855 | -2.327183 |
| H | -3.221833 | -4.327751 | 2.414838  |
| H | 3.110598  | 0.478376  | -6.547976 |
| H | 0.586684  | 7.959702  | 0.844318  |
| H | -2.525686 | -6.843466 | -1.076216 |
| H | -3.656204 | -1.199221 | 4.888087  |
| H | -4.316173 | 0.368439  | 6.748228  |
| H | -2.581596 | 3.751676  | 4.616423  |
| C | 1.517911  | -2.313877 | 0.308866  |
| C | 2.149593  | -3.205444 | -0.555108 |
| C | 3.014467  | -2.759935 | -1.612554 |
| C | 3.277052  | -1.347374 | -1.658515 |

|   |          |           |           |
|---|----------|-----------|-----------|
| C | 2.656724 | -0.454355 | -0.790537 |
| S | 3.676262 | -3.849676 | -2.778577 |
| H | 0.824519 | -2.683081 | 1.081426  |
| H | 1.957341 | -4.285846 | -0.460585 |
| H | 3.964899 | -0.970105 | -2.431340 |
| H | 2.846401 | 0.627575  | -0.873546 |
| C | 1.736801 | -0.920647 | 0.180024  |
| N | 0.929366 | -0.002319 | 0.884476  |
| H | 0.604279 | -0.359565 | 1.793908  |
| H | 1.377860 | 0.915266  | 1.018291  |

#### **4-ATP - Stage II**

E = -4225.208924

G = -4224.758244

|    |           |           |           |
|----|-----------|-----------|-----------|
| S  | -2.849785 | 1.100068  | -1.084042 |
| C  | -4.053800 | 0.481982  | -0.097851 |
| N  | -4.939331 | 0.058554  | 0.572929  |
| Co | -0.925576 | 0.429244  | -0.020008 |
| C  | -2.175586 | -2.027016 | 1.096252  |
| C  | -2.524344 | -3.399521 | 0.732376  |
| C  | -2.092937 | -3.579584 | -0.604437 |

|   |           |           |           |
|---|-----------|-----------|-----------|
| C | -1.461924 | -2.323668 | -1.006105 |
| N | -1.538467 | -1.409536 | 0.032416  |
| C | -1.735646 | 1.948915  | 2.398582  |
| C | -2.399265 | 1.776389  | 3.689349  |
| C | -2.726731 | 0.402060  | 3.789394  |
| C | -2.276473 | -0.220283 | 2.546328  |
| N | -1.677855 | 0.732460  | 1.738259  |
| C | 0.416489  | 2.860386  | -1.108381 |
| C | 0.619418  | 4.277882  | -0.816986 |
| C | -0.030031 | 4.528617  | 0.416593  |
| C | -0.598515 | 3.253357  | 0.848940  |
| N | -0.312599 | 2.273140  | -0.087028 |
| C | -0.196679 | -1.066866 | -2.487137 |
| C | 0.667618  | -0.971956 | -3.661638 |
| C | 1.200752  | 0.341326  | -3.659812 |
| C | 0.636919  | 1.012569  | -2.492695 |
| N | -0.154875 | 0.123142  | -1.781060 |
| N | -0.855776 | -2.173647 | -2.174829 |
| N | -2.479598 | -1.502487 | 2.275246  |
| N | -1.258246 | 3.116712  | 1.991300  |
| N | 0.880520  | 2.283849  | -2.209264 |
| C | -0.030897 | 5.809786  | 0.992442  |
| C | 2.156783  | 0.742839  | -4.606504 |



|   |           |           |           |
|---|-----------|-----------|-----------|
| C | 1.077088  | -1.923505 | -4.605875 |
| C | -2.280351 | -4.800212 | -1.273179 |
| C | -3.162425 | -4.432676 | 1.437784  |
| C | -3.376815 | -0.112251 | 4.923077  |
| C | -2.708911 | 2.676325  | 4.722466  |
| C | 1.285716  | 5.300949  | -1.511673 |
| C | 1.283618  | 6.583432  | -0.936768 |
| H | 1.795388  | 7.410281  | -1.453059 |
| C | 0.634177  | 6.834320  | 0.297088  |
| C | 2.580045  | -0.213559 | -5.543250 |
| C | 2.050506  | -1.529133 | -5.541447 |
| H | 2.410856  | -2.254016 | -6.287066 |
| C | -2.919881 | -5.834542 | -0.568220 |
| C | -3.354282 | -5.653466 | 0.767840  |
| H | -3.850864 | -6.486203 | 1.289461  |
| C | -3.358071 | 2.162144  | 5.858052  |
| H | -3.617753 | 2.838285  | 6.687250  |
| C | -3.686878 | 0.787723  | 5.957177  |
| H | 1.789857  | 5.103868  | -2.469407 |
| H | -0.535418 | 6.002919  | 1.950801  |
| H | 2.577667  | 1.758892  | -4.594626 |
| H | 0.677497  | -2.947932 | -4.594094 |
| H | -1.941299 | -4.938790 | -2.310496 |

|   |           |           |           |
|---|-----------|-----------|-----------|
| H | -3.497702 | -4.291000 | 2.475896  |
| H | 3.344789  | 0.055476  | -6.287728 |
| H | 0.652118  | 7.851921  | 0.717019  |
| H | -3.087432 | -6.804436 | -1.061624 |
| H | -3.632504 | -1.179634 | 4.997211  |
| H | -4.195633 | 0.420250  | 6.861792  |
| H | -2.454240 | 3.743609  | 4.643237  |
| C | 1.740859  | -2.079478 | -0.203674 |
| C | 2.543938  | -2.593400 | -1.216139 |
| C | 3.452834  | -1.753310 | -1.940102 |
| C | 3.564364  | -0.383001 | -1.535559 |
| C | 2.754728  | 0.133820  | -0.529915 |
| S | 4.354890  | -2.363130 | -3.273200 |
| H | 1.028040  | -2.725442 | 0.330537  |
| H | 2.469781  | -3.655082 | -1.494096 |
| H | 4.281284  | 0.267137  | -2.058113 |
| H | 2.812169  | 1.196995  | -0.251358 |
| C | 1.805904  | -0.699897 | 0.108960  |
| N | 0.836546  | -0.128800 | 0.965920  |
| H | 0.512447  | -0.780198 | 1.696517  |
| H | 1.155955  | 0.747653  | 1.405930  |

#### **4-ATP - Stage III-a**

E = -4225.020580

G = -4224.568346

|    |           |           |           |
|----|-----------|-----------|-----------|
| S  | -2.855606 | 1.082102  | -1.065374 |
| C  | -4.044016 | 0.265300  | -0.214768 |
| N  | -4.912778 | -0.300162 | 0.366441  |
| Co | -0.927020 | 0.391067  | -0.010573 |
| C  | -2.238502 | -2.029549 | 1.098575  |
| C  | -2.666325 | -3.376569 | 0.714636  |
| C  | -2.227938 | -3.568904 | -0.615571 |
| C  | -1.514252 | -2.347406 | -0.993564 |
| N  | -1.556125 | -1.435965 | 0.051311  |
| C  | -1.683977 | 1.918117  | 2.414858  |
| C  | -2.298170 | 1.746904  | 3.733665  |
| C  | -2.653907 | 0.382433  | 3.832443  |
| C  | -2.266071 | -0.236894 | 2.563309  |
| N  | -1.674616 | 0.709299  | 1.740955  |
| C  | 0.372712  | 2.819799  | -1.144425 |
| C  | 0.537683  | 4.251661  | -0.887111 |
| C  | -0.082055 | 4.505368  | 0.357953  |
| C  | -0.601744 | 3.219338  | 0.828380  |
| N  | -0.317983 | 2.229858  | -0.096909 |

|   |           |           |           |
|---|-----------|-----------|-----------|
| C | -0.181449 | -1.134434 | -2.447924 |
| C | 0.716686  | -1.065466 | -3.599530 |
| C | 1.243257  | 0.250231  | -3.615197 |
| C | 0.640887  | 0.946325  | -2.478866 |
| N | -0.158024 | 0.068795  | -1.762649 |
| N | -0.873056 | -2.224625 | -2.145194 |
| N | -2.511960 | -1.508807 | 2.287457  |
| N | -1.220418 | 3.086263  | 1.993394  |
| N | 0.850787  | 2.231726  | -2.230949 |
| C | -0.104944 | 5.790549  | 0.914335  |
| C | 2.217936  | 0.637057  | -4.541104 |
| C | 1.149883  | -2.037911 | -4.507144 |
| C | -2.476340 | -4.764561 | -1.301364 |
| C | -3.372469 | -4.371103 | 1.402661  |
| C | -3.273955 | -0.130522 | 4.978511  |
| C | -2.548227 | 2.644854  | 4.779001  |
| C | 1.156581  | 5.273866  | -1.617786 |
| C | 1.131698  | 6.570291  | -1.063569 |
| H | 1.605041  | 7.400558  | -1.609367 |
| C | 0.511780  | 6.824058  | 0.179346  |
| C | 2.677566  | -0.346519 | -5.441220 |
| C | 2.152314  | -1.661424 | -5.424815 |
| H | 2.534563  | -2.401702 | -6.143173 |

|   |           |           |           |
|---|-----------|-----------|-----------|
| C | -3.192112 | -5.766753 | -0.614454 |
| C | -3.631474 | -5.573838 | 0.713362  |
| H | -4.185965 | -6.378307 | 1.219994  |
| C | -3.168559 | 2.131934  | 5.937026  |
| H | -3.381169 | 2.806726  | 6.780102  |
| C | -3.524344 | 0.769286  | 6.035236  |
| H | 1.641977  | 5.073431  | -2.584065 |
| H | -0.585626 | 5.986124  | 1.883969  |
| H | 2.632569  | 1.655132  | -4.545825 |
| H | 0.748895  | -3.061253 | -4.485989 |
| H | -2.130303 | -4.914370 | -2.334433 |
| H | -3.710749 | -4.220504 | 2.438149  |
| H | 3.458730  | -0.089167 | -6.171713 |
| H | 0.510999  | 7.848312  | 0.582090  |
| H | -3.412251 | -6.717997 | -1.122476 |
| H | -3.554210 | -1.191417 | 5.051428  |
| H | -4.008154 | 0.403109  | 6.953475  |
| H | -2.274394 | 3.706928  | 4.699178  |
| C | 1.880577  | -1.978103 | -0.306104 |
| C | 2.735858  | -2.365362 | -1.331348 |
| C | 3.614524  | -1.417493 | -1.951863 |
| C | 3.648795  | -0.082493 | -1.431120 |
| C | 2.788543  | 0.304384  | -0.409820 |

|   |          |           |           |
|---|----------|-----------|-----------|
| S | 4.559854 | -1.853569 | -3.319689 |
| H | 1.189934 | -2.702788 | 0.150558  |
| H | 2.724671 | -3.402375 | -1.697261 |
| H | 4.343960 | 0.645324  | -1.874422 |
| H | 2.786387 | 1.339975  | -0.037650 |
| C | 1.864278 | -0.627408 | 0.121722  |
| N | 0.840652 | -0.181671 | 0.987277  |
| H | 0.523532 | -0.917164 | 1.637809  |
| H | 1.103291 | 0.659690  | 1.523747  |

#### 4-ATP - Stage III-b

E = -4225.022492

G = -4224.567891

|    |           |           |           |
|----|-----------|-----------|-----------|
| S  | -2.878399 | 1.147189  | -1.009525 |
| C  | -4.050341 | 0.039717  | -0.556855 |
| N  | -4.912152 | -0.721249 | -0.255780 |
| Co | -0.974314 | 0.351180  | -0.012612 |
| C  | -2.361169 | -2.026052 | 1.092436  |
| C  | -2.789658 | -3.377392 | 0.729473  |
| C  | -2.294851 | -3.614891 | -0.573626 |
| C  | -1.564973 | -2.408735 | -0.962433 |

|   |           |           |           |
|---|-----------|-----------|-----------|
| N | -1.638542 | -1.464721 | 0.063744  |
| C | -1.618338 | 1.879807  | 2.443706  |
| C | -2.239534 | 1.728429  | 3.762372  |
| C | -2.694707 | 0.392086  | 3.837100  |
| C | -2.349425 | -0.232622 | 2.559231  |
| N | -1.693837 | 0.689416  | 1.749684  |
| C | 0.342802  | 2.763628  | -1.181969 |
| C | 0.577448  | 4.181000  | -0.900957 |
| C | 0.050093  | 4.424237  | 0.388313  |
| C | -0.505038 | 3.152595  | 0.853993  |
| N | -0.312831 | 2.174779  | -0.106622 |
| C | -0.238292 | -1.213729 | -2.442454 |
| C | 0.644134  | -1.168007 | -3.576132 |
| C | 1.153810  | 0.164868  | -3.638326 |
| C | 0.538417  | 0.889033  | -2.520570 |
| N | -0.220661 | 0.018003  | -1.777636 |
| N | -0.910270 | -2.308879 | -2.100655 |
| N | -2.658028 | -1.482700 | 2.270953  |
| N | -1.087079 | 3.025185  | 2.037994  |
| N | 0.751108  | 2.180684  | -2.295121 |
| C | 0.119753  | 5.694263  | 0.979033  |
| C | 2.169503  | 0.506510  | -4.520166 |
| C | 1.123239  | -2.191857 | -4.426840 |

|   |           |           |           |
|---|-----------|-----------|-----------|
| C | -2.526401 | -4.831009 | -1.232590 |
| C | -3.532398 | -4.346785 | 1.417894  |
| C | -3.347363 | -0.095843 | 4.977881  |
| C | -2.419398 | 2.621829  | 4.826767  |
| C | 1.196066  | 5.197988  | -1.641330 |
| C | 1.264986  | 6.474894  | -1.052237 |
| H | 1.740151  | 7.300384  | -1.603978 |
| C | 0.735548  | 6.719031  | 0.236175  |
| C | 2.746447  | -0.556572 | -5.286992 |
| C | 2.179325  | -1.875890 | -5.274707 |
| H | 2.620564  | -2.644129 | -5.926000 |
| C | -3.276655 | -5.804488 | -0.546731 |
| C | -3.770960 | -5.566589 | 0.756888  |
| H | -4.353386 | -6.351582 | 1.263075  |
| C | -3.072384 | 2.134356  | 5.975823  |
| H | -3.232485 | 2.806472  | 6.832724  |
| C | -3.528526 | 0.798497  | 6.050316  |
| H | 1.608992  | 5.005933  | -2.642430 |
| H | -0.290132 | 5.880667  | 1.982435  |
| H | 2.584439  | 1.523084  | -4.569850 |
| H | 0.703882  | -3.206777 | -4.380489 |
| H | -2.139253 | -5.014815 | -2.245510 |
| H | -3.914302 | -4.160484 | 2.432216  |



|   |           |           |           |
|---|-----------|-----------|-----------|
| H | 3.513873  | -0.314192 | -6.038348 |
| H | 0.808428  | 7.730123  | 0.665109  |
| H | -3.483275 | -6.770241 | -1.032870 |
| H | -3.703147 | -1.135058 | 5.032172  |
| H | -4.035439 | 0.452516  | 6.964039  |
| H | -2.066396 | 3.661634  | 4.766645  |
| C | 2.030205  | -1.793253 | -0.497263 |
| C | 2.910959  | -1.947983 | -1.563864 |
| C | 3.636777  | -0.822747 | -2.072034 |
| C | 3.533465  | 0.429238  | -1.379438 |
| C | 2.680534  | 0.573949  | -0.294987 |
| S | 4.541233  | -0.917194 | -3.532090 |
| H | 1.420909  | -2.637806 | -0.141744 |
| H | 3.020622  | -2.924980 | -2.056263 |
| H | 4.118407  | 1.287179  | -1.741662 |
| H | 2.583600  | 1.541021  | 0.220626  |
| C | 1.861546  | -0.515998 | 0.094424  |
| N | 0.797246  | -0.280273 | 0.984206  |
| H | 0.493942  | -1.120024 | 1.500702  |
| H | 0.978046  | 0.495763  | 1.639515  |

#### **4-ATP - Stage IV**

E = -4716.085907

G = -4715.632820

S -3.008538 1.169375 -0.841736

C -4.173484 0.223066 -0.093898

N -5.024134 -0.425016 0.419412

Co -1.056844 0.406647 0.046669

C -2.310793 -2.035900 1.198005

C -2.699904 -3.398068 0.837101

C -2.275188 -3.594086 -0.499006

C -1.621007 -2.353744 -0.910567

N -1.677264 -1.431162 0.122315

C -1.689841 1.908341 2.532679

C -2.278947 1.730654 3.858160

C -2.657103 0.368928 3.948916

C -2.304203 -0.243765 2.669959

N -1.718779 0.703383 1.846808

C 0.216572 2.847207 -1.112317

C 0.453202 4.258312 -0.816942

C -0.078927 4.491793 0.474532

C -0.626431 3.216247 0.932111

N -0.434465 2.250164 -0.042341

C -0.404183 -1.103895 -2.435541

|   |           |           |           |
|---|-----------|-----------|-----------|
| C | 0.420576  | -1.008457 | -3.635589 |
| C | 0.924898  | 0.315592  | -3.671239 |
| C | 0.375782  | 0.996896  | -2.500047 |
| N | -0.364299 | 0.101061  | -1.747329 |
| N | -1.019549 | -2.221594 | -2.082799 |
| N | -2.562539 | -1.514023 | 2.389376  |
| N | -1.202151 | 3.069030  | 2.117195  |
| N | 0.610775  | 2.275399  | -2.239921 |
| C | -0.012783 | 5.761003  | 1.071617  |
| C | 1.836016  | 0.723245  | -4.652481 |
| C | 0.814359  | -1.967170 | -4.579677 |
| C | -2.497679 | -4.809521 | -1.165392 |
| C | -3.362221 | -4.411384 | 1.547783  |
| C | -3.259517 | -0.145440 | 5.108072  |
| C | -2.489584 | 2.618760  | 4.925343  |
| C | 1.068534  | 5.285718  | -1.550065 |
| C | 1.133616  | 6.557015  | -0.953730 |
| H | 1.607584  | 7.387934  | -1.498586 |
| C | 0.600691  | 6.791054  | 0.337437  |
| C | 2.255788  | -0.243943 | -5.583382 |
| C | 1.750480  | -1.569409 | -5.549065 |
| H | 2.104019  | -2.297281 | -6.294815 |
| C | -3.164286 | -5.824025 | -0.456029 |

|   |           |           |           |
|---|-----------|-----------|-----------|
| C | -3.589588 | -5.627968 | 0.880349  |
| H | -4.108561 | -6.445012 | 1.404820  |
| C | -3.091491 | 2.104461  | 6.087039  |
| H | -3.273624 | 2.771297  | 6.943858  |
| C | -3.470432 | 0.742911  | 6.177202  |
| H | 1.482273  | 5.101191  | -2.552428 |
| H | -0.425918 | 5.940892  | 2.075079  |
| H | 2.233177  | 1.748264  | -4.673204 |
| H | 0.429546  | -2.996515 | -4.541688 |
| H | -2.165689 | -4.959042 | -2.203369 |
| H | -3.691619 | -4.257858 | 2.585971  |
| H | 2.989638  | 0.029770  | -6.356386 |
| H | 0.669752  | 7.799947  | 0.772613  |
| H | -3.360518 | -6.789717 | -0.946917 |
| H | -3.554634 | -1.202920 | 5.175596  |
| H | -3.939862 | 0.375339  | 7.102679  |
| H | -2.196243 | 3.676409  | 4.852864  |
| C | 1.786106  | -1.906154 | -0.424376 |
| C | 2.623467  | -2.248583 | -1.479648 |
| C | 3.458718  | -1.266801 | -2.108910 |
| C | 3.460803  | 0.060098  | -1.564570 |
| C | 2.622881  | 0.403172  | -0.509157 |
| S | 4.404744  | -1.658743 | -3.489986 |

|   |           |           |           |
|---|-----------|-----------|-----------|
| H | 1.125744  | -2.656381 | 0.036190  |
| H | 2.633984  | -3.278707 | -1.864813 |
| H | 4.119851  | 0.816280  | -2.015651 |
| H | 2.605699  | 1.430512  | -0.114981 |
| C | 1.744993  | -0.566032 | 0.032905  |
| N | 0.738654  | -0.168400 | 0.943508  |
| H | 0.449534  | -0.930414 | 1.576146  |
| H | 1.001031  | 0.659384  | 1.500745  |
| S | -3.522107 | -0.096584 | -3.470045 |
| C | -2.489388 | 0.924930  | -4.255848 |
| N | -1.751838 | 1.670251  | -4.829680 |

#### 4-ATP - Stage V

E = -4716.074757

G = -4715.617535

|    |           |           |           |
|----|-----------|-----------|-----------|
| S  | -3.096150 | 1.013645  | -0.841577 |
| C  | -4.151441 | 0.271723  | 0.233368  |
| N  | -4.952810 | -0.227239 | 0.956048  |
| Co | -1.061079 | 0.413884  | 0.035790  |
| C  | -2.139480 | -2.077651 | 1.234204  |
| C  | -2.529086 | -3.442879 | 0.876810  |

|   |           |           |           |
|---|-----------|-----------|-----------|
| C | -2.269271 | -3.582432 | -0.507687 |
| C | -1.674716 | -2.318438 | -0.944591 |
| N | -1.623911 | -1.433957 | 0.122786  |
| C | -1.780234 | 1.916728  | 2.485667  |
| C | -2.346263 | 1.723434  | 3.820502  |
| C | -2.569712 | 0.332823  | 3.962174  |
| C | -2.168991 | -0.280782 | 2.695163  |
| N | -1.684474 | 0.690215  | 1.839967  |
| C | 0.222621  | 2.851409  | -1.097837 |
| C | 0.398912  | 4.276081  | -0.822266 |
| C | -0.259633 | 4.529780  | 0.405056  |
| C | -0.789614 | 3.244110  | 0.860353  |
| N | -0.501534 | 2.263670  | -0.064899 |
| C | -0.514295 | -1.042430 | -2.485028 |
| C | 0.373949  | -0.977162 | -3.655938 |
| C | 0.936843  | 0.343823  | -3.648099 |
| C | 0.404320  | 1.008530  | -2.484976 |
| N | -0.403272 | 0.122098  | -1.765900 |
| N | -1.176278 | -2.145766 | -2.157871 |
| N | -2.334655 | -1.574373 | 2.444838  |
| N | -1.399254 | 3.099593  | 2.034093  |
| N | 0.693619  | 2.268771  | -2.183847 |
| C | -0.292916 | 5.817268  | 0.962385  |

|   |           |           |           |
|---|-----------|-----------|-----------|
| C | 1.938148  | 0.727920  | -4.563886 |
| C | 0.840206  | -1.955638 | -4.521076 |
| C | -2.546017 | -4.779194 | -1.185161 |
| C | -3.082466 | -4.493104 | 1.624559  |
| C | -3.105885 | -0.203487 | 5.142163  |
| C | -2.647708 | 2.620213  | 4.857008  |
| C | 1.038427  | 5.303163  | -1.533285 |
| C | 1.002889  | 6.594928  | -0.978008 |
| H | 1.493948  | 7.426131  | -1.507046 |
| C | 0.346823  | 6.848102  | 0.250433  |
| C | 2.437584  | -0.259791 | -5.410157 |
| C | 1.936411  | -1.607696 | -5.357455 |
| H | 2.303053  | -2.338113 | -6.094328 |
| C | -3.102193 | -5.833154 | -0.437259 |
| C | -3.365452 | -5.692607 | 0.945969  |
| H | -3.799933 | -6.539001 | 1.499802  |
| C | -3.184022 | 2.084337  | 6.041901  |
| H | -3.435357 | 2.757209  | 6.876121  |
| C | -3.408800 | 0.694277  | 6.182468  |
| H | 1.547648  | 5.103724  | -2.487702 |
| H | -0.803567 | 6.012678  | 1.916881  |
| H | 2.343839  | 1.749115  | -4.564659 |
| H | 0.440767  | -2.979242 | -4.509808 |

|   |           |           |           |
|---|-----------|-----------|-----------|
| H | -2.340083 | -4.886425 | -2.260380 |
| H | -3.285397 | -4.382305 | 2.699930  |
| H | 3.246620  | -0.027291 | -6.117648 |
| H | 0.337595  | 7.872190  | 0.654305  |
| H | -3.338149 | -6.785734 | -0.936158 |
| H | -3.282759 | -1.283840 | 5.248858  |
| H | -3.830404 | 0.309824  | 7.123936  |
| H | -2.474011 | 3.700551  | 4.744527  |
| C | 1.580654  | -2.016031 | -0.423769 |
| C | 2.255594  | -2.497445 | -1.537178 |
| C | 3.142160  | -1.653197 | -2.287501 |
| C | 3.358413  | -0.315808 | -1.821072 |
| C | 2.655993  | 0.175339  | -0.724221 |
| S | 3.876487  | -2.231597 | -3.728452 |
| H | 0.895571  | -2.664543 | 0.141655  |
| H | 2.107350  | -3.536001 | -1.867185 |
| H | 4.067141  | 0.329397  | -2.359949 |
| H | 2.783120  | 1.217352  | -0.394956 |
| C | 1.717266  | -0.652022 | -0.060710 |
| N | 0.826941  | -0.102647 | 0.884420  |
| H | 0.566736  | -0.768937 | 1.627537  |
| H | 1.164438  | 0.777269  | 1.303420  |
| S | -2.049400 | 0.516017  | -4.953159 |



|   |           |          |           |
|---|-----------|----------|-----------|
| C | -2.139041 | 1.837171 | -3.972312 |
| N | -2.195043 | 2.801680 | -3.263194 |

**NH<sub>2</sub> - Stage I**

E = -3761.574596

G = -3761.167950

|    |           |           |           |
|----|-----------|-----------|-----------|
| S  | -1.919256 | 0.645052  | -0.735458 |
| C  | -1.959495 | 2.251000  | -0.258486 |
| N  | -2.036557 | 3.394223  | 0.060321  |
| Co | 0.072567  | -0.081258 | 0.004862  |
| C  | -0.193604 | 1.218273  | 2.685396  |
| C  | -0.757429 | 0.990918  | 3.999155  |
| C  | -1.362096 | -0.291076 | 3.966294  |
| C  | -1.122430 | -0.818423 | 2.620895  |
| N  | -0.398142 | 0.090791  | 1.873982  |
| C  | 1.443549  | 2.347117  | -1.038311 |
| C  | 1.766303  | 3.706344  | -0.665882 |
| C  | 1.403731  | 3.852975  | 0.697627  |
| C  | 0.856989  | 2.559746  | 1.112125  |
| N  | 0.909687  | 1.659838  | 0.063949  |
| C  | 0.598873  | -1.494528 | -2.578789 |

|   |           |           |           |
|---|-----------|-----------|-----------|
| C | 1.170027  | -1.271791 | -3.889886 |
| C | 1.638162  | 0.066592  | -3.907905 |
| C | 1.351494  | 0.613831  | -2.579625 |
| N | 0.756060  | -0.347163 | -1.785310 |
| C | -1.288264 | -2.526746 | 1.056159  |
| C | -1.693754 | -3.857121 | 0.656531  |
| C | -1.234286 | -4.041856 | -0.672474 |
| C | -0.555687 | -2.797983 | -1.043556 |
| N | -0.584011 | -1.906703 | 0.012010  |
| N | -1.547277 | -2.021649 | 2.252368  |
| N | 0.390505  | 2.353909  | 2.338231  |
| N | 1.652900  | 1.864997  | -2.254090 |
| N | -0.002384 | -2.624729 | -2.238384 |
| C | 2.245147  | 0.628375  | -5.031780 |
| C | -1.434310 | -5.233423 | -1.370958 |
| C | -2.381471 | -4.896413 | 1.317339  |
| C | -2.011403 | -0.836909 | 5.074714  |
| C | -0.807859 | 1.766274  | 5.176035  |
| C | 1.582717  | 5.050401  | 1.391040  |
| C | 2.327272  | 4.792729  | -1.369741 |
| C | 1.305985  | -2.083694 | -5.035181 |
| C | 1.908077  | -1.539200 | -6.169340 |
| H | 2.025867  | -2.149923 | -7.078427 |

|   |           |           |           |
|---|-----------|-----------|-----------|
| C | 2.387600  | -0.184957 | -6.194359 |
| C | -2.129433 | -6.289042 | -0.711234 |
| C | -2.595378 | -6.092999 | 0.633722  |
| H | -3.131838 | -6.920669 | 1.124040  |
| C | -2.063087 | -0.062839 | 6.270613  |
| C | -1.455442 | 1.238851  | 6.293340  |
| H | -1.511105 | 1.823523  | 7.225221  |
| C | 2.506712  | 5.999791  | -0.695679 |
| H | 2.934703  | 6.867853  | -1.221623 |
| C | 2.143536  | 6.155328  | 0.686424  |
| H | 0.945433  | -3.123454 | -5.040127 |
| H | 2.602757  | 1.669131  | -5.034758 |
| H | -1.070359 | -5.366883 | -2.400924 |
| H | -2.744092 | -4.770977 | 2.348836  |
| H | -2.476783 | -1.833503 | 5.037487  |
| H | -0.349700 | 2.766069  | 5.217269  |
| H | 1.294387  | 5.153746  | 2.448026  |
| H | 2.611731  | 4.696925  | -2.428515 |
| N | -2.660824 | -0.557352 | 7.394266  |
| H | -2.835832 | 0.061509  | 8.187659  |
| H | -3.219988 | -1.409979 | 7.334144  |
| N | -2.333241 | -7.484421 | -1.335851 |
| H | -2.950333 | -8.180341 | -0.914652 |

|   |           |           |           |
|---|-----------|-----------|-----------|
| H | -2.120353 | -7.581602 | -2.329828 |
| N | 2.991294  | 0.304381  | -7.315701 |
| H | 3.208949  | 1.299942  | -7.381939 |
| H | 2.957564  | -0.229818 | -8.185443 |
| N | 2.356644  | 7.346784  | 1.315534  |
| H | 1.974051  | 7.502645  | 2.249431  |
| H | 2.616228  | 8.169562  | 0.769172  |

### **NH<sub>2</sub> - Stage II**

E = -3761.406857

G = -3760.999619

|    |           |           |           |
|----|-----------|-----------|-----------|
| S  | -1.905571 | 0.662249  | -0.743547 |
| C  | -1.959722 | 2.249426  | -0.204930 |
| N  | -2.050191 | 3.378924  | 0.153550  |
| Co | 0.072513  | -0.080719 | 0.001539  |
| C  | -0.207374 | 1.218549  | 2.680417  |
| C  | -0.780522 | 1.000821  | 3.985080  |
| C  | -1.389144 | -0.278913 | 3.950438  |
| C  | -1.143194 | -0.813062 | 2.602596  |
| N  | -0.412114 | 0.095472  | 1.862800  |
| C  | 1.443150  | 2.348752  | -1.036286 |

|   |           |           |           |
|---|-----------|-----------|-----------|
| C | 1.769929  | 3.701830  | -0.666186 |
| C | 1.419892  | 3.843699  | 0.700658  |
| C | 0.867696  | 2.547199  | 1.117392  |
| N | 0.913697  | 1.653829  | 0.063550  |
| C | 0.581804  | -1.483318 | -2.590365 |
| C | 1.140644  | -1.261110 | -3.900580 |
| C | 1.618534  | 0.073436  | -3.915265 |
| C | 1.341411  | 0.621224  | -2.578843 |
| N | 0.744467  | -0.341958 | -1.789277 |
| C | -1.307578 | -2.520567 | 1.041422  |
| C | -1.703447 | -3.850381 | 0.650489  |
| C | -1.230873 | -4.040993 | -0.672639 |
| C | -0.557467 | -2.789629 | -1.050988 |
| N | -0.600288 | -1.896623 | 0.001442  |
| N | -1.572280 | -2.011097 | 2.238766  |
| N | 0.396868  | 2.349897  | 2.337888  |
| N | 1.647299  | 1.867377  | -2.257486 |
| N | -0.012025 | -2.620458 | -2.244871 |
| C | 2.219067  | 0.637468  | -5.033160 |
| C | -1.412792 | -5.231414 | -1.364472 |
| C | -2.387510 | -4.890119 | 1.317085  |
| C | -2.046638 | -0.820829 | 5.047171  |
| C | -0.833146 | 1.781387  | 5.160148  |

|   |           |           |           |
|---|-----------|-----------|-----------|
| C | 1.600841  | 5.031639  | 1.396414  |
| C | 2.326601  | 4.789194  | -1.374373 |
| C | 1.264240  | -2.072946 | -5.048839 |
| C | 1.861668  | -1.530675 | -6.184229 |
| H | 1.972239  | -2.137736 | -7.096041 |
| C | 2.346402  | -0.178564 | -6.205720 |
| C | -2.109184 | -6.291964 | -0.696349 |
| C | -2.586188 | -6.093110 | 0.643860  |
| H | -3.116912 | -6.922896 | 1.135551  |
| C | -2.103164 | -0.036453 | 6.246332  |
| C | -1.489092 | 1.261961  | 6.273793  |
| H | -1.547758 | 1.846371  | 7.205005  |
| C | 2.511767  | 5.993988  | -0.701386 |
| H | 2.936205  | 6.863597  | -1.226521 |
| C | 2.157308  | 6.143943  | 0.683156  |
| H | 0.898580  | -3.110491 | -5.051842 |
| H | 2.585204  | 1.674886  | -5.036391 |
| H | -1.039108 | -5.372668 | -2.389586 |
| H | -2.756008 | -4.758255 | 2.345281  |
| H | -2.515240 | -1.815608 | 5.012034  |
| H | -0.367944 | 2.777517  | 5.200268  |
| H | 1.323968  | 5.134103  | 2.456237  |
| H | 2.603065  | 4.693167  | -2.434838 |

|   |           |           |           |
|---|-----------|-----------|-----------|
| N | -2.733600 | -0.519882 | 7.343227  |
| H | -2.786205 | 0.031716  | 8.201871  |
| H | -3.171806 | -1.442847 | 7.329179  |
| N | -2.313193 | -7.472154 | -1.328125 |
| H | -2.805205 | -8.236987 | -0.862145 |
| H | -1.972170 | -7.620071 | -2.279824 |
| N | 2.918011  | 0.326362  | -7.324780 |
| H | 3.265309  | 1.287095  | -7.345741 |
| H | 3.010775  | -0.244262 | -8.167365 |
| N | 2.344516  | 7.328069  | 1.312017  |
| H | 2.090896  | 7.442704  | 2.295232  |
| H | 2.730090  | 8.130908  | 0.811102  |

**NH<sub>2</sub> - Stage III-a**

E = -3761.216507

G = -3760.807811

|    |           |           |           |
|----|-----------|-----------|-----------|
| S  | -2.078409 | 0.752670  | -0.793631 |
| C  | -2.007367 | 2.354800  | -0.335539 |
| N  | -1.963828 | 3.498874  | -0.007821 |
| Co | 0.029777  | -0.066863 | -0.009141 |
| C  | -0.191890 | 1.203234  | 2.684636  |

|   |           |           |           |
|---|-----------|-----------|-----------|
| C | -0.708753 | 0.960493  | 4.002053  |
| C | -1.311725 | -0.326108 | 3.971627  |
| C | -1.117403 | -0.838713 | 2.604343  |
| N | -0.419473 | 0.089601  | 1.855221  |
| C | 1.397283  | 2.375678  | -1.040056 |
| C | 1.689129  | 3.734315  | -0.686707 |
| C | 1.329978  | 3.878678  | 0.679103  |
| C | 0.804118  | 2.566209  | 1.105759  |
| N | 0.862050  | 1.680068  | 0.056792  |
| C | 0.608320  | -1.488862 | -2.568396 |
| C | 1.212221  | -1.284772 | -3.854543 |
| C | 1.693533  | 0.052405  | -3.870602 |
| C | 1.367205  | 0.621241  | -2.551303 |
| N | 0.741130  | -0.336489 | -1.773661 |
| C | -1.350017 | -2.516051 | 1.022692  |
| C | -1.772315 | -3.828912 | 0.625331  |
| C | -1.299450 | -4.017989 | -0.699160 |
| C | -0.594447 | -2.772462 | -1.065735 |
| N | -0.647706 | -1.885295 | -0.017651 |
| N | -1.575394 | -2.020157 | 2.238226  |
| N | 0.370297  | 2.355660  | 2.336487  |
| N | 1.643875  | 1.873849  | -2.249740 |
| N | -0.013136 | -2.619005 | -2.242374 |



|   |           |           |           |
|---|-----------|-----------|-----------|
| C | 2.318276  | 0.602544  | -4.972981 |
| C | -1.501465 | -5.192013 | -1.399460 |
| C | -2.478863 | -4.859423 | 1.287114  |
| C | -1.930770 | -0.881400 | 5.074715  |
| C | -0.728398 | 1.738245  | 5.183309  |
| C | 1.489831  | 5.065508  | 1.367040  |
| C | 2.232438  | 4.825103  | -1.404375 |
| C | 1.358060  | -2.117682 | -4.988463 |
| C | 1.986428  | -1.594436 | -6.110623 |
| H | 2.123393  | -2.209800 | -7.012694 |
| C | 2.474091  | -0.239013 | -6.132234 |
| C | -2.228316 | -6.245697 | -0.734418 |
| C | -2.703707 | -6.051076 | 0.606587  |
| H | -3.252638 | -6.873983 | 1.088638  |
| C | -1.947337 | -0.101091 | 6.285544  |
| C | -1.341291 | 1.205802  | 6.309969  |
| H | -1.375464 | 1.777037  | 7.249984  |
| C | 2.394929  | 6.036848  | -0.742863 |
| H | 2.807006  | 6.910478  | -1.270134 |
| C | 2.033245  | 6.186380  | 0.639555  |
| H | 0.985811  | -3.152188 | -4.982968 |
| H | 2.684034  | 1.639644  | -4.986410 |
| H | -1.129404 | -5.337923 | -2.424417 |

|   |           |           |           |
|---|-----------|-----------|-----------|
| H | -2.843877 | -4.724721 | 2.315808  |
| H | -2.399249 | -1.876175 | 5.049283  |
| H | -0.270207 | 2.737348  | 5.211035  |
| H | 1.213309  | 5.174235  | 2.426250  |
| H | 2.515348  | 4.721573  | -2.462093 |
| N | -2.531552 | -0.597426 | 7.390045  |
| H | -2.554211 | -0.056976 | 8.259900  |
| H | -2.964979 | -1.525294 | 7.381516  |
| N | -2.451841 | -7.405519 | -1.381490 |
| H | -2.964683 | -8.167623 | -0.929988 |
| H | -2.112569 | -7.545503 | -2.336711 |
| N | 3.073183  | 0.246873  | -7.233171 |
| H | 3.422636  | 1.209217  | -7.258422 |
| H | 3.192245  | -0.336866 | -8.066279 |
| N | 2.194885  | 7.366706  | 1.266624  |
| H | 1.939642  | 7.475391  | 2.251817  |
| H | 2.574430  | 8.176798  | 0.769251  |

**NH<sub>2</sub> - Stage III-b**

E = -3761.225200

G = -3760.815035

|    |           |           |           |
|----|-----------|-----------|-----------|
| S  | -1.830666 | 0.701480  | -0.782660 |
| C  | -2.186882 | 1.953203  | 0.277404  |
| N  | -2.492204 | 2.848792  | 0.994400  |
| Co | 0.094985  | -0.078153 | -0.013065 |
| C  | -0.216644 | 1.227115  | 2.654637  |
| C  | -0.857265 | 1.048600  | 3.925924  |
| C  | -1.483303 | -0.223149 | 3.885333  |
| C  | -1.178015 | -0.791852 | 2.558200  |
| N  | -0.400911 | 0.101071  | 1.840160  |
| C  | 1.468931  | 2.353307  | -1.043837 |
| C  | 1.866358  | 3.676332  | -0.656031 |
| C  | 1.545956  | 3.805606  | 0.719522  |
| C  | 0.927960  | 2.527049  | 1.121712  |
| N  | 0.922788  | 1.657352  | 0.045498  |
| C  | 0.573744  | -1.462812 | -2.618571 |
| C  | 1.071751  | -1.223945 | -3.943191 |
| C  | 1.534855  | 0.116429  | -3.963408 |
| C  | 1.305385  | 0.652972  | -2.607714 |
| N  | 0.736874  | -0.326377 | -1.812888 |
| C  | -1.281121 | -2.520244 | 1.020466  |
| C  | -1.624194 | -3.866071 | 0.658328  |
| C  | -1.113992 | -4.072141 | -0.649010 |
| C  | -0.485596 | -2.798272 | -1.052434 |

|   |           |           |           |
|---|-----------|-----------|-----------|
| N | -0.573733 | -1.891606 | -0.012683 |
| N | -1.593964 | -1.989260 | 2.203813  |
| N | 0.443499  | 2.340337  | 2.330931  |
| N | 1.633383  | 1.885621  | -2.282166 |
| N | 0.034349  | -2.625999 | -2.250028 |
| C | 2.080694  | 0.697515  | -5.093007 |
| C | -1.238674 | -5.277356 | -1.314380 |
| C | -2.290087 | -4.910743 | 1.339198  |
| C | -2.202194 | -0.732409 | 4.950797  |
| C | -0.954235 | 1.857885  | 5.080599  |
| C | 1.784626  | 4.965307  | 1.432917  |
| C | 2.461106  | 4.750933  | -1.356241 |
| C | 1.157171  | -2.028240 | -5.102444 |
| C | 1.698892  | -1.471120 | -6.255819 |
| H | 1.778657  | -2.067020 | -7.177610 |
| C | 2.165448  | -0.112882 | -6.282457 |
| C | -1.915542 | -6.348823 | -0.627122 |
| C | -2.431334 | -6.135832 | 0.696026  |
| H | -2.943999 | -6.971824 | 1.195227  |
| C | -2.308197 | 0.086562  | 6.132487  |
| C | -1.675187 | 1.375544  | 6.167689  |
| H | -1.774277 | 1.979300  | 7.082479  |
| C | 2.713248  | 5.931587  | -0.666117 |

|   |           |           |           |
|---|-----------|-----------|-----------|
| H | 3.169139  | 6.791308  | -1.180102 |
| C | 2.384802  | 6.068660  | 0.725484  |
| H | 0.803397  | -3.069473 | -5.096274 |
| H | 2.438024  | 1.737767  | -5.104166 |
| H | -0.839865 | -5.433753 | -2.327657 |
| H | -2.687609 | -4.762099 | 2.353823  |
| H | -2.683194 | -1.721064 | 4.915774  |
| H | -0.473561 | 2.846152  | 5.121057  |
| H | 1.527862  | 5.063451  | 2.498078  |
| H | 2.713349  | 4.660983  | -2.422932 |
| N | -3.002786 | -0.366998 | 7.194140  |
| H | -3.092425 | 0.198936  | 8.042107  |
| H | -3.451787 | -1.286254 | 7.172087  |
| N | -2.055548 | -7.542071 | -1.236663 |
| H | -2.527706 | -8.319064 | -0.766835 |
| H | -1.685811 | -7.694658 | -2.178380 |
| N | 2.682101  | 0.414446  | -7.409645 |
| H | 3.015064  | 1.381800  | -7.429976 |
| H | 2.749418  | -0.142659 | -8.265547 |
| N | 2.629026  | 7.220769  | 1.379358  |
| H | 2.391507  | 7.320656  | 2.369685  |
| H | 3.048159  | 8.019397  | 0.895724  |

## NH<sub>2</sub> - Stage IV

E = -4252.282899

G = -4251.874422

|    |           |           |           |
|----|-----------|-----------|-----------|
| S  | -1.744796 | -0.193078 | -0.121605 |
| C  | -2.218106 | 0.945408  | 1.030239  |
| N  | -2.556881 | 1.745049  | 1.837087  |
| Co | 0.565556  | 0.136364  | -0.038490 |
| C  | 0.676869  | 0.443934  | 2.912725  |
| C  | 0.721907  | -0.337801 | 4.123066  |
| C  | 0.731715  | -1.702292 | 3.731440  |
| C  | 0.716183  | -1.705867 | 2.266139  |
| N  | 0.692451  | -0.396421 | 1.789090  |
| C  | 0.243818  | 3.087451  | -0.325427 |
| C  | 0.087967  | 4.290124  | 0.452002  |
| C  | 0.246949  | 3.913808  | 1.810685  |
| C  | 0.470051  | 2.461661  | 1.806514  |
| N  | 0.479181  | 1.988640  | 0.507660  |
| C  | 0.737481  | -0.142113 | -2.997213 |
| C  | 0.648219  | 0.635303  | -4.208552 |
| C  | 0.420695  | 1.980333  | -3.815726 |
| C  | 0.398651  | 1.978171  | -2.349964 |

|   |           |           |           |
|---|-----------|-----------|-----------|
| N | 0.613406  | 0.688553  | -1.873932 |
| C | 0.795741  | -2.826575 | 0.242302  |
| C | 0.888916  | -4.036664 | -0.533879 |
| C | 0.958019  | -3.637254 | -1.893636 |
| C | 0.884326  | -2.168985 | -1.890732 |
| N | 0.802643  | -1.703805 | -0.591777 |
| N | 0.741193  | -2.825957 | 1.571484  |
| N | 0.602139  | 1.769043  | 2.923567  |
| N | 0.198741  | 3.080654  | -1.654680 |
| N | 0.876900  | -1.462726 | -3.008083 |
| C | 0.264695  | 3.006817  | -4.736692 |
| C | 1.063205  | -4.552868 | -2.931671 |
| C | 0.930089  | -5.405176 | -0.187388 |
| C | 0.756081  | -2.739433 | 4.653776  |
| C | 0.733364  | 0.017811  | 5.490192  |
| C | 0.169609  | 4.831070  | 2.849231  |
| C | -0.154439 | 5.637796  | 0.106828  |
| C | 0.722359  | 0.288801  | -5.576187 |
| C | 0.571340  | 1.298845  | -6.519342 |
| H | 0.624659  | 1.068292  | -7.594486 |
| C | 0.341232  | 2.666093  | -6.126971 |
| C | 1.099152  | -5.946189 | -2.589342 |
| C | 1.032188  | -6.343918 | -1.209659 |

|   |           |           |           |
|---|-----------|-----------|-----------|
| H | 1.062411  | -7.419196 | -0.975518 |
| C | 0.767775  | -2.389331 | 6.043477  |
| C | 0.757039  | -1.002252 | 6.434119  |
| H | 0.766491  | -0.764715 | 7.508990  |
| C | -0.241369 | 6.577114  | 1.129972  |
| H | -0.435861 | 7.635385  | 0.897330  |
| C | -0.083942 | 6.201940  | 2.508897  |
| H | 0.894978  | -0.751137 | -5.889375 |
| H | 0.086004  | 4.047417  | -4.428480 |
| H | 1.115963  | -4.239222 | -3.984786 |
| H | 0.879172  | -5.725487 | 0.863639  |
| H | 0.762432  | -3.795382 | 4.346238  |
| H | 0.723112  | 1.072230  | 5.802020  |
| H | 0.292058  | 4.534153  | 3.901361  |
| H | -0.277572 | 5.940618  | -0.943413 |
| N | 0.788151  | -3.354545 | 6.988194  |
| H | 0.796155  | -3.113039 | 7.982310  |
| H | 0.794439  | -4.343325 | 6.725608  |
| N | 1.195377  | -6.878719 | -3.564305 |
| H | 1.219851  | -7.874684 | -3.334019 |
| H | 1.241234  | -6.603867 | -4.548075 |
| N | 0.197811  | 3.622284  | -7.069970 |
| H | 0.035578  | 4.597423  | -6.806380 |



|   |           |           |           |
|---|-----------|-----------|-----------|
| H | 0.249112  | 3.387754  | -8.064465 |
| N | -0.174516 | 7.134455  | 3.484374  |
| H | -0.068605 | 6.874227  | 4.467480  |
| H | -0.358055 | 8.114185  | 3.256244  |
| S | -4.406988 | -0.627667 | -0.528626 |
| C | -4.728602 | 0.937907  | -0.989361 |
| N | -4.969052 | 2.059878  | -1.315889 |

### **NH<sub>2</sub> - Stage V**

E = -4252.291563

G = -4251.880616

|    |           |           |           |
|----|-----------|-----------|-----------|
| S  | -1.708482 | -0.116993 | -0.215765 |
| C  | -2.162603 | 0.618954  | 1.229801  |
| N  | -2.480355 | 1.148059  | 2.243025  |
| Co | 0.575495  | 0.134910  | -0.069631 |
| C  | 0.645975  | 0.432483  | 2.895718  |
| C  | 0.653586  | -0.341148 | 4.107042  |
| C  | 0.656100  | -1.702649 | 3.713242  |
| C  | 0.676034  | -1.702842 | 2.235730  |
| N  | 0.674219  | -0.404015 | 1.768780  |
| C  | 0.238001  | 3.079879  | -0.355865 |

|   |          |           |           |
|---|----------|-----------|-----------|
| C | 0.091764 | 4.283443  | 0.417698  |
| C | 0.249603 | 3.907820  | 1.775203  |
| C | 0.462616 | 2.446009  | 1.775165  |
| N | 0.464964 | 1.975262  | 0.477463  |
| C | 0.764007 | -0.134260 | -3.038771 |
| C | 0.669081 | 0.633721  | -4.251908 |
| C | 0.427482 | 1.973603  | -3.858299 |
| C | 0.402320 | 1.969897  | -2.381224 |
| N | 0.629181 | 0.691131  | -1.913515 |
| C | 0.812604 | -2.820871 | 0.213449  |
| C | 0.934594 | -4.027928 | -0.558976 |
| C | 1.028150 | -3.626958 | -1.915266 |
| C | 0.935177 | -2.152314 | -1.914965 |
| N | 0.829507 | -1.691754 | -0.618066 |
| N | 0.718873 | -2.824733 | 1.542784  |
| N | 0.592481 | 1.763832  | 2.895953  |
| N | 0.194435 | 3.072770  | -1.688073 |
| N | 0.926914 | -1.457279 | -3.036878 |
| C | 0.267879 | 2.999659  | -4.772659 |
| C | 1.161076 | -4.534554 | -2.950803 |
| C | 0.980379 | -5.396744 | -0.214068 |
| C | 0.648894 | -2.740330 | 4.627612  |
| C | 0.639882 | 0.007174  | 5.475572  |

|   |           |           |           |
|---|-----------|-----------|-----------|
| C | 0.179052  | 4.820387  | 2.811961  |
| C | -0.142950 | 5.632634  | 0.072931  |
| C | 0.754060  | 0.295936  | -5.620398 |
| C | 0.598301  | 1.307091  | -6.564958 |
| H | 0.659399  | 1.078199  | -7.639868 |
| C | 0.354216  | 2.665315  | -6.171585 |
| C | 1.203787  | -5.933873 | -2.609482 |
| C | 1.112630  | -6.334580 | -1.234472 |
| H | 1.147789  | -7.409676 | -1.001042 |
| C | 0.635091  | -2.395256 | 6.027083  |
| C | 0.631735  | -1.015090 | 6.420319  |
| H | 0.620467  | -0.778949 | 7.495298  |
| C | -0.222828 | 6.574795  | 1.094918  |
| H | -0.410478 | 7.633942  | 0.861613  |
| C | -0.066438 | 6.199068  | 2.471034  |
| H | 0.939273  | -0.741020 | -5.937156 |
| H | 0.078650  | 4.037980  | -4.462002 |
| H | 1.231173  | -4.218760 | -4.002349 |
| H | 0.909616  | -5.718640 | 0.835321  |
| H | 0.649800  | -3.795769 | 4.317279  |
| H | 0.635336  | 1.060737  | 5.791204  |
| H | 0.300369  | 4.523025  | 3.864184  |
| H | -0.265914 | 5.935192  | -0.977399 |

|   |           |           |           |
|---|-----------|-----------|-----------|
| N | 0.624559  | -3.375567 | 6.954187  |
| H | 0.610817  | -3.151067 | 7.952178  |
| H | 0.624320  | -4.359713 | 6.675314  |
| N | 1.329017  | -6.854119 | -3.588690 |
| H | 1.359255  | -7.852354 | -3.367219 |
| H | 1.390068  | -6.569994 | -4.569350 |
| N | 0.202559  | 3.634581  | -7.098592 |
| H | 0.032839  | 4.603913  | -6.819892 |
| H | 0.257385  | 3.416665  | -8.096506 |
| N | -0.147350 | 7.122313  | 3.452013  |
| H | -0.041004 | 6.853519  | 4.433163  |
| H | -0.323884 | 8.105714  | 3.232308  |
| S | -4.493284 | -0.391826 | -0.644577 |
| C | -4.806364 | 1.227686  | -0.455941 |
| N | -5.036854 | 2.391629  | -0.314162 |

### MeO - Stage I

E = -3998.025146

G = -3997.561816

|   |           |          |           |
|---|-----------|----------|-----------|
| S | -1.806643 | 0.662617 | -0.712896 |
| C | -1.890639 | 2.206996 | -0.062090 |

|    |           |           |           |
|----|-----------|-----------|-----------|
| N  | -2.009032 | 3.307015  | 0.370341  |
| Co | 0.140807  | -0.109440 | 0.023765  |
| C  | -0.071816 | 1.227022  | 2.684044  |
| C  | -0.644795 | 1.035925  | 4.006114  |
| C  | -1.298881 | -0.220992 | 3.984304  |
| C  | -1.080580 | -0.773083 | 2.648203  |
| N  | -0.325011 | 0.105906  | 1.888898  |
| C  | 1.542598  | 2.274689  | -1.064674 |
| C  | 1.907628  | 3.634496  | -0.707859 |
| C  | 1.581317  | 3.793896  | 0.662178  |
| C  | 1.011560  | 2.520740  | 1.097694  |
| N  | 1.014013  | 1.614529  | 0.049462  |
| C  | 0.603119  | -1.561206 | -2.544427 |
| C  | 1.163062  | -1.365096 | -3.871339 |
| C  | 1.652570  | -0.035644 | -3.910097 |
| C  | 1.392267  | 0.534299  | -2.589053 |
| N  | 0.786061  | -0.408346 | -1.775571 |
| C  | -1.288701 | -2.493604 | 1.106420  |
| C  | -1.719044 | -3.830198 | 0.731516  |
| C  | -1.253868 | -4.048504 | -0.589556 |
| C  | -0.556347 | -2.826113 | -0.985126 |
| N  | -0.572908 | -1.912989 | 0.056107  |
| N  | -1.538269 | -1.965802 | 2.293498  |

|   |           |           |           |
|---|-----------|-----------|-----------|
| N | 0.556239  | 2.335098  | 2.328922  |
| N | 1.722577  | 1.780153  | -2.278271 |
| N | -0.005851 | -2.678726 | -2.182618 |
| C | 2.256948  | 0.494841  | -5.052401 |
| C | -1.473250 | -5.254831 | -1.259156 |
| C | -2.424906 | -4.834730 | 1.414150  |
| C | -1.970534 | -0.722086 | 5.102139  |
| C | -0.659586 | 1.828431  | 5.165520  |
| C | 1.794050  | 4.998741  | 1.336019  |
| C | 2.463915  | 4.698407  | -1.437468 |
| C | 1.267435  | -2.197168 | -4.998114 |
| C | 1.868443  | -1.681857 | -6.155661 |
| H | 1.955709  | -2.321682 | -7.044028 |
| C | 2.362484  | -0.345785 | -6.186394 |
| C | -2.185166 | -6.265142 | -0.569473 |
| C | -2.657933 | -6.051694 | 0.757573  |
| H | -3.208881 | -6.845214 | 1.279870  |
| C | -1.983776 | 0.077735  | 6.269711  |
| C | -1.332071 | 1.344428  | 6.297065  |
| H | -1.351669 | 1.954747  | 7.209906  |
| C | 2.677380  | 5.918604  | -0.780871 |
| H | 3.103690  | 6.761167  | -1.341551 |
| C | 2.344699  | 6.072412  | 0.596437  |

|   |           |           |           |
|---|-----------|-----------|-----------|
| H | 0.889548  | -3.230184 | -4.981043 |
| H | 2.641867  | 1.523825  | -5.093931 |
| H | -1.113033 | -5.437251 | -2.281761 |
| H | -2.787983 | -4.678961 | 2.440907  |
| H | -2.479951 | -1.696341 | 5.098080  |
| H | -0.157610 | 2.806934  | 5.193479  |
| H | 1.539834  | 5.135462  | 2.396812  |
| H | 2.721102  | 4.587176  | -2.501292 |
| O | 2.520866  | 7.233624  | 1.286185  |
| O | 2.957178  | 0.210377  | -7.278621 |
| O | -2.374999 | -7.425956 | -1.256871 |
| O | -2.652087 | -0.446402 | 7.335091  |
| C | -2.711105 | 0.309353  | 8.549365  |
| H | -3.224990 | 1.282371  | 8.395814  |
| H | -3.293979 | -0.303604 | 9.261290  |
| H | -1.696296 | 0.488624  | 8.964462  |
| C | -3.076767 | -8.497699 | -0.617674 |
| H | -2.548936 | -8.836569 | 0.299431  |
| H | -4.116415 | -8.203791 | -0.358814 |
| H | -3.102459 | -9.324576 | -1.351108 |
| C | 3.102555  | -0.582012 | -8.462164 |
| H | 2.115138  | -0.895026 | -8.863847 |
| H | 3.608750  | 0.065719  | -9.201400 |

|   |          |           |           |
|---|----------|-----------|-----------|
| H | 3.726866 | -1.481379 | -8.272987 |
| C | 3.043085 | 8.373645  | 0.595122  |
| H | 2.382077 | 8.674756  | -0.245576 |
| H | 3.081339 | 9.189504  | 1.340255  |
| H | 4.067014 | 8.180145  | 0.209927  |

### MeO - Stage II

E = -3997.842932

G = -3997.380408

|    |           |           |           |
|----|-----------|-----------|-----------|
| S  | -1.769213 | 0.694905  | -0.723979 |
| C  | -1.939885 | 2.130466  | 0.128807  |
| N  | -2.116736 | 3.155424  | 0.701174  |
| Co | 0.156145  | -0.113619 | 0.021055  |
| C  | -0.058771 | 1.213964  | 2.681748  |
| C  | -0.644265 | 1.031596  | 3.996054  |
| C  | -1.308734 | -0.217736 | 3.969232  |
| C  | -1.083742 | -0.774890 | 2.631057  |
| N  | -0.315632 | 0.101004  | 1.878871  |
| C  | 1.554091  | 2.272697  | -1.059995 |
| C  | 1.927261  | 3.626728  | -0.700646 |
| C  | 1.619629  | 3.776740  | 0.672934  |



|   |           |           |           |
|---|-----------|-----------|-----------|
| C | 1.043643  | 2.500134  | 1.107031  |
| N | 1.031990  | 1.602966  | 0.050224  |
| C | 0.602964  | -1.551332 | -2.554007 |
| C | 1.152088  | -1.352750 | -3.881675 |
| C | 1.647629  | -0.027286 | -3.917104 |
| C | 1.393143  | 0.541821  | -2.589278 |
| N | 0.786154  | -0.404207 | -1.778632 |
| C | -1.284777 | -2.493125 | 1.091224  |
| C | -1.700929 | -3.833407 | 0.724613  |
| C | -1.220790 | -4.057620 | -0.588137 |
| C | -0.534485 | -2.825137 | -0.990847 |
| N | -0.567050 | -1.907763 | 0.047012  |
| N | -1.546388 | -1.961747 | 2.278031  |
| N | 0.591517  | 2.316340  | 2.335507  |
| N | 1.725868  | 1.783456  | -2.280435 |
| N | 0.007429  | -2.678699 | -2.188124 |
| C | 2.246961  | 0.507081  | -5.053165 |
| C | -1.416079 | -5.265503 | -1.249996 |
| C | -2.399851 | -4.838328 | 1.412381  |
| C | -1.994509 | -0.713015 | 5.073594  |
| C | -0.659350 | 1.826572  | 5.152962  |
| C | 1.838338  | 4.970032  | 1.353191  |
| C | 2.475700  | 4.692599  | -1.432058 |

|   |           |           |           |
|---|-----------|-----------|-----------|
| C | 1.246464  | -2.183141 | -5.009799 |
| C | 1.844844  | -1.667112 | -6.169213 |
| H | 1.924432  | -2.303877 | -7.060227 |
| C | 2.344501  | -0.335440 | -6.196683 |
| C | -2.124131 | -6.284544 | -0.552167 |
| C | -2.611135 | -6.065745 | 0.766265  |
| H | -3.155652 | -6.861144 | 1.291882  |
| C | -2.010169 | 0.093035  | 6.246935  |
| C | -1.346623 | 1.350849  | 6.280069  |
| H | -1.367878 | 1.962298  | 7.191853  |
| C | 2.698516  | 5.909747  | -0.771076 |
| H | 3.117577  | 6.755330  | -1.332254 |
| C | 2.383031  | 6.054414  | 0.608789  |
| H | 0.863178  | -3.213825 | -4.993236 |
| H | 2.636502  | 1.534101  | -5.093922 |
| H | -1.044567 | -5.454045 | -2.267198 |
| H | -2.773844 | -4.676143 | 2.433882  |
| H | -2.514279 | -1.681488 | 5.066647  |
| H | -0.147534 | 2.799519  | 5.183021  |
| H | 1.598242  | 5.101151  | 2.417764  |
| H | 2.718488  | 4.586841  | -2.499508 |
| O | -2.690979 | -0.427165 | 7.293923  |
| O | -2.284693 | -7.443375 | -1.231593 |

|   |           |           |           |
|---|-----------|-----------|-----------|
| O | 2.935489  | 0.224956  | -7.276943 |
| O | 2.561827  | 7.199470  | 1.306122  |
| C | 3.077336  | 8.355012  | 0.629355  |
| H | 2.406257  | 8.663163  | -0.199744 |
| H | 3.118818  | 9.156038  | 1.389356  |
| H | 4.097153  | 8.163993  | 0.234292  |
| C | 3.082068  | -0.553690 | -8.473279 |
| H | 2.092535  | -0.855834 | -8.875991 |
| H | 3.592238  | 0.103551  | -9.200352 |
| H | 3.701938  | -1.456022 | -8.287921 |
| C | -2.974267 | -8.531149 | -0.599202 |
| H | -4.020936 | -8.252144 | -0.355727 |
| H | -2.972207 | -9.357239 | -1.333051 |
| H | -2.448252 | -8.852597 | 0.324325  |
| C | -2.761993 | 0.318930  | 8.517231  |
| H | -3.266959 | 1.295051  | 8.359421  |
| H | -3.358056 | -0.298381 | 9.213313  |
| H | -1.749691 | 0.485850  | 8.941488  |

**MeO - Stage III-a**

E = -3997.631789

G = -3997.169644

|    |           |           |           |
|----|-----------|-----------|-----------|
| S  | -1.986430 | 0.776077  | -0.781685 |
| C  | -1.937195 | 2.336336  | -0.194642 |
| N  | -1.900870 | 3.448279  | 0.227101  |
| Co | 0.070939  | -0.081943 | 0.003850  |
| C  | -0.063290 | 1.214272  | 2.694512  |
| C  | -0.563285 | 0.990737  | 4.028215  |
| C  | -1.221584 | -0.265298 | 4.007035  |
| C  | -1.069789 | -0.788527 | 2.639945  |
| N  | -0.354583 | 0.110057  | 1.876247  |
| C  | 1.485947  | 2.303508  | -1.067725 |
| C  | 1.806397  | 3.670039  | -0.731116 |
| C  | 1.472531  | 3.833932  | 0.635160  |
| C  | 0.935429  | 2.538963  | 1.086612  |
| N  | 0.952826  | 1.638511  | 0.043622  |
| C  | 0.638228  | -1.569683 | -2.524597 |
| C  | 1.250756  | -1.398199 | -3.818190 |
| C  | 1.744110  | -0.069264 | -3.858046 |
| C  | 1.421274  | 0.529843  | -2.553081 |
| N  | 0.782985  | -0.402205 | -1.759169 |
| C  | -1.350340 | -2.475340 | 1.078262  |
| C  | -1.798402 | -3.796284 | 0.700274  |
| C  | -1.319611 | -4.020282 | -0.612841 |

|   |           |           |           |
|---|-----------|-----------|-----------|
| C | -0.591784 | -2.799998 | -1.001009 |
| N | -0.637129 | -1.884792 | 0.027802  |
| N | -1.565563 | -1.960944 | 2.283378  |
| N | 0.528706  | 2.343161  | 2.330034  |
| N | 1.713019  | 1.786288  | -2.270352 |
| N | 0.001777  | -2.681429 | -2.176680 |
| C | 2.378848  | 0.447221  | -4.973644 |
| C | -1.540671 | -5.210434 | -1.285973 |
| C | -2.525666 | -4.788802 | 1.379450  |
| C | -1.846388 | -0.787727 | 5.125922  |
| C | -0.525458 | 1.767745  | 5.201270  |
| C | 1.656630  | 5.033981  | 1.300085  |
| C | 2.342137  | 4.736472  | -1.474482 |
| C | 1.387589  | -2.254079 | -4.927440 |
| C | 2.029514  | -1.761957 | -6.069161 |
| H | 2.149116  | -2.413909 | -6.944338 |
| C | 2.523726  | -0.425653 | -6.101247 |
| C | -2.288792 | -6.219911 | -0.596687 |
| C | -2.772949 | -6.002400 | 0.721553  |
| H | -3.342375 | -6.786749 | 1.236907  |
| C | -1.801498 | -0.000658 | 6.322455  |
| C | -1.145229 | 1.264187  | 6.350254  |
| H | -1.124975 | 1.853553  | 7.276309  |

|   |           |           |           |
|---|-----------|-----------|-----------|
| C | 2.526624  | 5.969271  | -0.833269 |
| H | 2.934450  | 6.815219  | -1.401610 |
| C | 2.190027  | 6.125383  | 0.539073  |
| H | 1.002755  | -3.283630 | -4.902338 |
| H | 2.762300  | 1.475813  | -5.025816 |
| H | -1.170591 | -5.402936 | -2.302923 |
| H | -2.894976 | -4.624799 | 2.402136  |
| H | -2.364797 | -1.756725 | 5.128024  |
| H | -0.022170 | 2.745034  | 5.220129  |
| H | 1.404712  | 5.178313  | 2.360145  |
| H | 2.605958  | 4.615108  | -2.535056 |
| O | -2.416618 | -0.548140 | 7.378770  |
| O | -2.479193 | -7.352342 | -1.293204 |
| O | 3.146112  | 0.116949  | -7.155289 |
| O | 2.331897  | 7.271153  | 1.223992  |
| C | 2.842254  | 8.437562  | 0.554637  |
| H | 2.181909  | 8.724493  | -0.289556 |
| H | 2.850705  | 9.238637  | 1.314726  |
| H | 3.872633  | 8.256642  | 0.184975  |
| C | 3.346171  | -0.664194 | -8.347971 |
| H | 2.371633  | -0.969615 | -8.780759 |
| H | 3.879588  | -0.001266 | -9.051495 |
| H | 3.962814  | -1.559695 | -8.128435 |

|   |           |           |           |
|---|-----------|-----------|-----------|
| C | -3.218076 | -8.433104 | -0.697681 |
| H | -4.253882 | -8.114461 | -0.459726 |
| H | -3.236214 | -9.236276 | -1.455405 |
| H | -2.711905 | -8.792840 | 0.221929  |
| C | -2.435412 | 0.150683  | 8.637395  |
| H | -2.959127 | 1.123068  | 8.534336  |
| H | -2.988578 | -0.504253 | 9.333114  |
| H | -1.402678 | 0.311817  | 9.008470  |

### **MeO - Stage III-b**

E = -3997.645337

G = -3997.181886

|    |           |           |           |
|----|-----------|-----------|-----------|
| S  | -1.761246 | 0.726553  | -0.729399 |
| C  | -1.992703 | 2.066725  | 0.253633  |
| N  | -2.206636 | 3.024695  | 0.920892  |
| Co | 0.154288  | -0.112415 | 0.014552  |
| C  | -0.068841 | 1.211991  | 2.674504  |
| C  | -0.679239 | 1.048229  | 3.972864  |
| C  | -1.351127 | -0.196360 | 3.943545  |
| C  | -1.102659 | -0.769842 | 2.610436  |
| N  | -0.318384 | 0.098657  | 1.868350  |

|   |           |           |           |
|---|-----------|-----------|-----------|
| C | 1.564891  | 2.271231  | -1.056967 |
| C | 1.969670  | 3.608066  | -0.690974 |
| C | 1.674866  | 3.751719  | 0.685352  |
| C | 1.066560  | 2.481330  | 1.113151  |
| N | 1.033630  | 1.596950  | 0.047514  |
| C | 0.574683  | -1.533625 | -2.572464 |
| C | 1.095266  | -1.328811 | -3.903876 |
| C | 1.598388  | -0.006811 | -3.937497 |
| C | 1.368623  | 0.556887  | -2.596720 |
| N | 0.766569  | -0.392490 | -1.788118 |
| C | -1.281872 | -2.496050 | 1.081556  |
| C | -1.668542 | -3.843034 | 0.731386  |
| C | -1.183097 | -4.069615 | -0.578270 |
| C | -0.525298 | -2.820187 | -0.997232 |
| N | -0.576415 | -1.899026 | 0.034741  |
| N | -1.560075 | -1.956472 | 2.265374  |
| N | 0.607960  | 2.306032  | 2.335954  |
| N | 1.717550  | 1.789536  | -2.287269 |
| N | -0.001376 | -2.672743 | -2.197866 |
| C | 2.180773  | 0.532119  | -5.072750 |
| C | -1.347609 | -5.282359 | -1.226375 |
| C | -2.344729 | -4.855532 | 1.433578  |
| C | -2.059701 | -0.677359 | 5.031859  |



|   |           |           |           |
|---|-----------|-----------|-----------|
| C | -0.708692 | 1.856287  | 5.122238  |
| C | 1.919850  | 4.927872  | 1.373773  |
| C | 2.535981  | 4.668073  | -1.420295 |
| C | 1.164476  | -2.155134 | -5.038666 |
| C | 1.745408  | -1.637123 | -6.205008 |
| H | 1.804927  | -2.267301 | -7.102016 |
| C | 2.253626  | -0.310126 | -6.230168 |
| C | -2.033185 | -6.316828 | -0.509306 |
| C | -2.525518 | -6.096193 | 0.805163  |
| H | -3.049452 | -6.898382 | 1.340808  |
| C | -2.093729 | 0.147377  | 6.203495  |
| C | -1.421493 | 1.398965  | 6.240123  |
| H | -1.456396 | 2.019172  | 7.145339  |
| C | 2.789839  | 5.875032  | -0.753248 |
| H | 3.222763  | 6.716276  | -1.310039 |
| C | 2.486163  | 6.013188  | 0.628434  |
| H | 0.774200  | -3.182906 | -5.019549 |
| H | 2.578352  | 1.555899  | -5.115706 |
| H | -0.973998 | -5.476476 | -2.241710 |
| H | -2.722984 | -4.687093 | 2.452263  |
| H | -2.586791 | -1.641787 | 5.026885  |
| H | -0.188334 | 2.824464  | 5.150859  |
| H | 1.690430  | 5.058245  | 2.440774  |

|   |           |           |           |
|---|-----------|-----------|-----------|
| H | 2.767632  | 4.563695  | -2.490148 |
| O | -2.799588 | -0.360785 | 7.226409  |
| O | -2.156305 | -7.475434 | -1.176867 |
| O | 2.829812  | 0.256601  | -7.302487 |
| O | 2.686884  | 7.135543  | 1.337174  |
| C | 3.223652  | 8.299158  | 0.684305  |
| H | 2.553441  | 8.631752  | -0.135059 |
| H | 3.280661  | 9.079553  | 1.463558  |
| H | 4.237016  | 8.091031  | 0.283302  |
| C | 2.963762  | -0.501996 | -8.517187 |
| H | 1.967003  | -0.788399 | -8.911562 |
| H | 3.472553  | 0.167304  | -9.233098 |
| H | 3.578160  | -1.409976 | -8.345807 |
| C | -2.811975 | -8.588641 | -0.545169 |
| H | -3.866802 | -8.338943 | -0.308096 |
| H | -2.776474 | -9.412805 | -1.279336 |
| H | -2.275920 | -8.883851 | 0.380469  |
| C | -2.912211 | 0.388125  | 8.448816  |
| H | -3.411253 | 1.361992  | 8.265392  |
| H | -3.530410 | -0.230525 | 9.122975  |
| H | -1.912297 | 0.554670  | 8.899979  |

**MeO - Stage IV**

E = -4488.718421

G = -4488.252670

S -1.636211 -0.251755 -0.076229

C -2.240724 0.883455 1.002822

N -2.696227 1.673288 1.760524

Co 0.555498 0.076007 -0.012888

C 0.644419 0.439443 2.949147

C 0.763007 -0.316205 4.179272

C 0.874614 -1.677128 3.806731

C 0.837899 -1.707199 2.339718

N 0.724844 -0.422537 1.845110

C 0.314574 3.031886 -0.360826

C 0.095539 4.243535 0.399393

C 0.113117 3.870609 1.764803

C 0.357688 2.423622 1.792144

N 0.473194 1.940054 0.504443

C 0.695878 -0.258070 -2.973388

C 0.614847 0.498887 -4.203164

C 0.492162 1.859447 -3.830752

C 0.493325 1.884899 -2.362244

N 0.652964 0.604536 -1.868305

|   |           |           |           |
|---|-----------|-----------|-----------|
| C | 0.907317  | -2.866656 | 0.335399  |
| C | 0.997649  | -4.094996 | -0.426449 |
| C | 0.958107  | -3.725524 | -1.792556 |
| C | 0.848281  | -2.261298 | -1.819900 |
| N | 0.831913  | -1.766923 | -0.530266 |
| N | 0.911576  | -2.841124 | 1.659302  |
| N | 0.466215  | 1.750166  | 2.927951  |
| N | 0.353560  | 3.012076  | -1.683820 |
| N | 0.784097  | -1.580555 | -2.953406 |
| C | 0.385704  | 2.875717  | -4.770425 |
| C | 1.027578  | -4.665485 | -2.813440 |
| C | 1.108006  | -5.443932 | -0.051022 |
| C | 0.996460  | -2.692760 | 4.747842  |
| C | 0.770639  | 0.059936  | 5.532428  |
| C | -0.077901 | 4.794287  | 2.784761  |
| C | -0.127358 | 5.577930  | 0.022149  |
| C | 0.623800  | 0.123298  | -5.557577 |
| C | 0.514386  | 1.128938  | -6.527489 |
| H | 0.517041  | 0.853096  | -7.590168 |
| C | 0.400928  | 2.495351  | -6.144632 |
| C | 1.132779  | -6.035588 | -2.432294 |
| C | 1.172843  | -6.414050 | -1.061755 |
| H | 1.255696  | -7.473024 | -0.784122 |

|   |           |           |           |
|---|-----------|-----------|-----------|
| C | 1.000242  | -2.311608 | 6.121136  |
| C | 0.890700  | -0.945499 | 6.502835  |
| H | 0.897641  | -0.667838 | 7.565069  |
| C | -0.330726 | 6.529629  | 1.031213  |
| H | -0.512211 | 7.576548  | 0.754232  |
| C | -0.307614 | 6.148039  | 2.402203  |
| H | 0.712046  | -0.931487 | -5.855860 |
| H | 0.287235  | 3.935289  | -4.495639 |
| H | 0.999056  | -4.393857 | -3.878073 |
| H | 1.141912  | -5.739796 | 1.007597  |
| H | 1.081798  | -3.753623 | 4.473330  |
| H | 0.684603  | 1.114782  | 5.831304  |
| H | -0.067588 | 4.519653  | 3.848886  |
| H | -0.149893 | 5.873837  | -1.036531 |
| S | -2.724302 | 1.121199  | -2.384376 |
| C | -2.867065 | 2.565769  | -1.592260 |
| N | -2.990466 | 3.611369  | -1.029280 |
| O | -0.499259 | 7.007676  | 3.425586  |
| O | 0.297977  | 3.514944  | -7.022052 |
| O | 1.186251  | -6.912618 | -3.457248 |
| O | 1.109910  | -3.331888 | 6.999358  |
| C | 1.275795  | -8.317116 | -3.172378 |
| H | 0.392706  | -8.661049 | -2.594259 |

|   |           |           |           |
|---|-----------|-----------|-----------|
| H | 1.297709  | -8.822549 | -4.154445 |
| H | 2.205101  | -8.549895 | -2.611620 |
| C | 1.102320  | -3.046809 | 8.406357  |
| H | 0.152957  | -2.555694 | 8.706505  |
| H | 1.191434  | -4.024884 | 8.912264  |
| H | 1.962307  | -2.402894 | 8.685788  |
| C | -0.752320 | 8.391455  | 3.139545  |
| H | -1.677067 | 8.509064  | 2.536992  |
| H | -0.883111 | 8.882586  | 4.120470  |
| H | 0.105358  | 8.849816  | 2.604222  |
| C | 0.309384  | 3.232806  | -8.430141 |
| H | -0.549549 | 2.588800  | -8.712079 |
| H | 0.220719  | 4.212059  | -8.933654 |
| H | 1.260020  | 2.743177  | -8.728099 |

### **MeO - Stage V**

E = -4488.721313

G = -4488.252212

|   |           |           |          |
|---|-----------|-----------|----------|
| S | -1.695843 | -0.377325 | 0.063141 |
| C | -2.173203 | 0.320079  | 1.510143 |
| N | -2.559840 | 0.780430  | 2.534246 |

|    |           |           |           |
|----|-----------|-----------|-----------|
| Co | 0.469364  | 0.089914  | -0.034231 |
| C  | 0.642415  | 0.472212  | 2.911072  |
| C  | 0.717799  | -0.281786 | 4.145386  |
| C  | 0.817203  | -1.643507 | 3.777911  |
| C  | 0.814298  | -1.675515 | 2.306996  |
| N  | 0.731509  | -0.386083 | 1.808661  |
| C  | 0.069634  | 3.030618  | -0.392594 |
| C  | -0.025698 | 4.262088  | 0.371112  |
| C  | 0.129851  | 3.904158  | 1.728296  |
| C  | 0.324884  | 2.447887  | 1.751735  |
| N  | 0.292050  | 1.943114  | 0.469999  |
| C  | 0.556443  | -0.241336 | -2.992870 |
| C  | 0.465971  | 0.501790  | -4.228333 |
| C  | 0.234976  | 1.852492  | -3.871295 |
| C  | 0.149783  | 1.875161  | -2.394829 |
| N  | 0.407894  | 0.596158  | -1.896595 |
| C  | 0.906148  | -2.830965 | 0.305301  |
| C  | 1.042994  | -4.060329 | -0.449230 |
| C  | 1.011938  | -3.695985 | -1.815794 |
| C  | 0.843747  | -2.233765 | -1.849163 |
| N  | 0.804063  | -1.739153 | -0.550299 |
| N  | 0.892655  | -2.808121 | 1.634925  |
| N  | 0.498381  | 1.788471  | 2.887341  |

|   |           |           |           |
|---|-----------|-----------|-----------|
| N | 0.045655  | 3.004743  | -1.714154 |
| N | 0.751290  | -1.563092 | -2.975424 |
| C | 0.164418  | 2.863258  | -4.815805 |
| C | 1.120575  | -4.633597 | -2.832265 |
| C | 1.188949  | -5.402875 | -0.066913 |
| C | 0.893209  | -2.659491 | 4.719071  |
| C | 0.693836  | 0.097567  | 5.496397  |
| C | 0.080423  | 4.841604  | 2.752471  |
| C | -0.235034 | 5.597463  | 0.001802  |
| C | 0.593067  | 0.126151  | -5.578181 |
| C | 0.505413  | 1.124380  | -6.556072 |
| H | 0.600458  | 0.851062  | -7.615042 |
| C | 0.303131  | 2.484184  | -6.184270 |
| C | 1.262544  | -6.001588 | -2.445007 |
| C | 1.297052  | -6.374406 | -1.074106 |
| H | 1.408036  | -7.429554 | -0.791706 |
| C | 0.862266  | -2.275793 | 6.095260  |
| C | 0.766721  | -0.908757 | 6.472024  |
| H | 0.745648  | -0.629133 | 7.533430  |
| C | -0.291084 | 6.568021  | 1.015680  |
| H | -0.458420 | 7.618196  | 0.742627  |
| C | -0.136661 | 6.201035  | 2.379721  |
| H | 0.763929  | -0.921981 | -5.863458 |



|   |           |           |           |
|---|-----------|-----------|-----------|
| H | -0.004854 | 3.916757  | -4.553098 |
| H | 1.096429  | -4.366338 | -3.898145 |
| H | 1.216033  | -5.694511 | 0.992991  |
| H | 0.968278  | -3.722069 | 4.448242  |
| H | 0.617031  | 1.154256  | 5.790773  |
| H | 0.197314  | 4.574903  | 3.812294  |
| H | -0.361475 | 5.885047  | -1.052005 |
| S | -2.679974 | 1.579800  | -2.805278 |
| C | -2.815789 | 2.382824  | -1.376312 |
| N | -2.866253 | 2.984396  | -0.342494 |
| O | -0.180244 | 7.077099  | 3.407257  |
| O | 0.226251  | 3.499040  | -7.067473 |
| O | 1.354765  | -6.875253 | -3.467214 |
| O | 0.927716  | -3.296804 | 6.971767  |
| C | 1.482221  | -8.277556 | -3.182097 |
| H | 0.602626  | -8.646080 | -2.614053 |
| H | 1.529971  | -8.780639 | -4.164300 |
| H | 2.411626  | -8.482029 | -2.610860 |
| C | 0.888294  | -3.015204 | 8.379958  |
| H | -0.060444 | -2.508671 | 8.654438  |
| H | 0.947753  | -3.996111 | 8.884275  |
| H | 1.751413  | -2.385771 | 8.681049  |
| C | -0.393706 | 8.468766  | 3.127818  |

|   |           |          |           |
|---|-----------|----------|-----------|
| H | -1.372259 | 8.628164 | 2.628307  |
| H | -0.390070 | 8.977140 | 4.108672  |
| H | 0.421391  | 8.875555 | 2.493162  |
| C | 0.360117  | 3.222552 | -8.470803 |
| H | -0.445067 | 2.542432 | -8.818190 |
| H | 0.268016  | 4.198939 | -8.979094 |
| H | 1.351791  | 2.776317 | -8.692973 |

### **H - Stage I**

E = -3540.229927

G = -3539.878024

|    |           |           |           |
|----|-----------|-----------|-----------|
| S  | -1.846849 | 0.636103  | -0.762555 |
| C  | -2.125691 | 2.020051  | 0.146029  |
| N  | -2.385274 | 3.006662  | 0.753304  |
| Co | 0.102315  | -0.090149 | -0.008581 |
| C  | -1.272654 | -2.515561 | 1.034715  |
| C  | -1.669563 | -3.864138 | 0.643330  |
| C  | -1.175036 | -4.060775 | -0.668503 |
| C  | -0.504744 | -2.820717 | -1.045786 |
| N  | -0.560291 | -1.912739 | 0.004677  |
| C  | -0.174787 | 1.214639  | 2.653157  |

|   |           |           |           |
|---|-----------|-----------|-----------|
| C | -0.767838 | 1.003189  | 3.969295  |
| C | -1.382856 | -0.270850 | 3.929949  |
| C | -1.129771 | -0.809661 | 2.597863  |
| N | -0.384342 | 0.097663  | 1.851929  |
| C | 1.415982  | 2.347928  | -1.070229 |
| C | 1.769021  | 3.711408  | -0.689978 |
| C | 1.448499  | 3.838630  | 0.682746  |
| C | 0.889294  | 2.556326  | 1.095909  |
| N | 0.895178  | 1.667924  | 0.026843  |
| C | 0.610934  | -1.496313 | -2.585895 |
| C | 1.163443  | -1.267757 | -3.917013 |
| C | 1.604243  | 0.077174  | -3.940833 |
| C | 1.325531  | 0.625116  | -2.617777 |
| N | 0.749855  | -0.349417 | -1.810951 |
| N | 0.046655  | -2.641792 | -2.236540 |
| N | -1.551415 | -2.007746 | 2.225097  |
| N | 0.434274  | 2.341410  | 2.320321  |
| N | 1.615197  | 1.874974  | -2.289865 |
| C | 1.665332  | 5.041587  | 1.375273  |
| C | 2.186926  | 0.634468  | -5.091578 |
| C | 1.290369  | -2.097552 | -5.043827 |
| C | -1.371118 | -5.274407 | -1.348740 |
| C | -2.373518 | -4.876532 | 1.317086  |

|   |           |           |           |
|---|-----------|-----------|-----------|
| C | -2.063749 | -0.787689 | 5.045032  |
| C | -0.817523 | 1.802846  | 5.123350  |
| C | 2.319399  | 4.783055  | -1.413252 |
| C | 2.533312  | 5.987506  | -0.722658 |
| H | 2.957666  | 6.851319  | -1.257248 |
| C | 2.211373  | 6.114832  | 0.651783  |
| C | 2.312731  | -0.193998 | -6.219076 |
| C | 1.871567  | -1.540706 | -6.195229 |
| H | 1.987193  | -2.160025 | -7.098069 |
| C | -2.077599 | -6.285830 | -0.676809 |
| C | -2.571814 | -6.089628 | 0.636911  |
| H | -3.120303 | -6.905653 | 1.132149  |
| C | -1.500507 | 1.288121  | 6.237908  |
| H | -1.561674 | 1.886262  | 7.160136  |
| C | -2.114716 | 0.011408  | 6.199286  |
| H | 2.567334  | 4.682876  | -2.480227 |
| H | 1.413096  | 5.138483  | 2.441516  |
| H | 2.528901  | 1.679772  | -5.107792 |
| H | 0.947230  | -3.142384 | -5.023714 |
| H | -0.984826 | -5.425269 | -2.367560 |
| H | -2.754169 | -4.723657 | 2.337731  |
| H | 2.762054  | 0.208230  | -7.140138 |
| H | 2.392105  | 7.074934  | 1.159365  |

|   |           |           |           |
|---|-----------|-----------|-----------|
| H | -2.251351 | -7.250612 | -1.177931 |
| H | -2.540136 | -1.778617 | 5.012569  |
| H | -2.642095 | -0.358428 | 7.092131  |
| H | -0.340800 | 2.793708  | 5.150967  |

## H - Stage II

E = -3540.036491

G = -3539.685720

|    |           |           |           |
|----|-----------|-----------|-----------|
| S  | -1.842548 | 0.656026  | -0.762976 |
| C  | -2.116148 | 2.020329  | 0.175480  |
| N  | -2.363911 | 2.993510  | 0.808156  |
| Co | 0.106024  | -0.090997 | -0.009167 |
| C  | -1.285471 | -2.504673 | 1.026480  |
| C  | -1.695237 | -3.851910 | 0.631589  |
| C  | -1.202640 | -4.048730 | -0.677827 |
| C  | -0.520879 | -2.810017 | -1.051077 |
| N  | -0.571666 | -1.901931 | -0.001294 |
| C  | -0.163026 | 1.208665  | 2.650275  |
| C  | -0.743394 | 0.992250  | 3.974672  |
| C  | -1.362197 | -0.276747 | 3.934336  |
| C  | -1.123828 | -0.808740 | 2.593446  |

|   |           |           |           |
|---|-----------|-----------|-----------|
| N | -0.382680 | 0.098107  | 1.844088  |
| C | 1.408275  | 2.345595  | -1.072668 |
| C | 1.744467  | 3.718311  | -0.698621 |
| C | 1.427004  | 3.845368  | 0.671978  |
| C | 0.885007  | 2.553968  | 1.090386  |
| N | 0.895606  | 1.662110  | 0.024942  |
| C | 0.611881  | -1.495464 | -2.581689 |
| C | 1.183880  | -1.274932 | -3.909393 |
| C | 1.629783  | 0.065296  | -3.932184 |
| C | 1.333680  | 0.619532  | -2.612103 |
| N | 0.746021  | -0.348778 | -1.807285 |
| N | 0.039029  | -2.638486 | -2.238684 |
| N | -1.558702 | -2.001741 | 2.219949  |
| N | 0.442874  | 2.337504  | 2.319122  |
| N | 1.615175  | 1.872585  | -2.291011 |
| C | 1.627267  | 5.047267  | 1.362121  |
| C | 2.227945  | 0.618885  | -5.071127 |
| C | 1.319853  | -2.110666 | -5.024956 |
| C | -1.403272 | -5.253801 | -1.362546 |
| C | -2.404585 | -4.854502 | 1.304718  |
| C | -2.033300 | -0.799693 | 5.046801  |
| C | -0.775715 | 1.786632  | 5.127399  |
| C | 2.275505  | 4.788880  | -1.429055 |

|   |           |           |           |
|---|-----------|-----------|-----------|
| C | 2.474238  | 6.003583  | -0.740025 |
| H | 2.883339  | 6.870385  | -1.280757 |
| C | 2.156889  | 6.130195  | 0.629608  |
| C | 2.366953  | -0.218597 | -6.197688 |
| C | 1.922247  | -1.558066 | -6.174634 |
| H | 2.047046  | -2.182827 | -7.071966 |
| C | -2.120376 | -6.265483 | -0.690122 |
| C | -2.611879 | -6.069426 | 0.618374  |
| H | -3.166587 | -6.880993 | 1.113048  |
| C | -1.451826 | 1.265228  | 6.250390  |
| H | -1.500078 | 1.859576  | 7.175313  |
| C | -2.069036 | -0.003587 | 6.210717  |
| H | 2.521564  | 4.688878  | -2.496092 |
| H | 1.378128  | 5.144040  | 2.428720  |
| H | 2.573015  | 1.662746  | -5.087276 |
| H | 0.971896  | -3.153494 | -5.005930 |
| H | -1.017372 | -5.405447 | -2.380989 |
| H | -2.784285 | -4.701655 | 2.325303  |
| H | 2.830622  | 0.179982  | -7.112683 |
| H | 2.324425  | 7.093345  | 1.135005  |
| H | -2.299689 | -7.226759 | -1.195077 |
| H | -2.514429 | -1.787856 | 5.013483  |
| H | -2.589188 | -0.378220 | 7.105270  |

H -0.295694 2.775439 5.155734

**H - Stage III-a**

E = -3539.807726

G = -3539.458916

S -2.048935 0.815221 -0.867392

C -2.169467 2.204691 0.044104

N -2.235664 3.199315 0.692963

Co -0.017361 -0.036994 -0.050843

C -1.477590 -2.401412 0.971625

C -2.045313 -3.669217 0.508127

C -1.515973 -3.891824 -0.783900

C -0.655760 -2.747831 -1.079811

N -0.671027 -1.855501 -0.026010

C -0.056367 1.184848 2.666582

C -0.386555 0.846235 4.049247

C -1.068769 -0.391260 4.002340

C -1.096932 -0.795261 2.595146

N -0.465044 0.149515 1.816734

C 1.260726 2.387644 -1.132818

C 1.391053 3.809287 -0.819348



|   |           |           |           |
|---|-----------|-----------|-----------|
| C | 1.092257  | 3.942042  | 0.556323  |
| C | 0.764563  | 2.599564  | 1.036731  |
| N | 0.855648  | 1.686685  | 0.005013  |
| C | 0.704326  | -1.549494 | -2.514194 |
| C | 1.506048  | -1.410301 | -3.728115 |
| C | 1.924878  | -0.060787 | -3.776177 |
| C | 1.391487  | 0.579031  | -2.571623 |
| N | 0.695228  | -0.340644 | -1.814348 |
| N | 0.045712  | -2.649790 | -2.204850 |
| N | -1.661648 | -1.929177 | 2.189177  |
| N | 0.470367  | 2.335459  | 2.306226  |
| N | 1.554855  | 1.870943  | -2.310674 |
| C | 1.138250  | 5.180409  | 1.200485  |
| C | 2.685404  | 0.432410  | -4.838147 |
| C | 1.831140  | -2.315038 | -4.743742 |
| C | -1.814201 | -5.048270 | -1.510566 |
| C | -2.892266 | -4.596071 | 1.120237  |
| C | -1.562249 | -0.999871 | 5.158636  |
| C | -0.178867 | 1.523102  | 5.254978  |
| C | 1.744960  | 4.912794  | -1.601050 |
| C | 1.772084  | 6.174413  | -0.960121 |
| H | 2.030935  | 7.069540  | -1.544985 |
| C | 1.476932  | 6.304920  | 0.409656  |

|   |           |           |           |
|---|-----------|-----------|-----------|
| C | 3.031418  | -0.483110 | -5.862730 |
| C | 2.614560  | -1.826119 | -5.816143 |
| H | 2.898808  | -2.509115 | -6.630260 |
| C | -2.686682 | -5.982877 | -0.903492 |
| C | -3.213848 | -5.761612 | 0.382225  |
| H | -3.885030 | -6.510991 | 0.827548  |
| C | -0.663384 | 0.905522  | 6.432237  |
| H | -0.509125 | 1.401224  | 7.402172  |
| C | -1.340225 | -0.327591 | 6.385027  |
| H | 1.986852  | 4.807957  | -2.668423 |
| H | 0.914492  | 5.280328  | 2.272189  |
| H | 2.999023  | 1.485107  | -4.882463 |
| H | 1.493708  | -3.360822 | -4.711573 |
| H | -1.387949 | -5.226526 | -2.508196 |
| H | -3.291132 | -4.431957 | 2.131511  |
| H | 3.634996  | -0.133465 | -6.713544 |
| H | 1.508487  | 7.300522  | 0.876652  |
| H | -2.952741 | -6.901999 | -1.446417 |
| H | -2.101707 | -1.956938 | 5.120270  |
| H | -1.707919 | -0.778315 | 7.318829  |
| H | 0.340532  | 2.491449  | 5.288969  |

**H - Stage III-b**

E = -3539.823858

G = -3539.472726

|    |           |           |           |
|----|-----------|-----------|-----------|
| S  | -1.827854 | 0.681289  | -0.790168 |
| C  | -2.115097 | 2.020762  | 0.177624  |
| N  | -2.360586 | 2.981133  | 0.830132  |
| Co | 0.108450  | -0.086051 | -0.009897 |
| C  | -1.358206 | -2.455693 | 1.001776  |
| C  | -1.919696 | -3.728399 | 0.547750  |
| C  | -1.446018 | -3.922797 | -0.767817 |
| C  | -0.619454 | -2.758082 | -1.083026 |
| N  | -0.590000 | -1.884428 | -0.004547 |
| C  | -0.089536 | 1.189767  | 2.660361  |
| C  | -0.506517 | 0.902247  | 4.033080  |
| C  | -1.111033 | -0.372558 | 4.004044  |
| C  | -1.032454 | -0.834576 | 2.617885  |
| N  | -0.378435 | 0.108031  | 1.835607  |
| C  | 1.333465  | 2.364233  | -1.103728 |
| C  | 1.498863  | 3.781872  | -0.785247 |
| C  | 1.170660  | 3.921566  | 0.580787  |
| C  | 0.793037  | 2.589519  | 1.050589  |
| N  | 0.889870  | 1.668164  | 0.016414  |

|   |           |           |           |
|---|-----------|-----------|-----------|
| C | 0.676566  | -1.521704 | -2.543632 |
| C | 1.408266  | -1.362719 | -3.801203 |
| C | 1.878991  | -0.032142 | -3.820831 |
| C | 1.430913  | 0.580273  | -2.570310 |
| N | 0.753959  | -0.353096 | -1.795889 |
| N | 0.012090  | -2.624614 | -2.239369 |
| N | -1.542302 | -1.991821 | 2.226604  |
| N | 0.431551  | 2.350387  | 2.301560  |
| N | 1.634114  | 1.856837  | -2.287407 |
| C | 1.239300  | 5.156691  | 1.229875  |
| C | 2.603677  | 0.473400  | -4.903251 |
| C | 1.643279  | -2.238937 | -4.863447 |
| C | -1.763613 | -5.069709 | -1.499958 |
| C | -2.727153 | -4.675255 | 1.182942  |
| C | -1.651481 | -0.954007 | 5.153752  |
| C | -0.422108 | 1.647258  | 5.211689  |
| C | 1.910142  | 4.873094  | -1.554711 |
| C | 1.965984  | 6.132722  | -0.908557 |
| H | 2.271825  | 7.018906  | -1.484285 |
| C | 1.638859  | 6.271205  | 0.452106  |
| C | 2.857545  | -0.412728 | -5.979243 |
| C | 2.388890  | -1.738073 | -5.959511 |
| H | 2.600698  | -2.399725 | -6.812502 |

|   |           |           |           |
|---|-----------|-----------|-----------|
| C | -2.595106 | -6.027353 | -0.868703 |
| C | -3.065719 | -5.834742 | 0.442298  |
| H | -3.707195 | -6.599442 | 0.904964  |
| C | -0.957942 | 1.060200  | 6.384786  |
| H | -0.905352 | 1.613168  | 7.334348  |
| C | -1.558587 | -0.210651 | 6.356420  |
| H | 2.174674  | 4.762761  | -2.616099 |
| H | 0.991010  | 5.261404  | 2.295735  |
| H | 2.959411  | 1.513393  | -4.922804 |
| H | 1.266680  | -3.271687 | -4.852334 |
| H | -1.384551 | -5.224895 | -2.520227 |
| H | -3.084782 | -4.529809 | 2.212321  |
| H | 3.429657  | -0.053541 | -6.847555 |
| H | 1.693551  | 7.263724  | 0.923397  |
| H | -2.873812 | -6.940580 | -1.415242 |
| H | -2.130459 | -1.943216 | 5.128183  |
| H | -1.968462 | -0.636726 | 7.284140  |
| H | 0.037537  | 2.645750  | 5.230333  |

#### **H - Stage IV**

E = -4030.902133

G = -4030.550412

|    |           |           |           |
|----|-----------|-----------|-----------|
| S  | -1.721466 | 0.731953  | -0.767513 |
| C  | -2.471094 | 1.454517  | 0.576660  |
| N  | -2.944572 | 1.999829  | 1.510905  |
| Co | 0.343616  | -0.055487 | 0.082314  |
| C  | -0.954337 | -2.507179 | 1.163836  |
| C  | -1.371717 | -3.851348 | 0.765719  |
| C  | -0.930156 | -4.027894 | -0.566416 |
| C  | -0.259065 | -2.785596 | -0.946912 |
| N  | -0.286623 | -1.886957 | 0.114265  |
| C  | 0.022448  | 1.279108  | 2.722110  |
| C  | -0.560848 | 1.069721  | 4.047888  |
| C  | -1.100835 | -0.235770 | 4.041660  |
| C  | -0.826403 | -0.787495 | 2.714390  |
| N  | -0.141520 | 0.141753  | 1.943046  |
| C  | 1.714871  | 2.366948  | -0.970581 |
| C  | 2.110708  | 3.721845  | -0.583019 |
| C  | 1.723331  | 3.877739  | 0.767029  |
| C  | 1.096414  | 2.616252  | 1.163566  |
| N  | 1.107674  | 1.724915  | 0.099432  |
| C  | 0.835880  | -1.455170 | -2.499149 |
| C  | 1.409834  | -1.240785 | -3.828200 |
| C  | 1.892204  | 0.087389  | -3.842524 |

|   |           |           |           |
|---|-----------|-----------|-----------|
| C | 1.606606  | 0.643129  | -2.518849 |
| N | 0.974472  | -0.308224 | -1.729349 |
| N | 0.266796  | -2.599711 | -2.148521 |
| N | -1.210585 | -2.006603 | 2.363516  |
| N | 0.601932  | 2.419913  | 2.376801  |
| N | 1.940201  | 1.880857  | -2.182652 |
| C | 1.954288  | 5.071720  | 1.461311  |
| C | 2.508271  | 0.629645  | -4.976993 |
| C | 1.525610  | -2.073022 | -4.948320 |
| C | -1.174794 | -5.216276 | -1.266794 |
| C | -2.071825 | -4.858015 | 1.443319  |
| C | -1.751482 | -0.764022 | 5.163183  |
| C | -0.652630 | 1.893699  | 5.176114  |
| C | 2.744553  | 4.754070  | -1.285639 |
| C | 2.977762  | 5.959985  | -0.591077 |
| H | 3.470765  | 6.795613  | -1.110488 |
| C | 2.589924  | 6.115918  | 0.756725  |
| C | 2.626500  | -0.204683 | -6.108886 |
| C | 2.144425  | -1.530754 | -6.094750 |
| H | 2.253290  | -2.153836 | -6.995346 |
| C | -1.877972 | -6.232359 | -0.587659 |
| C | -2.318094 | -6.056499 | 0.742405  |
| H | -2.864963 | -6.870937 | 1.241083  |

|   |           |           |           |
|---|-----------|-----------|-----------|
| C | -1.308156 | 1.366495  | 6.309165  |
| H | -1.401837 | 1.984489  | 7.214959  |
| C | -1.847681 | 0.062682  | 6.302754  |
| H | 3.045789  | 4.631600  | -2.336126 |
| H | 1.651328  | 5.191371  | 2.511630  |
| H | 2.883294  | 1.663299  | -4.986164 |
| H | 1.149898  | -3.106369 | -4.935662 |
| H | -0.832880 | -5.350383 | -2.303234 |
| H | -2.415536 | -4.718945 | 2.478511  |
| H | 3.103559  | 0.186309  | -7.020309 |
| H | 2.786702  | 7.070587  | 1.267737  |
| H | -2.089321 | -7.180824 | -1.104318 |
| H | -2.172119 | -1.779993 | 5.155648  |
| H | -2.353968 | -0.316107 | 7.203515  |
| H | -0.233751 | 2.910384  | 5.178766  |
| S | -3.080264 | -1.047995 | -1.010321 |
| C | -4.237909 | -0.339127 | -2.007809 |
| N | -5.082811 | 0.102969  | -2.709044 |

### **H - Stage V**

E = -4030.910372

G = -4030.552815



|    |           |           |           |
|----|-----------|-----------|-----------|
| S  | -1.544177 | 0.836960  | -1.063995 |
| C  | -1.818199 | 2.239960  | -0.189524 |
| N  | -2.044225 | 3.254757  | 0.383741  |
| Co | 0.231674  | -0.043939 | -0.065356 |
| C  | -1.294647 | -2.425730 | 0.900627  |
| C  | -1.574583 | -3.828218 | 0.538569  |
| C  | -0.971273 | -4.035989 | -0.719389 |
| C  | -0.322366 | -2.779605 | -1.081297 |
| N  | -0.494542 | -1.836096 | -0.093183 |
| C  | -0.193438 | 1.270922  | 2.555363  |
| C  | -0.799344 | 1.061059  | 3.869697  |
| C  | -1.409314 | -0.209376 | 3.827968  |
| C  | -1.164522 | -0.739499 | 2.481158  |
| N  | -0.405052 | 0.181612  | 1.740566  |
| C  | 1.714457  | 2.321386  | -1.028894 |
| C  | 2.045980  | 3.696474  | -0.649366 |
| C  | 1.602951  | 3.859104  | 0.680222  |
| C  | 1.000470  | 2.583388  | 1.072693  |
| N  | 1.101395  | 1.664938  | 0.027358  |
| C  | 0.922981  | -1.508543 | -2.560930 |
| C  | 1.590612  | -1.313320 | -3.850263 |
| C  | 2.082203  | 0.009186  | -3.846817 |

|   |           |           |           |
|---|-----------|-----------|-----------|
| C | 1.708047  | 0.583585  | -2.552188 |
| N | 1.031494  | -0.350469 | -1.788260 |
| N | 0.326057  | -2.635752 | -2.237730 |
| N | -1.536690 | -1.947241 | 2.118239  |
| N | 0.452876  | 2.395742  | 2.255491  |
| N | 2.004265  | 1.832543  | -2.224418 |
| C | 1.760699  | 5.068663  | 1.363226  |
| C | 2.776628  | 0.536543  | -4.939603 |
| C | 1.775251  | -2.161090 | -4.946680 |
| C | -1.041505 | -5.275054 | -1.372525 |
| C | -2.247720 | -4.853754 | 1.206244  |
| C | -2.081129 | -0.735652 | 4.933594  |
| C | -0.846081 | 1.861585  | 5.017029  |
| C | 2.665430  | 4.736878  | -1.348233 |
| C | 2.823236  | 5.964905  | -0.666418 |
| H | 3.300040  | 6.810953  | -1.183659 |
| C | 2.380706  | 6.127230  | 0.661430  |
| C | 2.964869  | -0.313790 | -6.052895 |
| C | 2.475031  | -1.634830 | -6.056167 |
| H | 2.639252  | -2.269160 | -6.940125 |
| C | -1.729844 | -6.310990 | -0.710985 |
| C | -2.315717 | -6.105301 | 0.556812  |
| H | -2.839249 | -6.938631 | 1.049337  |

|   |           |           |           |
|---|-----------|-----------|-----------|
| C | -1.526628 | 1.338608  | 6.137560  |
| H | -1.587117 | 1.935642  | 7.059840  |
| C | -2.129843 | 0.064724  | 6.096887  |
| H | 3.009944  | 4.608658  | -2.384390 |
| H | 1.414269  | 5.193055  | 2.399213  |
| H | 3.157702  | 1.567770  | -4.935504 |
| H | 1.392082  | -3.191566 | -4.947515 |
| H | -0.572059 | -5.431660 | -2.354343 |
| H | -2.713006 | -4.691484 | 2.188948  |
| H | 3.504012  | 0.064203  | -6.934509 |
| H | 2.518613  | 7.097545  | 1.161627  |
| H | -1.808237 | -7.299675 | -1.187448 |
| H | -2.556942 | -1.726135 | 4.898801  |
| H | -2.651699 | -0.313276 | 6.988978  |
| H | -0.373825 | 2.854037  | 5.043912  |
| S | -3.796744 | -1.755372 | -0.036719 |
| C | -3.773480 | -0.492562 | 1.013276  |
| N | -3.694297 | 0.389479  | 1.818260  |

### **F - Stage I**

E = -5126.687302

G = -5126.483510

|    |           |           |           |
|----|-----------|-----------|-----------|
| S  | -1.836196 | 0.633526  | -0.768212 |
| C  | -2.114054 | 2.013526  | 0.146497  |
| N  | -2.369029 | 2.997238  | 0.759845  |
| Co | 0.113348  | -0.093591 | -0.005434 |
| C  | -1.285471 | -2.505709 | 1.028812  |
| C  | -1.685045 | -3.850977 | 0.636607  |
| C  | -1.161960 | -4.059611 | -0.666171 |
| C  | -0.479663 | -2.826636 | -1.037248 |
| N  | -0.555202 | -1.916012 | 0.006656  |
| C  | -0.167978 | 1.213121  | 2.651056  |
| C  | -0.760399 | 1.002458  | 3.965140  |
| C  | -1.392038 | -0.267377 | 3.920297  |
| C  | -1.142208 | -0.804262 | 2.588984  |
| N  | -0.387899 | 0.099426  | 1.851653  |
| C  | 1.396289  | 2.351218  | -1.078329 |
| C  | 1.730655  | 3.718763  | -0.703979 |
| C  | 1.425072  | 3.841579  | 0.676359  |
| C  | 0.885543  | 2.555006  | 1.094350  |
| N  | 0.893529  | 1.671140  | 0.024537  |
| C  | 0.651957  | -1.512146 | -2.566224 |
| C  | 1.215300  | -1.288718 | -3.891246 |
| C  | 1.626347  | 0.069208  | -3.927917 |

|   |           |           |           |
|---|-----------|-----------|-----------|
| C | 1.330462  | 0.623272  | -2.613367 |
| N | 0.767136  | -0.355319 | -1.806106 |
| N | 0.093582  | -2.658753 | -2.217447 |
| N | -1.574419 | -1.996116 | 2.214026  |
| N | 0.440896  | 2.338737  | 2.320661  |
| N | 1.598787  | 1.878838  | -2.295784 |
| C | 1.632209  | 5.049221  | 1.355454  |
| C | 2.203273  | 0.615463  | -5.082052 |
| C | 1.374263  | -2.119101 | -5.008458 |
| C | -1.354446 | -5.276912 | -1.332412 |
| C | -2.402552 | -4.859034 | 1.293848  |
| C | -2.071045 | -0.772017 | 5.037251  |
| C | -0.805447 | 1.789806  | 5.122955  |
| C | 2.251728  | 4.801915  | -1.424095 |
| C | 2.455620  | 6.015969  | -0.743543 |
| F | 2.943956  | 7.075847  | -1.394879 |
| C | 2.149847  | 6.138177  | 0.630861  |
| C | 2.360299  | -0.217578 | -6.204479 |
| C | 1.954847  | -1.570939 | -6.166362 |
| F | 2.126386  | -2.328968 | -7.253703 |
| C | -2.077991 | -6.287422 | -0.673833 |
| C | -2.597613 | -6.080451 | 0.623940  |
| F | -3.279367 | -7.067386 | 1.213468  |

|   |           |           |           |
|---|-----------|-----------|-----------|
| C | -1.489238 | 1.283967  | 6.243415  |
| F | -1.555392 | 2.000801  | 7.369382  |
| C | -2.116122 | 0.018252  | 6.199953  |
| F | 2.552535  | 4.733081  | -2.724429 |
| F | 1.356723  | 5.209899  | 2.653096  |
| F | 2.602298  | 1.888251  | -5.163094 |
| F | 1.003111  | -3.402795 | -5.018705 |
| F | -0.879154 | -5.518492 | -2.557958 |
| F | -2.908353 | -4.708075 | 2.521604  |
| F | 2.901746  | 0.265089  | -7.326953 |
| F | 2.356678  | 7.310488  | 1.238110  |
| F | -2.284513 | -7.463621 | -1.274001 |
| F | -2.678981 | -1.962087 | 5.043283  |
| F | -2.756647 | -0.424104 | 7.286389  |
| F | -0.225997 | 2.990923  | 5.207925  |

### **F - Stage II**

E = -5126.488087

G = -5126.284414

|   |           |          |           |
|---|-----------|----------|-----------|
| S | -1.832239 | 0.653004 | -0.770589 |
| C | -2.102973 | 2.020379 | 0.164001  |

|    |           |           |           |
|----|-----------|-----------|-----------|
| N  | -2.345807 | 2.995520  | 0.795179  |
| Co | 0.115971  | -0.094077 | -0.005608 |
| C  | -1.300424 | -2.494855 | 1.020890  |
| C  | -1.714166 | -3.835860 | 0.623756  |
| C  | -1.192621 | -4.044721 | -0.677253 |
| C  | -0.497454 | -2.816136 | -1.043034 |
| N  | -0.567778 | -1.905826 | 0.000991  |
| C  | -0.158104 | 1.208167  | 2.648747  |
| C  | -0.734475 | 0.990795  | 3.970097  |
| C  | -1.368053 | -0.275671 | 3.925431  |
| C  | -1.136365 | -0.804252 | 2.586236  |
| N  | -0.389156 | 0.100895  | 1.844421  |
| C  | 1.389541  | 2.348976  | -1.080585 |
| C  | 1.705597  | 3.723782  | -0.712550 |
| C  | 1.401564  | 3.847214  | 0.665968  |
| C  | 0.880036  | 2.553780  | 1.089374  |
| N  | 0.893977  | 1.666236  | 0.023144  |
| C  | 0.654614  | -1.512642 | -2.561111 |
| C  | 1.238880  | -1.297541 | -3.879608 |
| C  | 1.654277  | 0.056756  | -3.916112 |
| C  | 1.340552  | 0.617226  | -2.607138 |
| N  | 0.764223  | -0.355280 | -1.802277 |
| N  | 0.086515  | -2.656465 | -2.219016 |

|   |           |           |           |
|---|-----------|-----------|-----------|
| N | -1.582021 | -1.990847 | 2.210209  |
| N | 0.447431  | 2.336089  | 2.319791  |
| N | 1.600702  | 1.875986  | -2.296437 |
| C | 1.591169  | 5.056257  | 1.341576  |
| C | 2.245076  | 0.599119  | -5.061222 |
| C | 1.408284  | -2.133808 | -4.986865 |
| C | -1.391095 | -5.255034 | -1.348081 |
| C | -2.437739 | -4.836309 | 1.279298  |
| C | -2.034580 | -0.786766 | 5.043228  |
| C | -0.762821 | 1.772696  | 5.128371  |
| C | 2.206553  | 4.807942  | -1.439485 |
| C | 2.395199  | 6.035213  | -0.761235 |
| F | 2.863731  | 7.090845  | -1.422507 |
| C | 2.092091  | 6.157609  | 0.608161  |
| C | 2.416183  | -0.242869 | -6.185124 |
| C | 2.009489  | -1.590196 | -6.146212 |
| F | 2.189768  | -2.357164 | -7.218999 |
| C | -2.125738 | -6.268835 | -0.689666 |
| C | -2.642683 | -6.062211 | 0.603298  |
| F | -3.329722 | -7.036794 | 1.194726  |
| C | -1.437018 | 1.259653  | 6.261543  |
| F | -1.482184 | 1.973165  | 7.384074  |
| C | -2.064929 | 0.000525  | 6.218251  |



|   |           |           |           |
|---|-----------|-----------|-----------|
| F | 2.504445  | 4.742557  | -2.733259 |
| F | 1.318575  | 5.219810  | 2.631983  |
| F | 2.645898  | 1.863503  | -5.145288 |
| F | 1.036120  | -3.409626 | -5.000016 |
| F | -0.920327 | -5.498788 | -2.567043 |
| F | -2.941401 | -4.688986 | 2.500480  |
| F | 2.971388  | 0.239839  | -7.294215 |
| F | 2.278803  | 7.327087  | 1.215295  |
| F | -2.334706 | -7.434425 | -1.297402 |
| F | -2.642980 | -1.968434 | 5.052678  |
| F | -2.692366 | -0.452460 | 7.301192  |
| F | -0.184727 | 2.966259  | 5.215553  |

**F - Stage III-a**

E = -5126.255379

G = -5126.053405

|    |           |           |           |
|----|-----------|-----------|-----------|
| S  | -2.064445 | 0.774559  | -0.814595 |
| C  | -2.132659 | 2.224813  | 0.002404  |
| N  | -2.171735 | 3.258399  | 0.590007  |
| Co | 0.001355  | -0.056911 | -0.043531 |
| C  | -1.397556 | -2.458069 | 0.990609  |

|   |           |           |           |
|---|-----------|-----------|-----------|
| C | -1.833681 | -3.790021 | 0.582828  |
| C | -1.302681 | -4.004039 | -0.713047 |
| C | -0.575957 | -2.791174 | -1.065360 |
| N | -0.663710 | -1.875021 | -0.033950 |
| C | -0.118381 | 1.187481  | 2.662023  |
| C | -0.602895 | 0.922839  | 4.009538  |
| C | -1.284496 | -0.318396 | 3.953222  |
| C | -1.150266 | -0.799802 | 2.582243  |
| N | -0.441384 | 0.117385  | 1.831533  |
| C | 1.318577  | 2.365834  | -1.100317 |
| C | 1.585006  | 3.754190  | -0.744571 |
| C | 1.296377  | 3.874404  | 0.637213  |
| C | 0.832930  | 2.563579  | 1.075505  |
| N | 0.850398  | 1.678654  | 0.013242  |
| C | 0.660114  | -1.527709 | -2.549253 |
| C | 1.329787  | -1.338655 | -3.828488 |
| C | 1.737906  | 0.017793  | -3.870054 |
| C | 1.334435  | 0.607386  | -2.598244 |
| N | 0.710821  | -0.346370 | -1.815957 |
| N | 0.065321  | -2.659796 | -2.218948 |
| N | -1.644725 | -1.966913 | 2.191900  |
| N | 0.467660  | 2.321203  | 2.327502  |
| N | 1.554749  | 1.881186  | -2.306419 |

|   |           |           |           |
|---|-----------|-----------|-----------|
| C | 1.458731  | 5.089602  | 1.305206  |
| C | 2.384958  | 0.541618  | -4.989760 |
| C | 1.565209  | -2.197580 | -4.905524 |
| C | -1.500226 | -5.212792 | -1.384829 |
| C | -2.566234 | -4.783737 | 1.233453  |
| C | -1.914286 | -0.844972 | 5.081913  |
| C | -0.545726 | 1.664245  | 5.192270  |
| C | 2.038543  | 4.847663  | -1.484641 |
| C | 2.197634  | 6.092517  | -0.813120 |
| F | 2.618043  | 7.151014  | -1.490797 |
| C | 1.913006  | 6.210862  | 0.555641  |
| C | 2.631126  | -0.328601 | -6.089512 |
| C | 2.231369  | -1.673481 | -6.047164 |
| F | 2.476441  | -2.464594 | -7.081917 |
| C | -2.250447 | -6.228661 | -0.730088 |
| C | -2.775420 | -6.017442 | 0.553577  |
| F | -3.470348 | -6.977690 | 1.145989  |
| C | -1.184285 | 1.134352  | 6.346556  |
| F | -1.139464 | 1.810127  | 7.485782  |
| C | -1.859333 | -0.095228 | 6.290887  |
| F | 2.320877  | 4.787350  | -2.774351 |
| F | 1.204307  | 5.253543  | 2.591565  |
| F | 2.778042  | 1.799643  | -5.083865 |

|   |           |           |           |
|---|-----------|-----------|-----------|
| F | 1.202762  | -3.467794 | -4.914768 |
| F | -1.022120 | -5.462781 | -2.590923 |
| F | -3.073709 | -4.639410 | 2.444920  |
| F | 3.248887  | 0.138974  | -7.163962 |
| F | 2.065655  | 7.381082  | 1.159124  |
| F | -2.456303 | -7.385710 | -1.343200 |
| F | -2.566148 | -1.994709 | 5.084292  |
| F | -2.448286 | -0.570129 | 7.378644  |
| F | 0.075875  | 2.825890  | 5.291568  |

**F - Stage III-b**

E = -5126.272042

G = -5126.067037

|    |           |           |           |
|----|-----------|-----------|-----------|
| S  | -1.836556 | 0.684766  | -0.762290 |
| C  | -2.088992 | 2.037167  | 0.197504  |
| N  | -2.309957 | 3.002818  | 0.850619  |
| Co | 0.111425  | -0.092773 | -0.009500 |
| C  | -1.327858 | -2.479124 | 1.008968  |
| C  | -1.768073 | -3.808337 | 0.601473  |
| C  | -1.248717 | -4.017936 | -0.698616 |
| C  | -0.528365 | -2.801889 | -1.054284 |

|   |           |           |           |
|---|-----------|-----------|-----------|
| N | -0.587245 | -1.894166 | -0.007335 |
| C | -0.127342 | 1.195165  | 2.650925  |
| C | -0.671738 | 0.964117  | 3.982843  |
| C | -1.317661 | -0.294179 | 3.936534  |
| C | -1.123266 | -0.806855 | 2.585675  |
| N | -0.386842 | 0.101006  | 1.837181  |
| C | 1.360512  | 2.352907  | -1.092288 |
| C | 1.641783  | 3.737225  | -0.734247 |
| C | 1.355581  | 3.857189  | 0.646897  |
| C | 0.874679  | 2.552248  | 1.081656  |
| N | 0.893328  | 1.661479  | 0.018556  |
| C | 0.656864  | -1.515534 | -2.557395 |
| C | 1.280409  | -1.314046 | -3.859486 |
| C | 1.696834  | 0.038191  | -3.897177 |
| C | 1.343274  | 0.612057  | -2.604999 |
| N | 0.746819  | -0.352041 | -1.805533 |
| N | 0.074180  | -2.654150 | -2.222735 |
| N | -1.593291 | -1.982914 | 2.205280  |
| N | 0.471378  | 2.326357  | 2.320823  |
| N | 1.582234  | 1.877619  | -2.305249 |
| C | 1.528343  | 5.069389  | 1.318058  |
| C | 2.318531  | 0.571023  | -5.028149 |
| C | 1.481753  | -2.161889 | -4.950210 |

|   |           |           |           |
|---|-----------|-----------|-----------|
| C | -1.461183 | -5.220084 | -1.376459 |
| C | -2.502833 | -4.800866 | 1.252922  |
| C | -1.972166 | -0.809391 | 5.057461  |
| C | -0.674501 | 1.736858  | 5.145457  |
| C | 2.106250  | 4.827838  | -1.472163 |
| C | 2.278362  | 6.069334  | -0.797471 |
| F | 2.710042  | 7.124639  | -1.472969 |
| C | 1.994020  | 6.187961  | 0.571257  |
| C | 2.527993  | -0.286521 | -6.144489 |
| C | 2.121877  | -1.628739 | -6.104108 |
| F | 2.332228  | -2.411380 | -7.153008 |
| C | -2.212416 | -6.235255 | -0.720916 |
| C | -2.725363 | -6.028845 | 0.568284  |
| F | -3.422928 | -6.988049 | 1.160206  |
| C | -1.338716 | 1.218695  | 6.292750  |
| F | -1.351920 | 1.925888  | 7.413579  |
| C | -1.978503 | -0.028764 | 6.247730  |
| F | 2.386230  | 4.768844  | -2.762351 |
| F | 1.276546  | 5.231661  | 2.604949  |
| F | 2.718428  | 1.827271  | -5.116191 |
| F | 1.112357  | -3.430435 | -4.965074 |
| F | -0.995905 | -5.465826 | -2.588690 |
| F | -3.002264 | -4.658053 | 2.467966  |

|   |           |           |           |
|---|-----------|-----------|-----------|
| F | 3.117202  | 0.190877  | -7.231658 |
| F | 2.159175  | 7.354873  | 1.177730  |
| F | -2.430089 | -7.387425 | -1.339218 |
| F | -2.591476 | -1.976603 | 5.067966  |
| F | -2.593105 | -0.491519 | 7.327225  |
| F | -0.089364 | 2.918128  | 5.235784  |

**F - Stage IV**

E = -5617.355062

G = -5617.150502

|    |           |           |           |
|----|-----------|-----------|-----------|
| S  | -1.793622 | 0.810549  | -0.815944 |
| C  | -2.551354 | 1.472033  | 0.555588  |
| N  | -3.025552 | 1.981300  | 1.508976  |
| Co | 0.316302  | -0.041543 | 0.072572  |
| C  | -0.999799 | -2.484097 | 1.150320  |
| C  | -1.390906 | -3.835152 | 0.763350  |
| C  | -0.939785 | -4.016523 | -0.569103 |
| C  | -0.292281 | -2.768692 | -0.958097 |
| N  | -0.342694 | -1.864729 | 0.095745  |
| C  | -0.041278 | 1.308820  | 2.697067  |
| C  | -0.636462 | 1.105584  | 4.014274  |

|   |           |           |           |
|---|-----------|-----------|-----------|
| C | -1.182734 | -0.201978 | 4.006081  |
| C | -0.894946 | -0.758544 | 2.688072  |
| N | -0.204397 | 0.169322  | 1.923600  |
| C | 1.696128  | 2.373222  | -0.978693 |
| C | 2.109776  | 3.717171  | -0.586244 |
| C | 1.709192  | 3.879103  | 0.763587  |
| C | 1.059950  | 2.630537  | 1.151630  |
| N | 1.071288  | 1.743334  | 0.086297  |
| C | 0.786071  | -1.436484 | -2.512681 |
| C | 1.335202  | -1.215132 | -3.846537 |
| C | 1.828516  | 0.113595  | -3.859045 |
| C | 1.569325  | 0.659825  | -2.530001 |
| N | 0.940895  | -0.293824 | -1.742926 |
| N | 0.227515  | -2.583959 | -2.160597 |
| N | -1.267599 | -1.981563 | 2.344487  |
| N | 0.550233  | 2.443385  | 2.358362  |
| N | 1.918230  | 1.890764  | -2.191041 |
| C | 1.961480  | 5.069136  | 1.451987  |
| C | 2.420974  | 0.650816  | -5.005313 |
| C | 1.424546  | -2.027272 | -4.980429 |
| C | -1.168978 | -5.216186 | -1.250320 |
| C | -2.075749 | -4.851551 | 1.436390  |
| C | -1.834116 | -0.718091 | 5.129721  |



|   |           |           |           |
|---|-----------|-----------|-----------|
| C | -0.735876 | 1.920187  | 5.145564  |
| C | 2.771500  | 4.741908  | -1.268524 |
| C | 3.029734  | 5.947929  | -0.575020 |
| F | 3.655686  | 6.946378  | -1.195170 |
| C | 2.629994  | 6.109522  | 0.764560  |
| C | 2.512065  | -0.167288 | -6.155978 |
| C | 2.019962  | -1.485936 | -6.143897 |
| F | 2.119100  | -2.229903 | -7.244087 |
| C | -1.860049 | -6.246558 | -0.572065 |
| C | -2.307055 | -6.066691 | 0.751141  |
| F | -2.954608 | -7.057146 | 1.361005  |
| C | -1.392998 | 1.400935  | 6.286248  |
| F | -1.506425 | 2.148304  | 7.382646  |
| C | -1.936492 | 0.102756  | 6.277354  |
| F | 3.166102  | 4.638291  | -2.534378 |
| F | 1.604907  | 5.268597  | 2.717612  |
| F | 2.897131  | 1.891112  | -5.066671 |
| F | 0.976304  | -3.278884 | -5.017578 |
| F | -0.767604 | -5.431851 | -2.499355 |
| F | -2.517703 | -4.728111 | 2.684226  |
| F | 3.065758  | 0.313595  | -7.267377 |
| F | 2.883614  | 7.258534  | 1.388207  |
| F | -2.092704 | -7.404074 | -1.187319 |

|   |           |           |           |
|---|-----------|-----------|-----------|
| F | -2.361637 | -1.938276 | 5.170991  |
| F | -2.551347 | -0.355543 | 7.365975  |
| F | -0.242244 | 3.153843  | 5.201140  |
| S | -3.045583 | -0.980686 | -1.106437 |
| C | -4.237800 | -0.301974 | -2.091283 |
| N | -5.105103 | 0.107851  | -2.782663 |

**F - Stage V**

E = -5617.354297

G = -5617.148327

|    |           |           |           |
|----|-----------|-----------|-----------|
| S  | -1.595550 | 0.658780  | -0.812590 |
| C  | -2.633780 | 0.701130  | 0.512820  |
| N  | -3.364220 | 0.729980  | 1.446330  |
| Co | 0.375710  | -0.071080 | 0.187500  |
| C  | -0.761260 | -2.548950 | 1.341760  |
| C  | -0.936370 | -3.967280 | 1.032690  |
| C  | -0.592470 | -4.120120 | -0.332910 |
| C  | -0.201780 | -2.795570 | -0.806200 |
| N  | -0.253810 | -1.884590 | 0.236910  |
| C  | -0.142270 | 1.359900  | 2.709920  |
| C  | -0.934550 | 1.243150  | 3.929500  |

|   |           |           |           |
|---|-----------|-----------|-----------|
| C | -1.419490 | -0.087440 | 3.962320  |
| C | -0.914940 | -0.736280 | 2.756590  |
| N | -0.175890 | 0.165830  | 2.004740  |
| C | 1.885880  | 2.252000  | -0.843470 |
| C | 2.474810  | 3.511420  | -0.397690 |
| C | 2.027440  | 3.709200  | 0.931160  |
| C | 1.189440  | 2.556240  | 1.257060  |
| N | 1.165760  | 1.670980  | 0.194300  |
| C | 0.532100  | -1.365410 | -2.462860 |
| C | 0.742320  | -1.016120 | -3.861810 |
| C | 1.323040  | 0.275550  | -3.866610 |
| C | 1.440950  | 0.675580  | -2.467400 |
| N | 0.936220  | -0.315260 | -1.645960 |
| N | 0.079130  | -2.544890 | -2.074140 |
| N | -1.120910 | -2.017640 | 2.496780  |
| N | 0.532970  | 2.454190  | 2.400840  |
| N | 1.974240  | 1.828470  | -2.091740 |
| C | 2.363930  | 4.863150  | 1.638350  |
| C | 1.640400  | 0.917530  | -5.064120 |
| C | 0.447590  | -1.679120 | -5.053110 |
| C | -0.695430 | -5.359150 | -0.968670 |
| C | -1.386320 | -5.051180 | 1.786280  |
| C | -2.208080 | -0.539880 | 5.021610  |

|   |           |           |           |
|---|-----------|-----------|-----------|
| C | -1.223920 | 2.141210  | 4.958540  |
| C | 3.262460  | 4.466160  | -1.044170 |
| C | 3.611860  | 5.641900  | -0.329620 |
| F | 4.363670  | 6.568110  | -0.914910 |
| C | 3.171800  | 5.835640  | 0.989190  |
| C | 1.343120  | 0.248280  | -6.282250 |
| C | 0.760340  | -1.027830 | -6.276630 |
| F | 0.485760  | -1.628990 | -7.428360 |
| C | -1.144150 | -6.468570 | -0.205190 |
| C | -1.483760 | -6.317120 | 1.148430  |
| F | -1.900080 | -7.370420 | 1.842310  |
| C | -2.031650 | 1.690010  | 6.034240  |
| F | -2.337850 | 2.525180  | 7.021340  |
| C | -2.513940 | 0.371040  | 6.066360  |
| F | 3.695750  | 4.329220  | -2.288930 |
| F | 1.963530  | 5.101760  | 2.879400  |
| F | 2.188470  | 2.122070  | -5.122910 |
| F | -0.103750 | -2.879410 | -5.099350 |
| F | -0.396130 | -5.548620 | -2.245870 |
| F | -1.726780 | -4.959550 | 3.064360  |
| F | 1.617970  | 0.839580  | -7.439050 |
| F | 3.513060  | 6.942740  | 1.638670  |
| F | -1.245710 | -7.663410 | -0.777940 |

|   |           |           |           |
|---|-----------|-----------|-----------|
| F | -2.684980 | -1.774860 | 5.099260  |
| F | -3.270850 | -0.025670 | 7.083700  |
| F | -0.790560 | 3.394380  | 4.974810  |
| S | -3.677780 | 0.938370  | -2.548040 |
| C | -2.896550 | -0.104410 | -3.578880 |
| N | -2.344140 | -0.859930 | -4.316690 |

### **NO<sub>2</sub> - Stage I**

E = -4357.750929

G = -4357.408450

|    |           |           |           |
|----|-----------|-----------|-----------|
| S  | -1.850355 | 0.660453  | -0.781452 |
| C  | -2.160652 | 1.993993  | 0.189370  |
| N  | -2.437631 | 2.945944  | 0.841906  |
| Co | 0.094129  | -0.083882 | -0.014939 |
| C  | -0.198233 | 1.214692  | 2.644912  |
| C  | -0.793304 | 1.001025  | 3.958769  |
| C  | -1.409829 | -0.272415 | 3.912082  |
| C  | -1.157465 | -0.808012 | 2.577744  |
| N  | -0.410287 | 0.102589  | 1.840036  |
| C  | 1.408280  | 2.356029  | -1.066141 |
| C  | 1.759378  | 3.718466  | -0.683056 |

|   |           |           |           |
|---|-----------|-----------|-----------|
| C | 1.431685  | 3.841174  | 0.688762  |
| C | 0.870540  | 2.557830  | 1.098684  |
| N | 0.879151  | 1.676661  | 0.025453  |
| C | 0.602889  | -1.480042 | -2.594181 |
| C | 1.161279  | -1.251095 | -3.921696 |
| C | 1.605794  | 0.093162  | -3.938584 |
| C | 1.322885  | 0.640644  | -2.615387 |
| N | 0.739020  | -0.335377 | -1.818097 |
| C | -1.303078 | -2.502827 | 1.009893  |
| C | -1.704121 | -3.848009 | 0.613442  |
| C | -1.198507 | -4.042382 | -0.694853 |
| C | -0.520947 | -2.803705 | -1.066499 |
| N | -0.584696 | -1.900567 | -0.014179 |
| N | -1.583623 | -2.000683 | 2.201828  |
| N | 0.413319  | 2.341902  | 2.319379  |
| N | 1.615035  | 1.886634  | -2.285508 |
| N | 0.036821  | -2.626255 | -2.251581 |
| C | 2.191829  | 0.657686  | -5.076308 |
| C | -1.388812 | -5.244318 | -1.384173 |
| C | -2.420145 | -4.855690 | 1.282276  |
| C | -2.091661 | -0.797878 | 5.014503  |
| C | -0.840535 | 1.800363  | 5.113604  |
| C | 1.633259  | 5.035650  | 1.387648  |

|   |           |           |           |
|---|-----------|-----------|-----------|
| C | 2.308207  | 4.791033  | -1.406921 |
| C | 1.287524  | -2.082340 | -5.048001 |
| C | 1.871243  | -1.534311 | -6.196373 |
| H | 1.997976  | -2.130880 | -7.109340 |
| C | 2.307029  | -0.188663 | -6.189416 |
| C | -2.107366 | -6.235747 | -0.699071 |
| C | -2.621865 | -6.065644 | 0.607319  |
| H | -3.174043 | -6.891517 | 1.074662  |
| C | -2.126523 | 0.015705  | 6.157038  |
| C | -1.520345 | 1.291691  | 6.226818  |
| H | -1.594085 | 1.866712  | 7.159209  |
| C | 2.514309  | 5.996125  | -0.724819 |
| H | 2.933741  | 6.872919  | -1.235324 |
| C | 2.176148  | 6.095132  | 0.645012  |
| H | 0.941575  | -3.125365 | -5.033011 |
| H | 2.542717  | 1.696961  | -5.112553 |
| H | -1.004860 | -5.416508 | -2.397820 |
| H | -2.809844 | -4.704525 | 2.298796  |
| H | -2.574984 | -1.783182 | 5.001830  |
| H | -0.363513 | 2.789927  | 5.146182  |
| H | 1.381664  | 5.153757  | 2.449382  |
| H | 2.561894  | 4.694450  | -2.471963 |
| N | -2.833811 | -0.489918 | 7.349999  |

|   |           |           |           |
|---|-----------|-----------|-----------|
| O | -2.855577 | 0.223678  | 8.360369  |
| O | -3.369560 | -1.603185 | 7.280042  |
| N | -2.335268 | -7.525338 | -1.379910 |
| O | -2.960188 | -8.403002 | -0.771646 |
| O | -1.889203 | -7.664886 | -2.525709 |
| N | 2.916424  | 0.356672  | -7.417878 |
| O | 3.297005  | 1.534104  | -7.404977 |
| O | 3.016970  | -0.389840 | -8.399365 |
| N | 2.399705  | 7.382776  | 1.331138  |
| O | 2.100257  | 7.462878  | 2.529125  |
| O | 2.874362  | 8.318107  | 0.674943  |

## **NO<sub>2</sub> - Stage II**

E = -4357.541389

G = -4357.200524

|    |           |           |           |
|----|-----------|-----------|-----------|
| S  | -1.844194 | 0.681527  | -0.778597 |
| C  | -2.110839 | 2.040102  | 0.168999  |
| N  | -2.348745 | 3.009538  | 0.810718  |
| Co | 0.098683  | -0.086461 | -0.012979 |
| C  | -0.179563 | 1.205358  | 2.645937  |
| C  | -0.754259 | 0.981509  | 3.973976  |



|   |           |           |           |
|---|-----------|-----------|-----------|
| C | -1.378815 | -0.284317 | 3.924572  |
| C | -1.150765 | -0.807585 | 2.577462  |
| N | -0.411163 | 0.103211  | 1.834282  |
| C | 1.403531  | 2.349687  | -1.066278 |
| C | 1.727968  | 3.727444  | -0.691327 |
| C | 1.402535  | 3.850054  | 0.677780  |
| C | 0.869168  | 2.553954  | 1.095215  |
| N | 0.887285  | 1.666791  | 0.027819  |
| C | 0.607615  | -1.483690 | -2.585089 |
| C | 1.192320  | -1.264272 | -3.909707 |
| C | 1.643146  | 0.074442  | -3.924985 |
| C | 1.338852  | 0.628943  | -2.605916 |
| N | 0.739656  | -0.338772 | -1.811001 |
| C | -1.322453 | -2.489514 | 1.002742  |
| C | -1.744027 | -3.832940 | 0.598652  |
| C | -1.241024 | -4.027151 | -0.707139 |
| C | -0.545016 | -2.792780 | -1.071117 |
| N | -0.599853 | -1.890170 | -0.018666 |
| N | -1.593604 | -1.994307 | 2.198310  |
| N | 0.427530  | 2.334057  | 2.322062  |
| N | 1.620678  | 1.879730  | -2.282592 |
| N | 0.026530  | -2.623869 | -2.251875 |
| C | 2.248248  | 0.634360  | -5.051215 |

|   |           |           |           |
|---|-----------|-----------|-----------|
| C | -1.441833 | -5.219630 | -1.403899 |
| C | -2.470250 | -4.827347 | 1.264864  |
| C | -2.046499 | -0.818562 | 5.027690  |
| C | -0.773788 | 1.770843  | 5.129867  |
| C | 1.577008  | 5.048193  | 1.371836  |
| C | 2.246078  | 4.800989  | -1.425699 |
| C | 1.328548  | -2.102326 | -5.022818 |
| C | 1.937385  | -1.558873 | -6.168782 |
| H | 2.074889  | -2.161843 | -7.076183 |
| C | 2.377115  | -0.221469 | -6.160356 |
| C | -2.175253 | -6.206629 | -0.720536 |
| C | -2.686683 | -6.037241 | 0.580018  |
| H | -3.249781 | -6.857270 | 1.044977  |
| C | -2.055408 | -0.013099 | 6.181110  |
| C | -1.441737 | 1.251758  | 6.254168  |
| H | -1.494591 | 1.819232  | 7.192754  |
| C | 2.424374  | 6.020716  | -0.747411 |
| H | 2.818952  | 6.904005  | -1.266845 |
| C | 2.090888  | 6.118341  | 0.616855  |
| H | 0.976328  | -3.143016 | -5.009771 |
| H | 2.603314  | 1.672282  | -5.087058 |
| H | -1.058370 | -5.392149 | -2.417737 |
| H | -2.858628 | -4.676805 | 2.281732  |

|   |           |           |           |
|---|-----------|-----------|-----------|
| H | -2.538291 | -1.799676 | 5.012829  |
| H | -0.290220 | 2.756890  | 5.164779  |
| H | 1.327192  | 5.166111  | 2.434067  |
| H | 2.498555  | 4.704755  | -2.490838 |
| N | -2.750105 | -0.528297 | 7.384348  |
| O | -2.748429 | 0.175113  | 8.399090  |
| O | -3.292519 | -1.635318 | 7.304297  |
| N | -2.419027 | -7.494898 | -1.410544 |
| O | -3.050290 | -8.365850 | -0.804196 |
| O | -1.975460 | -7.625823 | -2.556097 |
| N | 3.010614  | 0.318537  | -7.385775 |
| O | 3.391369  | 1.493629  | -7.365119 |
| O | 3.123367  | -0.433413 | -8.358617 |
| N | 2.284130  | 7.420282  | 1.297461  |
| O | 1.988459  | 7.491679  | 2.494781  |
| O | 2.728298  | 8.360831  | 0.632139  |

**NO<sub>2</sub> - Stage III-a**

E = -4357.297662

G = -4356.959284

|   |           |          |           |
|---|-----------|----------|-----------|
| S | -2.046659 | 0.787392 | -0.810875 |
|---|-----------|----------|-----------|

|    |           |           |           |
|----|-----------|-----------|-----------|
| C  | -2.379550 | 1.942030  | 0.343081  |
| N  | -2.612403 | 2.755612  | 1.178319  |
| Co | -0.032227 | -0.041423 | -0.066751 |
| C  | -0.358251 | 1.260400  | 2.572976  |
| C  | -1.164810 | 1.144395  | 3.793678  |
| C  | -1.788101 | -0.122875 | 3.735002  |
| C  | -1.337732 | -0.750558 | 2.494072  |
| N  | -0.492590 | 0.126731  | 1.805269  |
| C  | 1.494060  | 2.299415  | -1.025253 |
| C  | 2.109404  | 3.546612  | -0.557013 |
| C  | 1.807333  | 3.644647  | 0.820638  |
| C  | 0.988338  | 2.481103  | 1.150210  |
| N  | 0.857722  | 1.666036  | 0.015347  |
| C  | 0.413377  | -1.397639 | -2.663577 |
| C  | 0.760964  | -1.088269 | -4.054080 |
| C  | 1.216705  | 0.249601  | -4.058785 |
| C  | 1.142338  | 0.718665  | -2.675087 |
| N  | 0.621985  | -0.294491 | -1.865117 |
| C  | -1.245300 | -2.518592 | 1.005963  |
| C  | -1.376383 | -3.951738 | 0.715799  |
| C  | -0.846491 | -4.142123 | -0.581058 |
| C  | -0.443066 | -2.822768 | -1.061774 |
| N  | -0.662794 | -1.872416 | -0.058094 |

|   |           |           |           |
|---|-----------|-----------|-----------|
| N | -1.654838 | -1.980465 | 2.148956  |
| N | 0.410664  | 2.315879  | 2.318602  |
| N | 1.564600  | 1.905254  | -2.293209 |
| N | 0.000900  | -2.600513 | -2.279717 |
| C | 1.648039  | 0.876437  | -5.226872 |
| C | -0.797102 | -5.400755 | -1.180752 |
| C | -1.879980 | -5.012708 | 1.470233  |
| C | -2.629594 | -0.577633 | 4.749746  |
| C | -1.355990 | 2.012723  | 4.869945  |
| C | 2.210356  | 4.738200  | 1.587876  |
| C | 2.838423  | 4.532367  | -1.225356 |
| C | 0.724981  | -1.861306 | -5.217002 |
| C | 1.143910  | -1.241845 | -6.415185 |
| H | 1.129009  | -1.788834 | -7.367365 |
| C | 1.585912  | 0.089767  | -6.395326 |
| C | -1.294370 | -6.463332 | -0.400243 |
| C | -1.827874 | -6.298939 | 0.887707  |
| H | -2.199791 | -7.178323 | 1.430654  |
| C | -2.826405 | 0.317258  | 5.820507  |
| C | -2.218954 | 1.579953  | 5.900893  |
| H | -2.422480 | 2.218448  | 6.771040  |
| C | 3.268145  | 5.642117  | -0.464882 |
| H | 3.844265  | 6.453659  | -0.929364 |

|   |           |           |           |
|---|-----------|-----------|-----------|
| C | 2.948752  | 5.721164  | 0.900382  |
| H | 0.384716  | -2.905927 | -5.210535 |
| H | 2.013301  | 1.911292  | -5.253321 |
| H | -0.396342 | -5.569574 | -2.188827 |
| H | -2.299654 | -4.864681 | 2.474892  |
| H | -3.113712 | -1.562688 | 4.731870  |
| H | -0.864249 | 2.993929  | 4.919224  |
| H | 1.971589  | 4.843095  | 2.654293  |
| H | 3.064155  | 4.461657  | -2.298354 |
| N | -3.722450 | -0.106497 | 6.926313  |
| O | -3.887929 | 0.676253  | 7.864427  |
| O | -4.247248 | -1.219904 | 6.838273  |
| N | -1.244593 | -7.832228 | -0.975072 |
| O | -1.702305 | -8.756343 | -0.299499 |
| O | -0.745575 | -7.960039 | -2.096239 |
| N | 2.016768  | 0.709749  | -7.675039 |
| O | 2.382938  | 1.887593  | -7.641150 |
| O | 1.982064  | 0.013138  | -8.691552 |
| N | 3.407099  | 6.909545  | 1.665282  |
| O | 3.104379  | 6.968511  | 2.859937  |
| O | 4.059729  | 7.764333  | 1.062342  |

**NO<sub>2</sub> - Stage III-b**

E = -4357.313535

G = -4356.972294

|    |           |           |           |
|----|-----------|-----------|-----------|
| S  | -1.857645 | 0.714023  | -0.774817 |
| C  | -2.068117 | 2.091301  | 0.157124  |
| N  | -2.263836 | 3.068991  | 0.800634  |
| Co | 0.078126  | -0.099033 | -0.021295 |
| C  | -0.339783 | 1.238398  | 2.583402  |
| C  | -1.165778 | 1.131354  | 3.791751  |
| C  | -1.804941 | -0.125783 | 3.721536  |
| C  | -1.334313 | -0.759746 | 2.489256  |
| N  | -0.476083 | 0.098846  | 1.809665  |
| C  | 1.571458  | 2.253420  | -0.995348 |
| C  | 2.152114  | 3.518852  | -0.530835 |
| C  | 1.803514  | 3.635946  | 0.831762  |
| C  | 1.009076  | 2.451027  | 1.159127  |
| N  | 0.930760  | 1.611132  | 0.053592  |
| C  | 0.436063  | -1.422951 | -2.643106 |
| C  | 0.754458  | -1.097964 | -4.037765 |
| C  | 1.236354  | 0.229337  | -4.031430 |
| C  | 1.209278  | 0.671904  | -2.636511 |
| N  | 0.701668  | -0.333312 | -1.825412 |

|   |           |           |           |
|---|-----------|-----------|-----------|
| C | -1.222026 | -2.543686 | 1.028881  |
| C | -1.357782 | -3.975462 | 0.735363  |
| C | -0.847928 | -4.159731 | -0.568660 |
| C | -0.437701 | -2.836144 | -1.041245 |
| N | -0.626719 | -1.894371 | -0.038936 |
| N | -1.638110 | -2.002041 | 2.159973  |
| N | 0.417508  | 2.293100  | 2.329869  |
| N | 1.652103  | 1.856804  | -2.253320 |
| N | -0.006338 | -2.610306 | -2.269396 |
| C | 1.640892  | 0.872278  | -5.199609 |
| C | -0.812161 | -5.412798 | -1.176178 |
| C | -1.858108 | -5.037677 | 1.489986  |
| C | -2.659877 | -0.574553 | 4.726039  |
| C | -1.359018 | 2.000560  | 4.866286  |
| C | 2.157724  | 4.749408  | 1.590475  |
| C | 2.874925  | 4.509654  | -1.197063 |
| C | 0.661117  | -1.844727 | -5.213629 |
| C | 1.051921  | -1.208256 | -6.414266 |
| H | 0.991529  | -1.734920 | -7.376094 |
| C | 1.521446  | 0.112249  | -6.382749 |
| C | -1.302743 | -6.480251 | -0.393501 |
| C | -1.817828 | -6.322538 | 0.900530  |
| H | -2.184404 | -7.203356 | 1.444670  |



|   |           |           |           |
|---|-----------|-----------|-----------|
| C | -2.856907 | 0.320631  | 5.799067  |
| C | -2.238262 | 1.575271  | 5.888819  |
| H | -2.441550 | 2.213607  | 6.759126  |
| C | 3.257415  | 5.644239  | -0.444686 |
| H | 3.828963  | 6.459821  | -0.907628 |
| C | 2.896594  | 5.738624  | 0.906599  |
| H | 0.298366  | -2.881828 | -5.217516 |
| H | 2.024494  | 1.900699  | -5.217634 |
| H | -0.427782 | -5.577896 | -2.191219 |
| H | -2.264800 | -4.893009 | 2.500511  |
| H | -3.154502 | -1.554245 | 4.701786  |
| H | -0.853326 | 2.974212  | 4.924720  |
| H | 1.882152  | 4.868999  | 2.646397  |
| H | 3.133357  | 4.425136  | -2.261710 |
| N | -3.766782 | -0.098054 | 6.896399  |
| O | -3.920188 | 0.676492  | 7.842932  |
| O | -4.312755 | -1.199633 | 6.792132  |
| N | -1.264290 | -7.845873 | -0.977785 |
| O | -1.709436 | -8.774169 | -0.299884 |
| O | -0.785721 | -7.966190 | -2.108701 |
| N | 1.915424  | 0.753265  | -7.664035 |
| O | 2.283995  | 1.930000  | -7.620354 |
| O | 1.849246  | 0.074244  | -8.690629 |

|   |          |          |          |
|---|----------|----------|----------|
| N | 3.301975 | 6.951504 | 1.663360 |
| O | 2.964581 | 7.020922 | 2.848149 |
| O | 3.948071 | 7.813788 | 1.064450 |

### **NO<sub>2</sub> - Stage IV**

E = -4848.408648

G = -4848.066038

|    |           |           |           |
|----|-----------|-----------|-----------|
| S  | -2.094044 | 0.681223  | -0.976726 |
| C  | -2.047940 | 2.376015  | -0.836459 |
| N  | -1.966305 | 3.551919  | -0.778315 |
| Co | 0.077632  | -0.086859 | -0.042256 |
| C  | -0.357500 | 1.241758  | 2.580407  |
| C  | -0.865448 | 0.982484  | 3.929845  |
| C  | -1.321985 | -0.355609 | 3.930136  |
| C  | -1.095030 | -0.871738 | 2.579058  |
| N  | -0.502057 | 0.107864  | 1.791830  |
| C  | 1.468686  | 2.334640  | -1.042504 |
| C  | 1.758613  | 3.723320  | -0.675168 |
| C  | 1.253733  | 3.898267  | 0.633197  |
| C  | 0.682914  | 2.610019  | 1.032122  |
| N  | 0.818669  | 1.692055  | 0.001447  |

|   |           |           |           |
|---|-----------|-----------|-----------|
| C | 0.599315  | -1.459499 | -2.624468 |
| C | 1.259939  | -1.260831 | -3.917862 |
| C | 1.817538  | 0.037327  | -3.880068 |
| C | 1.473921  | 0.597673  | -2.571536 |
| N | 0.756639  | -0.332070 | -1.832694 |
| C | -1.258701 | -2.542261 | 0.985959  |
| C | -1.715048 | -3.865774 | 0.553831  |
| C | -1.308038 | -4.003136 | -0.792829 |
| C | -0.608082 | -2.765167 | -1.141971 |
| N | -0.614882 | -1.896881 | -0.059229 |
| N | -1.454338 | -2.093158 | 2.216357  |
| N | 0.154086  | 2.410308  | 2.228942  |
| N | 1.799182  | 1.832154  | -2.221889 |
| N | -0.048931 | -2.575222 | -2.326595 |
| C | 2.518172  | 0.568186  | -4.963469 |
| C | -1.579798 | -5.157329 | -1.528384 |
| C | -2.414152 | -4.879232 | 1.220054  |
| C | -1.874376 | -0.943769 | 5.068845  |
| C | -0.942385 | 1.787854  | 5.072678  |
| C | 1.348800  | 5.119482  | 1.300641  |
| C | 2.381570  | 4.766330  | -1.370718 |
| C | 1.383206  | -2.083742 | -5.043655 |
| C | 2.087937  | -1.569035 | -6.147554 |

|   |           |           |           |
|---|-----------|-----------|-----------|
| H | 2.219978  | -2.162694 | -7.061846 |
| C | 2.633321  | -0.272805 | -6.086071 |
| C | -2.288012 | -6.163505 | -0.844986 |
| C | -2.704527 | -6.049332 | 0.494807  |
| H | -3.252949 | -6.880204 | 0.957951  |
| C | -1.938724 | -0.121674 | 6.208766  |
| C | -1.491175 | 1.213134  | 6.233287  |
| H | -1.577447 | 1.789783  | 7.163745  |
| C | 2.484463  | 6.008514  | -0.717913 |
| H | 2.958636  | 6.868402  | -1.209219 |
| C | 1.972702  | 6.158404  | 0.584789  |
| H | 0.947315  | -3.092055 | -5.072659 |
| H | 2.954309  | 1.575413  | -4.958905 |
| H | -1.270365 | -5.287160 | -2.573409 |
| H | -2.728159 | -4.771846 | 2.267647  |
| H | -2.237592 | -1.979229 | 5.091078  |
| H | -0.589383 | 2.828410  | 5.070632  |
| H | 0.964252  | 5.277157  | 2.316442  |
| H | 2.774501  | 4.628928  | -2.387733 |
| N | -2.509256 | -0.694969 | 7.448818  |
| O | -2.567514 | 0.028283  | 8.448266  |
| O | -2.896130 | -1.868073 | 7.414885  |
| N | -2.609373 | -7.408854 | -1.578165 |

|   |           |           |           |
|---|-----------|-----------|-----------|
| O | -3.228402 | -8.292623 | -0.976935 |
| O | -2.239237 | -7.495710 | -2.754044 |
| N | 3.364612  | 0.239626  | -7.267227 |
| O | 3.842581  | 1.377192  | -7.198565 |
| O | 3.457151  | -0.495265 | -8.255558 |
| N | 2.094619  | 7.480114  | 1.240637  |
| O | 1.643451  | 7.598147  | 2.385097  |
| O | 2.639102  | 8.392151  | 0.610315  |
| S | -3.511136 | 0.209990  | 0.609917  |
| C | -4.920455 | 0.099929  | -0.317523 |
| N | -5.942373 | 0.002707  | -0.903204 |

**NO<sub>2</sub> - Stage V**

E = -4848.408742

G = -4848.063814

|    |           |           |           |
|----|-----------|-----------|-----------|
| S  | -1.849544 | 0.765111  | -0.705354 |
| C  | -2.175351 | 1.979760  | 0.412421  |
| N  | -2.403351 | 2.846946  | 1.186146  |
| Co | 0.086141  | -0.009199 | -0.023162 |
| C  | -0.069627 | 1.225980  | 2.669979  |
| C  | -0.579908 | 0.972837  | 4.020110  |

|   |           |           |           |
|---|-----------|-----------|-----------|
| C | -1.226276 | -0.282464 | 3.968637  |
| C | -1.087746 | -0.766888 | 2.595553  |
| N | -0.348656 | 0.152413  | 1.847571  |
| C | 1.307454  | 2.445952  | -1.097106 |
| C | 1.596676  | 3.833842  | -0.728293 |
| C | 1.351431  | 3.933711  | 0.660138  |
| C | 0.885245  | 2.618474  | 1.096845  |
| N | 0.866928  | 1.743651  | 0.012681  |
| C | 0.627462  | -1.424630 | -2.578283 |
| C | 1.274469  | -1.223323 | -3.877396 |
| C | 1.701891  | 0.123596  | -3.903344 |
| C | 1.326258  | 0.703127  | -2.615116 |
| N | 0.711284  | -0.263096 | -1.825158 |
| C | -1.429444 | -2.360639 | 0.954346  |
| C | -1.964008 | -3.646399 | 0.505957  |
| C | -1.405724 | -3.882680 | -0.771056 |
| C | -0.603951 | -2.702019 | -1.099329 |
| N | -0.625911 | -1.812583 | -0.033826 |
| N | -1.621093 | -1.897470 | 2.184108  |
| N | 0.523473  | 2.366036  | 2.339955  |
| N | 1.543672  | 1.969099  | -2.310908 |
| N | 0.022507  | -2.555216 | -2.255927 |
| C | 2.341821  | 0.672053  | -5.016344 |

|   |           |           |           |
|---|-----------|-----------|-----------|
| C | -1.701287 | -5.034464 | -1.499982 |
| C | -2.847754 | -4.552395 | 1.105980  |
| C | -1.856710 | -0.831485 | 5.086400  |
| C | -0.530159 | 1.731200  | 5.194977  |
| C | 1.536157  | 5.129015  | 1.356836  |
| C | 2.043643  | 4.927295  | -1.478483 |
| C | 1.472086  | -2.080952 | -4.965549 |
| C | 2.120407  | -1.550048 | -6.095858 |
| H | 2.307266  | -2.169295 | -6.983309 |
| C | 2.534447  | -0.204415 | -6.099113 |
| C | -2.590943 | -5.931574 | -0.883512 |
| C | -3.165959 | -5.715765 | 0.383973  |
| H | -3.859427 | -6.463020 | 0.791786  |
| C | -1.796899 | -0.056437 | 6.258820  |
| C | -1.154827 | 1.193637  | 6.335773  |
| H | -1.155505 | 1.738107  | 7.289379  |
| C | 2.227918  | 6.145182  | -0.797390 |
| H | 2.567774  | 7.043710  | -1.329355 |
| C | 1.973727  | 6.220552  | 0.584951  |
| H | 1.136029  | -3.126834 | -4.945959 |
| H | 2.675823  | 1.716616  | -5.060998 |
| H | -1.284866 | -5.234860 | -2.495263 |
| H | -3.285484 | -4.362524 | 2.095739  |

|   |           |           |           |
|---|-----------|-----------|-----------|
| H | -2.370958 | -1.800978 | 5.068088  |
| H | -0.030575 | 2.709104  | 5.231675  |
| H | 1.350731  | 5.228383  | 2.434109  |
| H | 2.239047  | 4.847998  | -2.556913 |
| N | -2.450312 | -0.587988 | 7.478504  |
| O | -2.394990 | 0.092302  | 8.507121  |
| O | -3.014119 | -1.683779 | 7.395723  |
| N | -2.946231 | -7.171100 | -1.614323 |
| O | -3.740622 | -7.950326 | -1.079399 |
| O | -2.426263 | -7.355179 | -2.719519 |
| N | 3.208644  | 0.322111  | -7.309002 |
| O | 3.567696  | 1.504058  | -7.297264 |
| O | 3.374137  | -0.447433 | -8.260114 |
| N | 2.174069  | 7.520468  | 1.268484  |
| O | 1.950155  | 7.570559  | 2.482103  |
| O | 2.552137  | 8.478932  | 0.588532  |
| S | -4.039379 | -0.886439 | -0.211639 |
| C | -3.700536 | -1.754855 | -1.577867 |
| N | -3.423910 | -2.375214 | -2.557863 |

**Binding mode Co-NCS (all energies are in hartree)**



#### 4-ATP - Stage I

E= -4225.364483

G= -4224.912612

|    |           |           |           |
|----|-----------|-----------|-----------|
| N  | -2.671147 | 1.180319  | -0.885307 |
| C  | -3.675037 | 1.512628  | -0.301519 |
| S  | -5.034497 | 1.964356  | 0.456843  |
| Co | -0.931372 | 0.569576  | -0.079059 |
| C  | -2.252834 | -1.880391 | 0.967846  |
| C  | -2.534537 | -3.272632 | 0.616436  |
| C  | -1.997480 | -3.469974 | -0.679172 |
| C  | -1.394409 | -2.197095 | -1.072012 |
| N  | -1.562307 | -1.266773 | -0.061495 |
| C  | -1.729815 | 2.056704  | 2.370235  |
| C  | -2.481364 | 1.895215  | 3.614006  |
| C  | -2.903215 | 0.543636  | 3.650686  |
| C  | -2.403428 | -0.075290 | 2.423753  |
| N  | -1.690896 | 0.854365  | 1.685976  |
| C  | 0.467608  | 2.993955  | -1.100564 |
| C  | 0.728815  | 4.393003  | -0.762784 |
| C  | 0.107064  | 4.622735  | 0.489053  |
| C  | -0.510272 | 3.355563  | 0.878692  |

|   |           |           |           |
|---|-----------|-----------|-----------|
| N | -0.272921 | 2.398916  | -0.094039 |
| C | -0.136118 | -0.914495 | -2.539752 |
| C | 0.691762  | -0.786904 | -3.738436 |
| C | 1.180580  | 0.541869  | -3.742506 |
| C | 0.640050  | 1.179448  | -2.540981 |
| N | -0.132644 | 0.276079  | -1.834870 |
| N | -0.756568 | -2.042774 | -2.223917 |
| N | -2.646482 | -1.342678 | 2.115606  |
| N | -1.185367 | 3.212064  | 2.011748  |
| N | 0.903889  | 2.441111  | -2.225750 |
| C | 0.161535  | 5.882117  | 1.109208  |
| C | 2.057000  | 0.991559  | -4.742169 |
| C | 1.074563  | -1.708644 | -4.724805 |
| C | -2.080406 | -4.716397 | -1.320901 |
| C | -3.177565 | -4.314868 | 1.304259  |
| C | -3.664274 | 0.046922  | 4.721535  |
| C | -2.806865 | 2.788060  | 4.648272  |
| C | 1.423575  | 5.415954  | -1.429498 |
| C | 1.478588  | 6.676239  | -0.809394 |
| H | 2.014131  | 7.501564  | -1.303786 |
| C | 0.855794  | 6.906284  | 0.442176  |
| C | 2.435546  | 0.071205  | -5.736923 |
| C | 1.954470  | -1.260027 | -5.725982 |

|   |           |           |           |
|---|-----------|-----------|-----------|
| H | 2.283346  | -1.957941 | -6.511516 |
| C | -2.723165 | -5.760369 | -0.632742 |
| C | -3.265063 | -5.561959 | 0.660942  |
| H | -3.761246 | -6.402140 | 1.171126  |
| C | -3.568366 | 2.291676  | 5.720614  |
| H | -3.843591 | 2.963861  | 6.548160  |
| C | -3.990982 | 0.940008  | 5.756883  |
| H | 1.906211  | 5.235773  | -2.401708 |
| H | -0.323257 | 6.059068  | 2.080958  |
| H | 2.442367  | 2.022064  | -4.740884 |
| H | 0.715724  | -2.747698 | -4.702519 |
| H | -1.655733 | -4.868102 | -2.324420 |
| H | -3.593895 | -4.160946 | 2.311018  |
| H | 3.125294  | 0.387827  | -6.534739 |
| H | 0.918112  | 7.906487  | 0.898382  |
| H | -2.807308 | -6.751384 | -1.105197 |
| H | -3.993681 | -1.002511 | 4.746726  |
| H | -4.587117 | 0.585295  | 6.612004  |
| H | -2.480093 | 3.838168  | 4.617159  |
| C | 1.399258  | -2.349751 | 0.269362  |
| C | 2.050561  | -3.238539 | -0.583404 |
| C | 3.229691  | -1.379981 | -1.629360 |
| C | 2.591292  | -0.490145 | -0.770860 |

|   |          |           |           |
|---|----------|-----------|-----------|
| C | 2.953464 | -2.790564 | -1.607115 |
| H | 0.676347 | -2.719598 | 1.014169  |
| H | 2.793894 | 0.590738  | -0.835406 |
| H | 1.844804 | -4.317905 | -0.507126 |
| H | 3.944609 | -1.001088 | -2.376461 |
| S | 3.643286 | -3.874776 | -2.762588 |
| C | 1.637934 | -0.958522 | 0.165001  |
| N | 0.822617 | -0.038818 | 0.865274  |
| H | 0.470072 | -0.417283 | 1.756108  |
| H | 1.294875 | 0.859140  | 1.045393  |

#### **4-ATP - Stage II**

E= -4225.2072522

G= -4224.755123

|    |           |           |           |
|----|-----------|-----------|-----------|
| N  | -2.656422 | 1.042123  | -0.811632 |
| C  | -3.655424 | 1.434873  | -0.252810 |
| S  | -5.016913 | 1.968633  | 0.425249  |
| Co | -0.995376 | 0.416470  | -0.043800 |
| C  | -2.465953 | -1.941841 | 1.019548  |
| C  | -2.872389 | -3.298804 | 0.657096  |
| C  | -2.331050 | -3.546604 | -0.627927 |
| C  | -1.602984 | -2.337214 | -1.008092 |
| N  | -1.704730 | -1.394814 | 0.000836  |
| C  | -1.665206 | 1.954339  | 2.411754  |
| C  | -2.382195 | 1.830260  | 3.678859  |
| C  | -2.889634 | 0.508617  | 3.722493  |
| C  | -2.468924 | -0.134975 | 2.480021  |
| N  | -1.715902 | 0.751123  | 1.728244  |
| C  | 0.412272  | 2.796019  | -1.157434 |
| C  | 0.695456  | 4.199085  | -0.860084 |
| C  | 0.138811  | 4.456342  | 0.416500  |
| C  | -0.471764 | 3.203479  | 0.858520  |
| N  | -0.289153 | 2.228927  | -0.107359 |
| C  | -0.255141 | -1.146952 | -2.473638 |

|   |           |           |           |
|---|-----------|-----------|-----------|
| C | 0.633654  | -1.089661 | -3.632539 |
| C | 1.156981  | 0.227629  | -3.667672 |
| C | 0.569149  | 0.932914  | -2.530635 |
| N | -0.231649 | 0.065818  | -1.807163 |
| N | -0.930840 | -2.239300 | -2.147129 |
| N | -2.813136 | -1.377040 | 2.168028  |
| N | -1.093315 | 3.086139  | 2.024015  |
| N | 0.825904  | 2.206895  | -2.271405 |
| C | 0.237998  | 5.724207  | 1.012681  |
| C | 2.130638  | 0.601508  | -4.605196 |
| C | 1.068331  | -2.072040 | -4.533659 |
| C | -2.530237 | -4.775178 | -1.278937 |
| C | -3.631380 | -4.271676 | 1.328098  |
| C | -3.647922 | 0.054399  | 4.814237  |
| C | -2.617940 | 2.736723  | 4.725759  |
| C | 1.369619  | 5.200993  | -1.577418 |
| C | 1.467907  | 6.470383  | -0.982116 |
| H | 1.987748  | 7.281144  | -1.515598 |
| C | 0.909829  | 6.728267  | 0.294230  |
| C | 2.584923  | -0.387694 | -5.493712 |
| C | 2.061324  | -1.706068 | -5.458361 |
| H | 2.445613  | -2.454746 | -6.167598 |
| C | -3.290776 | -5.748669 | -0.608619 |

|   |           |           |           |
|---|-----------|-----------|-----------|
| C | -3.833676 | -5.500346 | 0.676114  |
| H | -4.424189 | -6.286471 | 1.171610  |
| C | -3.375266 | 2.282534  | 5.818878  |
| H | -3.580777 | 2.965387  | 6.657729  |
| C | -3.882820 | 0.960312  | 5.862565  |
| H | 1.802978  | 4.998402  | -2.568079 |
| H | -0.195023 | 5.922616  | 2.004345  |
| H | 2.546129  | 1.619618  | -4.620818 |
| H | 0.672921  | -3.097485 | -4.494193 |
| H | -2.106767 | -4.966248 | -2.276157 |
| H | -4.050728 | -4.078288 | 2.326612  |
| H | 3.365395  | -0.140519 | -6.229201 |
| H | 1.005805  | 7.735016  | 0.729507  |
| H | -3.469225 | -6.723235 | -1.088862 |
| H | -4.043647 | -0.971579 | 4.844883  |
| H | -4.473388 | 0.639722  | 6.734738  |
| H | -2.225790 | 3.763845  | 4.688549  |
| C | 1.781530  | -2.026936 | -0.357663 |
| C | 2.668646  | -2.420718 | -1.354148 |
| C | 3.588587  | -0.145310 | -1.435445 |
| C | 2.701432  | 0.249015  | -0.439159 |
| C | 3.574381  | -1.483034 | -1.950020 |
| H | 1.068527  | -2.744480 | 0.075707  |

|   |          |           |           |
|---|----------|-----------|-----------|
| H | 2.695606 | 1.285269  | -0.068813 |
| H | 2.666353 | -3.458726 | -1.717828 |
| H | 4.298760 | 0.578232  | -1.861973 |
| S | 4.593033 | -1.941766 | -3.259202 |
| C | 1.760812 | -0.677815 | 0.069734  |
| N | 0.720158 | -0.227467 | 0.921834  |
| H | 0.376271 | -0.970570 | 1.549604  |
| H | 0.997582 | 0.589576  | 1.487457  |

**4-ATP - Stage III-a**



E= -4225.0190481

G= -4224.566833

|    |           |           |           |
|----|-----------|-----------|-----------|
| N  | -2.624041 | 1.031895  | -0.828559 |
| C  | -3.615621 | 1.422980  | -0.252002 |
| S  | -4.963009 | 1.953292  | 0.449987  |
| Co | -0.971390 | 0.404915  | -0.035380 |
| C  | -2.481206 | -1.930387 | 1.004026  |
| C  | -2.931529 | -3.271211 | 0.621183  |
| C  | -2.387578 | -3.520992 | -0.659347 |
| C  | -1.611061 | -2.330839 | -1.015255 |
| N  | -1.693311 | -1.394600 | 0.002781  |
| C  | -1.636158 | 1.940502  | 2.416389  |
| C  | -2.329404 | 1.808764  | 3.699817  |
| C  | -2.842093 | 0.492129  | 3.740927  |
| C  | -2.447802 | -0.142366 | 2.481269  |
| N  | -1.698098 | 0.742586  | 1.724962  |
| C  | 0.401079  | 2.790323  | -1.166577 |
| C  | 0.635072  | 4.210844  | -0.895187 |
| C  | 0.084236  | 4.466460  | 0.381167  |
| C  | -0.479392 | 3.196597  | 0.846752  |
| N  | -0.274308 | 2.213880  | -0.102985 |
| C  | -0.214500 | -1.164397 | -2.448991 |

|   |           |           |           |
|---|-----------|-----------|-----------|
| C | 0.695226  | -1.116983 | -3.593711 |
| C | 1.215839  | 0.200360  | -3.631680 |
| C | 0.605503  | 0.913713  | -2.509195 |
| N | -0.202246 | 0.051521  | -1.788928 |
| N | -0.915382 | -2.246908 | -2.138740 |
| N | -2.816490 | -1.374129 | 2.160882  |
| N | -1.082976 | 3.078206  | 2.022125  |
| N | 0.835703  | 2.197353  | -2.267987 |
| C | 0.143537  | 5.739781  | 0.961220  |
| C | 2.195639  | 0.573100  | -4.557884 |
| C | 1.136924  | -2.104585 | -4.480366 |
| C | -2.615443 | -4.730787 | -1.327188 |
| C | -3.725141 | -4.221151 | 1.276310  |
| C | -3.582951 | 0.029785  | 4.835851  |
| C | -2.540201 | 2.708663  | 4.752082  |
| C | 1.266797  | 5.218838  | -1.634316 |
| C | 1.325279  | 6.503770  | -1.056055 |
| H | 1.810399  | 7.323234  | -1.607821 |
| C | 0.773828  | 6.759456  | 0.218236  |
| C | 2.663922  | -0.425306 | -5.437136 |
| C | 2.143464  | -1.741604 | -5.399158 |
| H | 2.532249  | -2.493615 | -6.101647 |
| C | -3.417032 | -5.689054 | -0.672924 |

|   |           |           |           |
|---|-----------|-----------|-----------|
| C | -3.961966 | -5.438773 | 0.605206  |
| H | -4.582316 | -6.209613 | 1.087246  |
| C | -3.281884 | 2.246209  | 5.858641  |
| H | -3.467687 | 2.923719  | 6.705864  |
| C | -3.793628 | 0.930872  | 5.899879  |
| H | 1.698328  | 5.017007  | -2.625538 |
| H | -0.284168 | 5.936614  | 1.955094  |
| H | 2.606269  | 1.592600  | -4.579584 |
| H | 0.739796  | -3.128954 | -4.442037 |
| H | -2.187210 | -4.925499 | -2.321265 |
| H | -4.145562 | -4.026397 | 2.273681  |
| H | 3.447894  | -0.178501 | -6.168280 |
| H | 0.838039  | 7.774267  | 0.639417  |
| H | -3.621688 | -6.650789 | -1.167510 |
| H | -3.985010 | -0.993381 | 4.863831  |
| H | -4.369922 | 0.604161  | 6.778811  |
| H | -2.145311 | 3.734342  | 4.715878  |
| C | 1.822149  | -2.034175 | -0.330097 |
| C | 2.700952  | -2.416179 | -1.337972 |
| C | 3.609178  | -0.131029 | -1.409768 |
| C | 2.728754  | 0.249101  | -0.402766 |
| C | 3.587579  | -1.463168 | -1.937604 |
| H | 1.119795  | -2.759926 | 0.106922  |

|   |          |           |           |
|---|----------|-----------|-----------|
| H | 2.722875 | 1.281663  | -0.022354 |
| H | 2.700531 | -3.451902 | -1.707683 |
| H | 4.311599 | 0.600400  | -1.835355 |
| S | 4.556404 | -1.889666 | -3.292842 |
| C | 1.793339 | -0.686053 | 0.101950  |
| N | 0.747974 | -0.244735 | 0.950463  |
| H | 0.402615 | -0.993596 | 1.571481  |
| H | 1.019362 | 0.569930  | 1.523281  |

**4-ATP - Stage III-b**

E= -4225.0212876

G= -4224.565472

|    |           |           |           |
|----|-----------|-----------|-----------|
| N  | -2.635697 | 1.059975  | -0.822334 |
| C  | -3.705769 | 1.192239  | -0.268426 |
| S  | -5.157044 | 1.390112  | 0.395645  |
| Co | -0.966039 | 0.485376  | -0.051569 |
| C  | -2.337271 | -1.917023 | 1.022271  |
| C  | -2.746736 | -3.273011 | 0.648981  |
| C  | -2.292129 | -3.475087 | -0.674520 |
| C  | -1.587869 | -2.249544 | -1.059871 |
| N  | -1.634166 | -1.335714 | -0.013604 |
| C  | -1.699780 | 2.015112  | 2.383638  |
| C  | -2.396076 | 1.864439  | 3.662497  |
| C  | -2.814401 | 0.515659  | 3.732216  |
| C  | -2.373586 | -0.117898 | 2.486297  |
| N  | -1.687370 | 0.798153  | 1.713706  |
| C  | 0.445094  | 2.880498  | -1.140743 |
| C  | 0.688853  | 4.292813  | -0.841898 |
| C  | 0.062575  | 4.549885  | 0.399732  |
| C  | -0.535319 | 3.283429  | 0.828334  |
| N  | -0.297659 | 2.307230  | -0.109346 |
| C  | -0.263621 | -1.032192 | -2.513017 |

|   |           |           |           |
|---|-----------|-----------|-----------|
| C | 0.670710  | -0.977347 | -3.642958 |
| C | 1.231479  | 0.336203  | -3.630278 |
| C | 0.630405  | 1.024011  | -2.520273 |
| N | -0.212092 | 0.150221  | -1.822327 |
| N | -0.966812 | -2.121827 | -2.217668 |
| N | -2.658536 | -1.378636 | 2.191758  |
| N | -1.185114 | 3.163756  | 1.984692  |
| N | 0.898527  | 2.294429  | -2.230268 |
| C | 0.100382  | 5.821580  | 0.988703  |
| C | 2.286208  | 0.706086  | -4.499376 |
| C | 1.164968  | -1.963387 | -4.485416 |
| C | -2.520542 | -4.682266 | -1.349132 |
| C | -3.451305 | -4.268846 | 1.340129  |
| C | -3.521762 | 0.026171  | 4.838127  |
| C | -2.671259 | 2.769718  | 4.697078  |
| C | 1.373089  | 5.300338  | -1.536873 |
| C | 1.410498  | 6.579390  | -0.949853 |
| H | 1.937008  | 7.396627  | -1.466122 |
| C | 0.784368  | 6.835915  | 0.291836  |
| C | 2.824901  | -0.286234 | -5.310462 |
| C | 2.318139  | -1.629376 | -5.268242 |
| H | 2.697346  | -2.363634 | -5.995945 |
| C | -3.228699 | -5.684361 | -0.658306 |

|   |           |           |           |
|---|-----------|-----------|-----------|
| C | -3.686138 | -5.481254 | 0.664049  |
| H | -4.234948 | -6.287838 | 1.173787  |
| C | -3.380793 | 2.281351  | 5.810876  |
| H | -3.616486 | 2.961524  | 6.643533  |
| C | -3.798137 | 0.932493  | 5.880454  |
| H | 1.860722  | 5.099033  | -2.501989 |
| H | -0.386968 | 6.018712  | 1.954772  |
| H | 2.689120  | 1.728690  | -4.494091 |
| H | 0.757384  | -2.984078 | -4.494985 |
| H | -2.162858 | -4.838922 | -2.377341 |
| H | -3.803725 | -4.109751 | 2.369744  |
| H | 3.674510  | -0.065171 | -5.972456 |
| H | 0.833353  | 7.848740  | 0.720152  |
| H | -3.430925 | -6.644993 | -1.156365 |
| H | -3.848466 | -1.022664 | 4.889401  |
| H | -4.351595 | 0.585403  | 6.766398  |
| H | -2.347355 | 3.819101  | 4.639192  |
| C | 1.541413  | -2.136075 | -0.215520 |
| C | 2.231293  | -2.703467 | -1.278042 |
| C | 3.436075  | -0.585449 | -1.640042 |
| C | 2.711384  | -0.004623 | -0.602391 |
| C | 3.159053  | -1.928579 | -2.049106 |
| H | 0.815750  | -2.725438 | 0.363761  |

|   |          |           |           |
|---|----------|-----------|-----------|
| H | 2.867009 | 1.049142  | -0.326238 |
| H | 2.047235 | -3.750096 | -1.560996 |
| H | 4.189140 | -0.000369 | -2.187246 |
| S | 3.834575 | -2.586395 | -3.489992 |
| C | 1.711270 | -0.756246 | 0.061642  |
| N | 0.792774 | -0.112854 | 0.921140  |
| H | 0.445679 | -0.728067 | 1.673851  |
| H | 1.166171 | 0.757739  | 1.331180  |

**4-ATP - Stage IV**



E= -4716.0881531

G= -4715.633925

|    |           |           |           |
|----|-----------|-----------|-----------|
| N  | -2.597062 | 1.416290  | -0.731188 |
| C  | -3.653551 | 1.726546  | -0.252896 |
| S  | -5.101977 | 2.125968  | 0.351263  |
| Co | -0.997656 | 0.623070  | -0.033321 |
| C  | -2.696170 | -1.635953 | 0.901023  |
| C  | -3.255800 | -2.908122 | 0.448880  |
| C  | -2.716243 | -3.147690 | -0.836890 |
| C  | -1.844641 | -2.013307 | -1.137104 |
| N  | -1.860048 | -1.122869 | -0.077325 |
| C  | -1.529098 | 2.083932  | 2.504806  |
| C  | -2.252908 | 1.954231  | 3.767700  |
| C  | -2.878090 | 0.683403  | 3.741581  |
| C  | -2.521204 | 0.073569  | 2.462917  |
| N  | -1.692950 | 0.930117  | 1.756334  |
| C  | 0.609327  | 2.927981  | -1.030852 |
| C  | 1.019975  | 4.280128  | -0.658245 |
| C  | 0.499263  | 4.513013  | 0.638257  |
| C  | -0.222640 | 3.299649  | 1.016496  |
| N  | -0.133754 | 2.368838  | -0.005073 |
| C  | -0.378838 | -0.882116 | -2.532729 |

|   |           |           |           |
|---|-----------|-----------|-----------|
| C | 0.521311  | -0.844385 | -3.682834 |
| C | 1.140562  | 0.431433  | -3.663255 |
| C | 0.602609  | 1.131467  | -2.498944 |
| N | -0.268519 | 0.298127  | -1.817241 |
| N | -1.142072 | -1.929621 | -2.257463 |
| N | -2.981114 | -1.109949 | 2.083345  |
| N | -0.852687 | 3.176232  | 2.176828  |
| N | 0.964055  | 2.365059  | -2.178191 |
| C | 0.720278  | 5.729402  | 1.304905  |
| C | 2.146598  | 0.768803  | -4.579741 |
| C | 0.888575  | -1.820277 | -4.620206 |
| C | -3.079005 | -4.280749 | -1.581349 |
| C | -4.181571 | -3.790249 | 1.027387  |
| C | -3.674505 | 0.239661  | 4.810050  |
| C | -2.404436 | 2.818491  | 4.864653  |
| C | 1.779291  | 5.255369  | -1.325596 |
| C | 1.999442  | 6.473221  | -0.659639 |
| H | 2.588386  | 7.262129  | -1.152466 |
| C | 1.477390  | 6.706816  | 0.636500  |
| C | 2.534878  | -0.216876 | -5.503096 |
| C | 1.914573  | -1.493508 | -5.523094 |
| H | 2.248886  | -2.240175 | -6.259118 |
| C | -4.003678 | -5.167372 | -1.002254 |

|   |           |           |           |
|---|-----------|-----------|-----------|
| C | -4.548353 | -4.924758 | 0.282398  |
| H | -5.275200 | -5.637422 | 0.701850  |
| C | -3.198707 | 2.373935  | 5.935313  |
| H | -3.340102 | 3.024481  | 6.812199  |
| C | -3.824872 | 1.103142  | 5.908417  |
| H | 2.184422  | 5.071748  | -2.331723 |
| H | 0.316013  | 5.908456  | 2.312226  |
| H | 2.636369  | 1.753002  | -4.552946 |
| H | 0.417367  | -2.813863 | -4.623852 |
| H | -2.663603 | -4.460720 | -2.583850 |
| H | -4.609033 | -3.595554 | 2.021824  |
| H | 3.337201  | 0.000329  | -6.224283 |
| H | 1.670524  | 7.672931  | 1.127953  |
| H | -4.316238 | -6.064783 | -1.558251 |
| H | -4.162316 | -0.745979 | 4.785011  |
| H | -4.441493 | 0.789425  | 6.764871  |
| H | -1.920808 | 3.806330  | 4.882522  |
| C | 1.589892  | -2.004207 | -0.485688 |
| C | 2.458074  | -2.403348 | -1.496540 |
| C | 3.529904  | -0.193069 | -1.448303 |
| C | 2.662766  | 0.205855  | -0.436454 |
| C | 3.428574  | -1.496660 | -2.035929 |
| H | 0.825453  | -2.693102 | -0.095837 |

|   |           |           |           |
|---|-----------|-----------|-----------|
| H | 2.725324  | 1.217875  | -0.009236 |
| H | 2.389928  | -3.417999 | -1.915419 |
| H | 4.291056  | 0.502617  | -1.830791 |
| S | 4.420215  | -1.948276 | -3.367423 |
| C | 1.656116  | -0.681528 | 0.012464  |
| N | 0.638593  | -0.206867 | 0.882359  |
| H | 0.232987  | -0.960392 | 1.459863  |
| H | 0.974077  | 0.547173  | 1.502116  |
| S | -6.085848 | -0.638320 | -0.016780 |
| C | -5.188694 | -0.837529 | -1.388484 |
| N | -4.552155 | -0.976949 | -2.390074 |

**4-ATP - Stage V**

E= -4716.0880669

G= -4715.632595

|    |           |           |           |
|----|-----------|-----------|-----------|
| N  | -2.597095 | 1.418325  | -0.729928 |
| C  | -3.656731 | 1.726106  | -0.257717 |
| S  | -5.109624 | 2.123853  | 0.337813  |
| Co | -0.997296 | 0.625995  | -0.033135 |
| C  | -2.694209 | -1.634500 | 0.901064  |
| C  | -3.252532 | -2.907266 | 0.448941  |
| C  | -2.713212 | -3.146023 | -0.837074 |
| C  | -1.842918 | -2.010658 | -1.137445 |
| N  | -1.859114 | -1.120303 | -0.077633 |
| C  | -1.529202 | 2.085828  | 2.505542  |
| C  | -2.252419 | 1.955151  | 3.768662  |
| C  | -2.876875 | 0.683978  | 3.742227  |
| C  | -2.520059 | 0.074860  | 2.463192  |
| N  | -1.692697 | 0.932169  | 1.756647  |
| C  | 0.608594  | 2.931990  | -1.029988 |
| C  | 1.018604  | 4.284196  | -0.657013 |
| C  | 0.497591  | 4.516550  | 0.639484  |
| C  | -0.223721 | 3.302764  | 1.017384  |
| N  | -0.134403 | 2.372317  | -0.004430 |
| C  | -0.377620 | -0.878375 | -2.532584 |

|   |           |           |           |
|---|-----------|-----------|-----------|
| C | 0.523200  | -0.840081 | -3.682354 |
| C | 1.141487  | 0.436212  | -3.662528 |
| C | 0.602869  | 1.135720  | -2.498487 |
| N | -0.268267 | 0.301738  | -1.817105 |
| N | -1.140446 | -1.926307 | -2.257796 |
| N | -2.979154 | -1.109015 | 2.083558  |
| N | -0.853558 | 3.178611  | 2.177789  |
| N | 0.963814  | 2.369329  | -2.177322 |
| C | 0.718078  | 5.732844  | 1.306509  |
| C | 2.147807  | 0.774443  | -4.578646 |
| C | 0.891745  | -1.815591 | -4.619407 |
| C | -3.074850 | -4.279444 | -1.581521 |
| C | -4.176927 | -3.790690 | 1.027750  |
| C | -3.672532 | 0.239251  | 4.810852  |
| C | -2.403996 | 2.818823  | 4.866084  |
| C | 1.777638  | 5.259943  | -1.323983 |
| C | 1.997228  | 6.477678  | -0.657658 |
| H | 2.585961  | 7.266942  | -1.150168 |
| C | 1.474906  | 6.710718  | 0.638489  |
| C | 2.537270  | -0.210747 | -5.501715 |
| C | 1.918287  | -1.488051 | -5.521634 |
| H | 2.253457  | -2.234508 | -6.257474 |
| C | -3.998162 | -5.167289 | -1.002157 |

|   |           |           |           |
|---|-----------|-----------|-----------|
| C | -4.542583 | -4.925546 | 0.282782  |
| H | -5.268336 | -5.639195 | 0.702452  |
| C | -3.197525 | 2.373300  | 5.936884  |
| H | -3.338922 | 3.023349  | 6.814139  |
| C | -3.822929 | 1.102135  | 5.909683  |
| H | 2.183013  | 5.076757  | -2.330093 |
| H | 0.313624  | 5.911448  | 2.313834  |
| H | 2.636531  | 1.759163  | -4.551633 |
| H | 0.421592  | -2.809671 | -4.623239 |
| H | -2.659642 | -4.458747 | -2.584220 |
| H | -4.604173 | -3.596689 | 2.022416  |
| H | 3.339956  | 0.006875  | -6.222375 |
| H | 1.667620  | 7.676767  | 1.130238  |
| H | -4.309844 | -6.065012 | -1.558147 |
| H | -4.159740 | -0.746682 | 4.785584  |
| H | -4.438978 | 0.787647  | 6.766267  |
| H | -1.920941 | 3.806939  | 4.884202  |
| C | 1.582451  | -2.010342 | -0.479019 |
| C | 2.447085  | -2.417654 | -1.489786 |
| C | 3.524899  | -0.210257 | -1.457389 |
| C | 2.660905  | 0.197038  | -0.445990 |
| C | 3.418742  | -1.516950 | -2.036779 |
| H | 0.817452  | -2.695143 | -0.083140 |

|   |           |           |           |
|---|-----------|-----------|-----------|
| H | 2.726885  | 1.211563  | -0.025265 |
| H | 2.375091  | -3.434547 | -1.902551 |
| H | 4.286927  | 0.481185  | -1.845777 |
| S | 4.406069  | -1.979919 | -3.367971 |
| C | 1.653256  | -0.684952 | 0.010810  |
| N | 0.639018  | -0.202500 | 0.881019  |
| H | 0.234149  | -0.951716 | 1.464627  |
| H | 0.978614  | 0.554186  | 1.495369  |
| S | -6.080493 | -0.642488 | -0.019733 |
| C | -5.186280 | -0.841443 | -1.393556 |
| N | -4.551794 | -0.980686 | -2.396397 |



## NH<sub>2</sub> - Stage I

E= -3761.570285

G= -3761.164004

N -1.535294 0.738794 -0.570697

C -1.781089 1.920766 -0.696749

S -2.210747 3.458954 -0.892818

Co 0.066654 -0.071161 0.023395

C -0.233485 1.231216 2.696366

C -0.791097 1.001351 4.012640

C -1.344106 -0.304356 3.997737

C -1.094093 -0.835953 2.655714

N -0.399694 0.090118 1.900100

C 1.490544 2.335825 -0.999756

C 1.796313 3.699936 -0.632531

C 1.381630 3.863640 0.714630

C 0.833742 2.571367 1.129089

N 0.940109 1.655137 0.097529

C 0.554496 -1.471830 -2.573746

C 1.121217 -1.247021 -3.887548

C 1.634479 0.074817 -3.889326

C 1.371859 0.612709 -2.552670

|   |           |           |           |
|---|-----------|-----------|-----------|
| N | 0.748861  | -0.340833 | -1.769475 |
| C | -1.255309 | -2.543490 | 1.088217  |
| C | -1.652052 | -3.878370 | 0.690343  |
| C | -1.234717 | -4.042597 | -0.655097 |
| C | -0.585335 | -2.784811 | -1.033516 |
| N | -0.598724 | -1.903388 | 0.029719  |
| N | -1.493362 | -2.050077 | 2.294957  |
| N | 0.322758  | 2.379179  | 2.338955  |
| N | 1.706891  | 1.851544  | -2.213786 |
| N | -0.059601 | -2.597469 | -2.238648 |
| C | 2.251306  | 0.633265  | -5.010196 |
| C | -1.440454 | -5.230471 | -1.358937 |
| C | -2.303249 | -4.933757 | 1.361975  |
| C | -1.966165 | -0.862535 | 5.115996  |
| C | -0.865236 | 1.786790  | 5.181562  |
| C | 1.521002  | 5.074263  | 1.394719  |
| C | 2.367373  | 4.783082  | -1.333799 |
| C | 1.222624  | -2.045563 | -5.045516 |
| C | 1.833301  | -1.503439 | -6.176581 |
| H | 1.922586  | -2.103790 | -7.095815 |
| C | 2.356977  | -0.165658 | -6.185740 |
| C | -2.097872 | -6.302653 | -0.688188 |
| C | -2.522409 | -6.126681 | 0.672923  |

|   |           |           |           |
|---|-----------|-----------|-----------|
| H | -3.030873 | -6.966812 | 1.171913  |
| C | -2.041805 | -0.078073 | 6.303442  |
| C | -1.486209 | 1.246846  | 6.308014  |
| H | -1.560218 | 1.839356  | 7.233678  |
| C | 2.508299  | 6.002020  | -0.672795 |
| H | 2.943867  | 6.867484  | -1.196754 |
| C | 2.093893  | 6.174460  | 0.693259  |
| H | 0.827761  | -3.072670 | -5.063482 |
| H | 2.643131  | 1.661626  | -5.000126 |
| H | -1.108688 | -5.348146 | -2.401671 |
| H | -2.633975 | -4.824098 | 2.405958  |
| H | -2.390962 | -1.877509 | 5.092646  |
| H | -0.446129 | 2.804037  | 5.209734  |
| H | 1.191312  | 5.191238  | 2.438113  |
| H | 2.689476  | 4.674873  | -2.380499 |
| N | -2.611836 | -0.583582 | 7.437120  |
| H | -2.810278 | 0.038320  | 8.222585  |
| H | -3.139568 | -1.456774 | 7.388519  |
| N | -2.302340 | -7.496657 | -1.317490 |
| H | -2.906368 | -8.198893 | -0.887717 |
| H | -2.131120 | -7.575658 | -2.321163 |
| N | 2.970769  | 0.319854  | -7.305198 |
| H | 3.199057  | 1.313778  | -7.362554 |

|   |          |           |           |
|---|----------|-----------|-----------|
| H | 2.889719 | -0.191134 | -8.185844 |
| N | 2.269567 | 7.378793  | 1.309070  |
| H | 1.854213 | 7.544662  | 2.227102  |
| H | 2.538676 | 8.195811  | 0.758704  |

**NH<sub>2</sub> - Stage II**

E= -3761.403312

G= -3760.995143

N -1.524220 0.733004 -0.564656

C -1.739587 1.913826 -0.755628

S -2.139174 3.443545 -1.037387

Co 0.071703 -0.072394 0.027401

C -0.238024 1.227194 2.700142

C -0.784449 0.998869 4.014948

C -1.329786 -0.309679 4.003253

C -1.088530 -0.841832 2.653219

N -0.402060 0.090089 1.898909

C 1.487358 2.338512 -0.993025

C 1.774552 3.704206 -0.635703

C 1.361750 3.866908 0.711475

C 0.827134 2.565854 1.134440

N 0.945140 1.649648 0.102744

C 0.536438 -1.459207 -2.578956

C 1.106012 -1.240844 -3.886412

C 1.641858 0.071481 -3.880550

C 1.377257 0.614367 -2.540010

N 0.739890 -0.335676 -1.765769

C -1.271788 -2.538069 1.080723

C -1.680835 -3.863173 0.683311  
C -1.265452 -4.026919 -0.662435  
C -0.604623 -2.768318 -1.041274  
N -0.612987 -1.894001 0.026114  
N -1.496919 -2.048640 2.296005  
N 0.316144 2.380187 2.339612  
N 1.714303 1.849474 -2.207286  
N -0.085890 -2.585020 -2.245143  
C 2.270095 0.625383 -4.988825  
C -1.477870 -5.203662 -1.369379  
C -2.337470 -4.915546 1.357138  
C -1.941470 -0.871683 5.116701  
C -0.853381 1.786857 5.184022  
C 1.480678 5.075210 1.386464  
C 2.329363 4.791437 -1.345529  
C 1.200546 -2.040855 -5.045479  
C 1.824873 -1.508241 -6.171288  
H 1.912148 -2.106657 -7.091355  
C 2.366911 -0.177932 -6.172291  
C -2.146877 -6.276946 -0.694101  
C -2.566177 -6.104917 0.668823  
H -3.076688 -6.944089 1.166055  
C -2.013934 -0.079927 6.309824

|   |           |           |           |
|---|-----------|-----------|-----------|
| C | -1.463442 | 1.246879  | 6.314017  |
| H | -1.534031 | 1.837032  | 7.240819  |
| C | 2.452888  | 6.015149  | -0.693133 |
| H | 2.874680  | 6.884764  | -1.220388 |
| C | 2.036319  | 6.186086  | 0.671981  |
| H | 0.790987  | -3.061741 | -5.065019 |
| H | 2.680396  | 1.646104  | -4.975388 |
| H | -1.148078 | -5.324652 | -2.412033 |
| H | -2.661978 | -4.804360 | 2.402505  |
| H | -2.361615 | -1.888329 | 5.098853  |
| H | -0.436752 | 2.804812  | 5.207214  |
| H | 1.154467  | 5.193682  | 2.430473  |
| H | 2.652186  | 4.680282  | -2.391290 |
| N | -2.598702 | -0.582805 | 7.423645  |
| H | -2.664921 | -0.024386 | 8.276799  |
| H | -2.997111 | -1.523626 | 7.424614  |
| N | -2.379009 | -7.444555 | -1.340287 |
| H | -2.853984 | -8.217360 | -0.869947 |
| H | -2.082211 | -7.572363 | -2.309531 |
| N | 2.963801  | 0.318139  | -7.282790 |
| H | 3.352769  | 1.262866  | -7.288604 |
| H | 3.036215  | -0.244225 | -8.132804 |
| N | 2.163972  | 7.389897  | 1.278659  |

H 1.869144 7.519594 2.248307

H 2.548046 8.191294 0.774484

**NH<sub>2</sub> - Stage III-a**



E= -3761.2150899

G= -3760.805434

N -1.709173 0.813002 -0.648034

C -1.905264 2.008374 -0.644702

S -2.169606 3.600602 -0.633421

Co 0.008355 -0.055920 -0.002617

C -0.237250 1.219438 2.686394

C -0.732582 0.971378 4.011220

C -1.280452 -0.339479 4.001411

C -1.088788 -0.854654 2.633131

N -0.432364 0.092241 1.870484

C 1.439553 2.365943 -1.011190

C 1.705684 3.733329 -0.670102

C 1.289676 3.897398 0.677892

C 0.767212 2.582869 1.107939

N 0.882358 1.680839 0.078557

C 0.565529 -1.469135 -2.571574

C 1.179918 -1.270052 -3.854576

C 1.716094 0.045693 -3.848779

C 1.399898 0.611925 -2.525304

N 0.733728 -0.332056 -1.764566

C -1.324896 -2.529237 1.048036

C -1.746478 -3.842935 0.651192  
C -1.322155 -4.009404 -0.692842  
C -0.639335 -2.751921 -1.066422  
N -0.672142 -1.877707 -0.008552  
N -1.519877 -2.048970 2.276675  
N 0.290730 2.385799 2.324696  
N 1.707551 1.855023 -2.213289  
N -0.081631 -2.587953 -2.253499  
C 2.366915 0.587394 -4.940713  
C -1.540209 -5.175449 -1.400599  
C -2.419272 -4.888180 1.324885  
C -1.857146 -0.911281 5.119295  
C -0.765117 1.755677 5.187302  
C 1.399589 5.099720 1.347079  
C 2.252339 4.821461 -1.389297  
C 1.297043 -2.088984 -5.001517  
C 1.950036 -1.573551 -6.114177  
H 2.063622 -2.179966 -7.025568  
C 2.493189 -0.240098 -6.113100  
C -2.233357 -6.244563 -0.723166  
C -2.659651 -6.072792 0.637246  
H -3.182716 -6.907135 1.128297  
C -1.886076 -0.123685 6.325422

|   |           |           |           |
|---|-----------|-----------|-----------|
| C | -1.335752 | 1.206629  | 6.328724  |
| H | -1.377535 | 1.784155  | 7.264614  |
| C | 2.364828  | 6.049051  | -0.747007 |
| H | 2.778128  | 6.920917  | -1.276101 |
| C | 1.948113  | 6.217476  | 0.617721  |
| H | 0.882792  | -3.107440 | -5.014988 |
| H | 2.774057  | 1.609108  | -4.935646 |
| H | -1.205231 | -5.305104 | -2.440445 |
| H | -2.746165 | -4.770294 | 2.368388  |
| H | -2.282896 | -1.925390 | 5.108617  |
| H | -0.348853 | 2.773326  | 5.200964  |
| H | 1.077811  | 5.224540  | 2.391650  |
| H | 2.576477  | 4.703335  | -2.433563 |
| N | -2.430106 | -0.636631 | 7.443804  |
| H | -2.461716 | -0.090755 | 8.309669  |
| H | -2.826656 | -1.580546 | 7.447913  |
| N | -2.470685 | -7.397052 | -1.377880 |
| H | -2.959269 | -8.170338 | -0.918383 |
| H | -2.167486 | -7.520089 | -2.347578 |
| N | 3.116709  | 0.239933  | -7.204199 |
| H | 3.505622  | 1.186990  | -7.211535 |
| H | 3.215020  | -0.333694 | -8.046664 |
| N | 2.060287  | 7.412849  | 1.226064  |

H 1.767986 7.534629 2.199419

H 2.441035 8.221393 0.726893

**NH<sub>2</sub> - Stage III-b**

E= -3761.2223459

G= -3760.810857

N -1.495875 0.711305 -0.550857

C -1.681211 1.876636 -0.850569

S -2.057868 3.375083 -1.273844

Co 0.092422 -0.077906 0.038987

C -0.234877 1.217986 2.710543

C -0.763921 0.989221 4.025200

C -1.294646 -0.325904 4.018844

C -1.066645 -0.856839 2.658581

N -0.394592 0.085765 1.904520

C 1.500247 2.338054 -0.975214

C 1.765100 3.705389 -0.629461

C 1.345773 3.869370 0.715496

C 0.824912 2.559498 1.147562

N 0.960571 1.642159 0.116378

C 0.536786 -1.448066 -2.577078

C 1.112779 -1.237812 -3.876028

C 1.676362 0.063132 -3.859946

C 1.406127 0.612658 -2.516333

N 0.748551 -0.333017 -1.754370

C -1.272225 -2.538537 1.077806

C -1.699413 -3.850474 0.678659  
C -1.286525 -4.012897 -0.668465  
C -0.609726 -2.754678 -1.045834  
N -0.609858 -1.890599 0.029065  
N -1.481261 -2.055664 2.304382  
N 0.311442 2.379759 2.345395  
N 1.746821 1.841845 -2.188026  
N -0.097714 -2.573757 -2.246759  
C 2.317053 0.610656 -4.955701  
C -1.513859 -5.175797 -1.380482  
C -2.371009 -4.896063 1.352072  
C -1.890630 -0.892282 5.130067  
C -0.830183 1.782204 5.193224  
C 1.434555 5.078740 1.380647  
C 2.302511 4.796613 -1.349482  
C 1.195036 -2.037837 -5.038282  
C 1.834821 -1.515656 -6.157802  
H 1.915269 -2.109784 -7.080734  
C 2.402496 -0.196535 -6.147268  
C -2.201053 -6.246828 -0.702479  
C -2.617332 -6.078124 0.661265  
H -3.138198 -6.913179 1.153578  
C -1.958705 -0.092541 6.328219

|   |           |           |           |
|---|-----------|-----------|-----------|
| C | -1.422910 | 1.239797  | 6.328667  |
| H | -1.492804 | 1.828851  | 7.255684  |
| C | 2.398944  | 6.027250  | -0.709343 |
| H | 2.804178  | 6.901362  | -1.241184 |
| C | 1.971891  | 6.199150  | 0.651874  |
| H | 0.762755  | -3.048834 | -5.061506 |
| H | 2.747926  | 1.622673  | -4.939079 |
| H | -1.187985 | -5.300033 | -2.423869 |
| H | -2.691744 | -4.781787 | 2.397887  |
| H | -2.303064 | -1.912037 | 5.120079  |
| H | -0.424662 | 2.804390  | 5.207431  |
| H | 1.104117  | 5.201786  | 2.422683  |
| H | 2.630012  | 4.680341  | -2.392857 |
| N | -2.526982 | -0.606090 | 7.436961  |
| H | -2.589120 | -0.054875 | 8.297063  |
| H | -2.912380 | -1.553958 | 7.436662  |
| N | -2.442860 | -7.398607 | -1.358574 |
| H | -2.926470 | -8.173447 | -0.896960 |
| H | -2.146488 | -7.519158 | -2.330462 |
| N | 3.014227  | 0.298551  | -7.241325 |
| H | 3.419219  | 1.238160  | -7.234705 |
| H | 3.085080  | -0.256587 | -8.098161 |
| N | 2.065038  | 7.401169  | 1.253413  |

H 1.764086 7.525812 2.223310

H 2.437687 8.210823 0.750832

**NH<sub>2</sub> - Stage IV**



E= -4252.2857648

G= -4251.873891

-1.709604 0.813208 -0.850434

-1.983368 1.984474 -0.795318

-2.325224 3.566537 -0.692641

-0.034575 -0.078353 -0.127604

-0.462421 1.254621 2.517149

-1.100939 1.059127 3.790646

-1.664879 -0.240831 3.761802

-1.330388 -0.803545 2.436496

-0.597862 0.108267 1.716350

1.460291 2.318848 -1.091492

1.779956 3.673915 -0.722310

1.315105 3.847204 0.605941

0.713100 2.556644 1.001003

0.837471 1.650640 -0.027871

0.580589 -1.496765 -2.688916

1.190197 -1.287717 -3.977323

1.715630 0.029253 -3.962996

1.401817 0.581424 -2.629470

0.737560 -0.361640 -1.880117

-1.391998 -2.541015 0.902172

-1.740177 -3.885376 0.521872  
-1.257772 -4.065839 -0.799117  
-0.613968 -2.790287 -1.178357  
-0.710464 -1.893859 -0.142488  
-1.689334 -2.030619 2.093438  
0.153820 2.387058 2.186312  
1.731608 1.818574 -2.295282  
-0.041426 -2.626842 -2.361173  
2.368163 0.581445 -5.052035  
-1.405795 -5.256880 -1.487556  
-2.402088 -4.938861 1.189872  
-2.384993 -0.762154 4.820869  
-1.276052 1.889028 4.918642  
1.444923 5.043152 1.289598  
2.401096 4.742630 -1.404551  
1.321028 -2.094416 -5.128725  
1.971483 -1.565119 -6.240705  
2.088611 -2.166553 -7.155215  
2.502713 -0.231672 -6.231848  
-2.081564 -6.336216 -0.815324  
-2.568500 -6.149158 0.521537  
-3.080376 -6.990843 1.012285  
-2.562190 0.073348 5.979620

|           |           |           |
|-----------|-----------|-----------|
| -2.000552 | 1.394982  | 5.999531  |
| -2.159600 | 2.015200  | 6.894875  |
| 2.542440  | 5.960411  | -0.743539 |
| 3.018167  | 6.815401  | -1.247580 |
| 2.075210  | 6.138974  | 0.601563  |
| 0.917994  | -3.117688 | -5.152170 |
| 2.770013  | 1.605451  | -5.035734 |
| -1.027797 | -5.393118 | -2.511780 |
| -2.778450 | -4.810572 | 2.215553  |
| -2.824810 | -1.769990 | 4.791171  |
| -0.856845 | 2.905432  | 4.943526  |
| 1.077215  | 5.172240  | 2.318450  |
| 2.763069  | 4.621830  | -2.436298 |
| -3.261174 | -0.390483 | 7.037631  |
| -3.406918 | 0.192763  | 7.865038  |
| -3.669193 | -1.328136 | 7.024712  |
| -2.250306 | -7.515457 | -1.450811 |
| -2.726850 | -8.295016 | -0.991226 |
| -1.904212 | -7.649684 | -2.403566 |
| 3.125133  | 0.267990  | -7.321914 |
| 3.504251  | 1.217557  | -7.318649 |
| 3.225436  | -0.293796 | -8.170471 |
| 2.217514  | 7.327305  | 1.227639  |

|           |          |          |
|-----------|----------|----------|
| 1.884106  | 7.456295 | 2.185539 |
| 2.653106  | 8.121073 | 0.752261 |
| -3.519143 | 3.327314 | 2.066349 |
| -3.773131 | 1.710168 | 1.872301 |
| -3.976904 | 0.539907 | 1.729241 |

**NH<sub>2</sub> - Stage V**

E= -4252.2764835

G= -4251.867425

N -1.661220 0.646190 -0.504270

C -2.332940 1.344840 0.235970

S -3.273300 2.264440 1.153580

Co 0.068320 -0.033190 -0.001060

C -0.270230 1.288140 2.646970

C -0.895050 1.098400 3.926790

C -1.398690 -0.227350 3.934560

C -1.049820 -0.807090 2.623510

N -0.348720 0.115830 1.876940

C 1.454500 2.394040 -1.045740

C 1.859480 3.718220 -0.657710

C 1.471610 3.875750 0.696790

C 0.828750 2.605680 1.090050

N 0.859460 1.721150 0.033160

C 0.467870 -1.387980 -2.641050

C 0.952280 -1.146240 -3.974910

C 1.459140 0.177270 -3.982730

C 1.260850 0.699810 -2.615210

N 0.670510 -0.263720 -1.828810

C -1.138670 -2.544130 1.091810

C -1.481950 -3.892180 0.722000  
C -1.097810 -4.044420 -0.633880  
C -0.516130 -2.750110 -1.043900  
N -0.528880 -1.876680 0.020270  
N -1.402120 -2.037100 2.293900  
N 0.307110 2.434680 2.289900  
N 1.633340 1.921410 -2.278150  
N -0.077350 -2.546100 -2.273610  
C 2.017950 0.753520 -5.109950  
C -1.279400 -5.227040 -1.330000  
C -2.076360 -4.966330 1.419970  
C -2.074900 -0.758710 5.018820  
C -1.072680 1.937740 5.049140  
C 1.697010 5.043200 1.403610  
C 2.504600 4.771870 -1.343050  
C 1.003570 -1.936320 -5.144170  
C 1.555520 -1.382260 -6.296240  
H 1.607600 -1.969680 -7.225570  
C 2.068380 -0.041900 -6.309630  
C -1.885180 -6.327630 -0.627020  
C -2.272250 -6.168830 0.745850  
H -2.734140 -7.025920 1.259140  
C -2.263940 0.090000 6.166170

|   |           |           |           |
|---|-----------|-----------|-----------|
| C | -1.752660 | 1.432470  | 6.152710  |
| H | -1.914220 | 2.059900  | 7.042520  |
| C | 2.747030  | 5.958780  | -0.657700 |
| H | 3.246160  | 6.800720  | -1.160970 |
| C | 2.354890  | 6.122890  | 0.713530  |
| H | 0.616220  | -2.965780 | -5.149550 |
| H | 2.411500  | 1.780840  | -5.109250 |
| H | -0.981260 | -5.338830 | -2.383100 |
| H | -2.379240 | -4.859810 | 2.472070  |
| H | -2.463750 | -1.787710 | 5.019680  |
| H | -0.687940 | 2.968090  | 5.051970  |
| H | 1.389620  | 5.162530  | 2.453170  |
| H | 2.808050  | 4.661210  | -2.394520 |
| N | -2.921640 | -0.382450 | 7.245670  |
| H | -3.073940 | 0.208970  | 8.066200  |
| H | -3.291870 | -1.335790 | 7.256860  |
| N | -2.085530 | -7.498980 | -1.267930 |
| H | -2.520120 | -8.290920 | -0.788340 |
| H | -1.815010 | -7.611390 | -2.247700 |
| N | 2.597180  | 0.482460  | -7.435760 |
| H | 2.964950  | 1.436680  | -7.445410 |
| H | 2.639210  | -0.065160 | -8.298720 |
| N | 2.594170  | 7.280360  | 1.364040  |

|   |           |          |           |
|---|-----------|----------|-----------|
| H | 2.315220  | 7.398120 | 2.341020  |
| H | 3.055210  | 8.061660 | 0.891290  |
| S | -5.849190 | 2.453230 | -0.527400 |
| C | -5.111620 | 1.364060 | -1.524310 |
| N | -4.570570 | 0.573770 | -2.243970 |

**MeO - Stage I**



E= -3998.0214922

G= -3997.557279

N -1.424722 0.719990 -0.525876

C -1.642696 1.904453 -0.693117

S -2.061587 3.431933 -0.949921

Co 0.146707 -0.105066 0.061057

C -0.119662 1.238995 2.710548

C -0.680521 1.040456 4.037208

C -1.261338 -0.252330 4.038920

C -1.030973 -0.806754 2.705252

N -0.318061 0.097783 1.934594

C 1.615049 2.251924 -0.998976

C 1.958158 3.618568 -0.648588

C 1.554730 3.804541 0.697813

C 0.977177 2.534720 1.130892

N 1.051530 1.604545 0.103355

C 0.557262 -1.533402 -2.526607

C 1.122023 -1.338126 -3.852686

C 1.680918 -0.035898 -3.865453

C 1.444794 0.522623 -2.535103

N 0.792892 -0.405943 -1.739890

C -1.247329 -2.518370 1.153265

C -1.689516 -3.850256 0.770087  
C -1.284081 -4.036932 -0.575171  
C -0.601136 -2.805196 -0.970129  
N -0.581838 -1.913787 0.088698  
N -1.462559 -2.010947 2.357337  
N 0.465998 2.367462 2.341687  
N 1.817511 1.751336 -2.207418  
N -0.082033 -2.639566 -2.178790  
C 2.309474 0.486572 -4.998593  
C -1.535299 -5.226801 -1.263035  
C -2.367123 -4.869689 1.458641  
C -1.895704 -0.774320 5.169137  
C -0.729898 1.846419 5.186348  
C 1.719821 5.026356 1.355362  
C 2.542789 4.672698 -1.370703  
C 1.183729 -2.151712 -4.995870  
C 1.808361 -1.644020 -6.144529  
H 1.861675 -2.269661 -7.045644  
C 2.368999 -0.334208 -6.149920  
C -2.218961 -6.252398 -0.567519  
C -2.631942 -6.070499 0.783755  
H -3.161770 -6.875395 1.310574  
C -1.944649 0.039481 6.325839

|   |           |           |           |
|---|-----------|-----------|-----------|
| C | -1.365118 | 1.341061  | 6.330172  |
| H | -1.412271 | 1.962112  | 7.234782  |
| C | 2.710396  | 5.907963  | -0.730072 |
| H | 3.159633  | 6.742373  | -1.284932 |
| C | 2.301720  | 6.088284  | 0.623871  |
| H | 0.753739  | -3.164330 | -4.999053 |
| H | 2.746296  | 1.495286  | -5.019845 |
| H | -1.221611 | -5.384795 | -2.304911 |
| H | -2.684851 | -4.738181 | 2.503712  |
| H | -2.348489 | -1.776102 | 5.182842  |
| H | -0.283808 | 2.852009  | 5.197142  |
| H | 1.406207  | 5.183663  | 2.397246  |
| H | 2.857843  | 4.541287  | -2.416477 |
| O | 2.431626  | 7.266013  | 1.295794  |
| O | 2.987309  | 0.214481  | -7.233409 |
| O | -2.442319 | -7.395927 | -1.274707 |
| O | -2.573712 | -0.506785 | 7.404445  |
| C | 2.988122  | 8.392953  | 0.610027  |
| H | 2.375752  | 8.671219  | -0.274239 |
| H | 2.979773  | 9.225762  | 1.337121  |
| H | 4.033396  | 8.196218  | 0.289147  |
| C | 3.083209  | -0.557178 | -8.435240 |
| H | 2.078162  | -0.811372 | -8.834828 |

|   |           |           |           |
|---|-----------|-----------|-----------|
| H | 3.615408  | 0.080754  | -9.164726 |
| H | 3.663070  | -1.490783 | -8.272001 |
| C | -3.120376 | -8.480947 | -0.632920 |
| H | -3.182230 | -9.288711 | -1.385306 |
| H | -2.554872 | -8.845582 | 0.251281  |
| H | -4.146500 | -8.190396 | -0.321340 |
| C | -2.664901 | 0.260647  | 8.609284  |
| H | -3.231797 | 1.202477  | 8.447672  |
| H | -3.208635 | -0.373475 | 9.333576  |
| H | -1.658455 | 0.499974  | 9.014480  |

**MeO - Stage II**

E= -3997.8400364

G= -3997.375693

N -1.407528 0.698968 -0.514977

C -1.592319 1.878418 -0.754011

S -1.970805 3.395841 -1.101123

Co 0.169751 -0.113483 0.075253

C -0.106541 1.225404 2.723764

C -0.652382 1.022422 4.052881

C -1.223782 -0.272505 4.056300

C -1.003385 -0.822944 2.713296

N -0.302254 0.089070 1.941790

C 1.623303 2.250966 -0.980848

C 1.943557 3.622665 -0.639254

C 1.538717 3.807495 0.704924

C 0.978865 2.526308 1.145038

N 1.068439 1.594270 0.119794

C 0.571250 -1.528183 -2.516859

C 1.140048 -1.336175 -3.838523

C 1.711542 -0.041481 -3.844906

C 1.468752 0.520266 -2.511333

N 0.808198 -0.406353 -1.722506

C -1.231094 -2.524300 1.156822

C -1.679718 -3.850595 0.772586  
C -1.274405 -4.035671 -0.570955  
C -0.585496 -2.800486 -0.964713  
N -0.564457 -1.914078 0.096875  
N -1.438947 -2.022714 2.367881  
N 0.469976 2.361691 2.353279  
N 1.837684 1.748228 -2.189236  
N -0.071482 -2.636500 -2.172433  
C 2.346518 0.480930 -4.966909  
C -1.526314 -5.215994 -1.262631  
C -2.360414 -4.867009 1.461184  
C -1.845383 -0.802450 5.182335  
C -0.695801 1.827398 5.202080  
C 1.679207 5.028380 1.357471  
C 2.509650 4.680453 -1.369113  
C 1.197361 -2.149195 -4.981520  
C 1.831928 -1.645336 -6.127426  
H 1.882834 -2.269127 -7.029684  
C 2.403265 -0.342742 -6.126615  
C -2.217753 -6.246463 -0.564744  
C -2.629844 -6.066802 0.784583  
H -3.162193 -6.870568 1.310083  
C -1.889591 0.013690 6.347985

|   |           |           |           |
|---|-----------|-----------|-----------|
| C | -1.318207 | 1.316208  | 6.351372  |
| H | -1.361479 | 1.934968  | 7.257482  |
| C | 2.656117  | 5.922952  | -0.735618 |
| H | 3.089924  | 6.761718  | -1.295683 |
| C | 2.245161  | 6.102525  | 0.615281  |
| H | 0.756665  | -3.156837 | -4.987743 |
| H | 2.791941  | 1.485670  | -4.985233 |
| H | -1.213435 | -5.374220 | -2.304479 |
| H | -2.677144 | -4.735054 | 2.506169  |
| H | -2.293654 | -1.805969 | 5.198182  |
| H | -0.256249 | 2.835546  | 5.209573  |
| H | 1.364628  | 5.186471  | 2.398710  |
| H | 2.825932  | 4.547542  | -2.413980 |
| O | 2.350152  | 7.273966  | 1.283178  |
| O | 3.027543  | 0.207013  | -7.194001 |
| O | -2.438431 | -7.376087 | -1.276666 |
| O | -2.505087 | -0.542019 | 7.417450  |
| C | 2.891209  | 8.416789  | 0.604485  |
| H | 2.275646  | 8.682630  | -0.280424 |
| H | 2.863544  | 9.243650  | 1.336925  |
| H | 3.939932  | 8.233567  | 0.289493  |
| C | -2.600655 | 0.211265  | 8.634677  |
| H | -3.174944 | 1.148740  | 8.479122  |

|   |           |           |           |
|---|-----------|-----------|-----------|
| H | -3.137454 | -0.437675 | 9.349989  |
| H | -1.593354 | 0.451891  | 9.034844  |
| C | -3.121818 | -8.471439 | -0.651123 |
| H | -4.147553 | -8.178375 | -0.343394 |
| H | -3.178005 | -9.267930 | -1.414982 |
| H | -2.557994 | -8.841419 | 0.230974  |
| C | 3.128083  | -0.550921 | -8.407921 |
| H | 2.122397  | -0.791946 | -8.811886 |
| H | 3.668967  | 0.094774  | -9.123095 |
| H | 3.700648  | -1.488396 | -8.246201 |

**MeO - Stage III-a**



E= -3997.6316317

G= -3997.169695

N -1.597871 0.791011 -0.604820

C -1.823951 1.982565 -0.610582

S -2.128354 3.562259 -0.613082

Co 0.080236 -0.083819 0.034780

C -0.111095 1.226638 2.712243

C -0.608052 1.004291 4.048595

C -1.192343 -0.287500 4.050901

C -1.018247 -0.821979 2.689849

N -0.339941 0.097092 1.915757

C 1.566044 2.280036 -1.007647

C 1.871686 3.652407 -0.678873

C 1.461232 3.842275 0.663074

C 0.909262 2.549787 1.110973

N 0.989627 1.631348 0.088733

C 0.603326 -1.546932 -2.514401

C 1.214666 -1.374239 -3.810714

C 1.778073 -0.073383 -3.819860

C 1.484855 0.512462 -2.502086

N 0.806433 -0.407102 -1.726367

C -1.297050 -2.504946 1.122582

C -1.749181 -3.824041 0.740898  
C -1.331681 -4.015653 -0.597778  
C -0.626217 -2.781020 -0.990014  
N -0.639077 -1.887357 0.055564  
N -1.479026 -2.010921 2.343551  
N 0.439293 2.374639 2.334675  
N 1.819412 1.754373 -2.202109  
N -0.066949 -2.643923 -2.180979  
C 2.429844 0.440278 -4.927910  
C -1.579228 -5.191032 -1.285930  
C -2.440876 -4.834572 1.430643  
C -1.785704 -0.825577 5.179884  
C -0.612464 1.800670 5.208256  
C 1.599980 5.057187 1.310890  
C 2.439602 4.707334 -1.414527  
C 1.299183 -2.204558 -4.943264  
C 1.956192 -1.714267 -6.078626  
H 2.033896 -2.348118 -6.971685  
C 2.518312 -0.405568 -6.080268  
C -2.291208 -6.219873 -0.585156  
C -2.714216 -6.034962 0.758348  
H -3.256093 -6.833366 1.281788  
C -1.784096 -0.017973 6.363220

|   |           |           |           |
|---|-----------|-----------|-----------|
| C | -1.200935 | 1.281405  | 6.367712  |
| H | -1.211414 | 1.886108  | 7.284038  |
| C | 2.582709  | 5.954308  | -0.790110 |
| H | 3.017195  | 6.790572  | -1.352874 |
| C | 2.170095  | 6.136252  | 0.557556  |
| H | 0.861448  | -3.213159 | -4.943538 |
| H | 2.865000  | 1.449111  | -4.954873 |
| H | -1.257179 | -5.359437 | -2.323326 |
| H | -2.763189 | -4.694559 | 2.472653  |
| H | -2.246868 | -1.822983 | 5.198935  |
| H | -0.165489 | 2.805214  | 5.210522  |
| H | 1.287338  | 5.222852  | 2.351514  |
| H | 2.761134  | 4.565892  | -2.456529 |
| O | 2.268024  | 7.296533  | 1.225334  |
| O | 3.155820  | 0.135206  | -7.128320 |
| O | -2.508410 | -7.336617 | -1.298908 |
| O | -2.367328 | -0.582009 | 7.430336  |
| C | 2.810820  | 8.451090  | 0.560796  |
| H | 2.197778  | 8.716221  | -0.325168 |
| H | 2.773787  | 9.268249  | 1.302631  |
| H | 3.860802  | 8.267022  | 0.252967  |
| C | -2.426662 | 0.137935  | 8.675318  |
| H | -2.996682 | 1.081778  | 8.553410  |

|   |           |           |           |
|---|-----------|-----------|-----------|
| H | -2.950363 | -0.530376 | 9.381145  |
| H | -1.405037 | 0.356224  | 9.048363  |
| C | -3.212552 | -8.436041 | -0.696000 |
| H | -4.238495 | -8.130760 | -0.403851 |
| H | -3.260313 | -9.221583 | -1.470728 |
| H | -2.662941 | -8.813426 | 0.190979  |
| C | 3.293541  | -0.620569 | -8.345144 |
| H | 2.297207  | -0.866762 | -8.766155 |
| H | 3.845051  | 0.034602  | -9.042117 |
| H | 3.869860  | -1.550956 | -8.163729 |

**MeO - Stage III-b**

E= -3997.6431626

G= -3997.177490

N -1.401556 0.684878 -0.511268

C -1.568794 1.859690 -0.788942

S -1.924620 3.368666 -1.184345

Co 0.182185 -0.117347 0.081404

C -0.101827 1.219062 2.729439

C -0.626834 1.012744 4.059952

C -1.192069 -0.284098 4.066679

C -0.987331 -0.831693 2.713516

N -0.300130 0.087175 1.940644

C 1.629441 2.251352 -0.971649

C 1.926729 3.625570 -0.642384

C 1.516016 3.813574 0.698743

C 0.972182 2.522755 1.148785

N 1.078413 1.588197 0.128491

C 0.579076 -1.524485 -2.514132

C 1.159529 -1.342608 -3.825415

C 1.747539 -0.056044 -3.826282

C 1.491955 0.514950 -2.492672

N 0.815166 -0.404652 -1.713520

C -1.232337 -2.523426 1.153420

C -1.697927 -3.836545 0.767369  
C -1.295070 -4.021641 -0.576198  
C -0.588681 -2.788661 -0.967825  
N -0.559105 -1.910536 0.097521  
N -1.428625 -2.026206 2.372413  
N 0.465391 2.362959 2.353999  
N 1.860056 1.741141 -2.177528  
N -0.076041 -2.630605 -2.173047  
C 2.394002 0.459640 -4.937004  
C -1.559272 -5.189855 -1.271267  
C -2.392194 -4.845725 1.456147  
C -1.799377 -0.818166 5.190943  
C -0.660307 1.819012 5.210236  
C 1.634291 5.034994 1.342326  
C 2.480483 4.684822 -1.381701  
C 1.214131 -2.159537 -4.967642  
C 1.863552 -1.666669 -6.109144  
H 1.913902 -2.291041 -7.010772  
C 2.449130 -0.372006 -6.102893  
C -2.269170 -6.219207 -0.570363  
C -2.678719 -6.039986 0.778275  
H -3.221230 -6.838272 1.301301  
C -1.833453 0.002805 6.365353

|   |           |           |           |
|---|-----------|-----------|-----------|
| C | -1.266948 | 1.305757  | 6.366210  |
| H | -1.302950 | 1.922567  | 7.273729  |
| C | 2.607170  | 5.934827  | -0.759929 |
| H | 3.030137  | 6.775061  | -1.325701 |
| C | 2.189267  | 6.117811  | 0.586813  |
| H | 0.758665  | -3.160341 | -4.974482 |
| H | 2.850862  | 1.459131  | -4.955927 |
| H | -1.249327 | -5.352244 | -2.313293 |
| H | -2.705382 | -4.710205 | 2.501498  |
| H | -2.246943 | -1.821824 | 5.212206  |
| H | -0.225261 | 2.828900  | 5.211137  |
| H | 1.317349  | 5.198867  | 2.381901  |
| H | 2.801711  | 4.545382  | -2.423975 |
| O | 2.270466  | 7.283490  | 1.248470  |
| O | 3.083763  | 0.174292  | -7.153000 |
| O | -2.498177 | -7.331127 | -1.288211 |
| O | -2.435102 | -0.559571 | 7.426569  |
| C | 2.798329  | 8.441189  | 0.577633  |
| H | 2.182829  | 8.693375  | -0.310438 |
| H | 2.749362  | 9.262206  | 1.314550  |
| H | 3.851204  | 8.270288  | 0.271996  |
| C | -2.533291 | 0.179048  | 8.656546  |
| H | -3.111867 | 1.113958  | 8.506444  |

|   |           |           |           |
|---|-----------|-----------|-----------|
| H | -3.065229 | -0.483504 | 9.361892  |
| H | -1.524295 | 0.418035  | 9.051430  |
| C | -3.197220 | -8.432361 | -0.682860 |
| H | -4.219947 | -8.127685 | -0.378948 |
| H | -3.253647 | -9.214572 | -1.460383 |
| H | -2.638965 | -8.814158 | 0.196826  |
| C | 3.191755  | -0.570860 | -8.378072 |
| H | 2.186039  | -0.797440 | -8.788280 |
| H | 3.744482  | 0.081085  | -9.077303 |
| H | 3.754651  | -1.513046 | -8.214644 |

**MeO - Stage IV**



E= -4488.7161401

G= -4488.249618

N -1.469342 0.710951 -0.743116

C -1.838717 1.857381 -0.824426

S -2.450877 3.341370 -0.938248

Co 0.047147 -0.096094 -0.079525

C -0.384845 1.299620 2.518541

C -1.054779 1.141238 3.793750

C -1.615489 -0.157581 3.794307

C -1.267736 -0.757811 2.500665

N -0.511867 0.133411 1.759571

C 1.580724 2.240761 -1.092482

C 1.942236 3.596870 -0.732955

C 1.475287 3.802373 0.587961

C 0.838073 2.547324 0.999592

N 0.947494 1.609614 -0.015776

C 0.544404 -1.541703 -2.643450

C 1.119709 -1.344462 -3.959598

C 1.690659 -0.048944 -3.959000

C 1.443750 0.507744 -2.624058

N 0.778410 -0.419550 -1.843927

C -1.347275 -2.515516 0.996574

C -1.725513 -3.867170 0.631549  
C -1.281220 -4.062957 -0.698130  
C -0.630877 -2.810043 -1.102054  
N -0.670561 -1.903125 -0.060792  
N -1.627865 -1.988914 2.179336  
N 0.251664 2.411179 2.175851  
N 1.821892 1.731376 -2.291862  
N -0.094057 -2.651684 -2.301490  
C 2.329956 0.477396 -5.076152  
C -1.466941 -5.266683 -1.369008  
C -2.381617 -4.895693 1.326620  
C -2.354599 -0.642576 4.866816  
C -1.237235 2.001799 4.887635  
C 1.631416 5.017200 1.246513  
C 2.589251 4.628708 -1.432816  
C 1.181282 -2.153939 -5.105569  
C 1.816577 -1.644671 -6.247696  
H 1.868945 -2.263966 -7.152926  
C 2.387574 -0.341320 -6.239988  
C -2.130195 -6.311021 -0.663074  
C -2.582603 -6.120089 0.671977  
H -3.093065 -6.934164 1.203042  
C -2.536158 0.227877 5.978695

|   |           |           |           |
|---|-----------|-----------|-----------|
| C | -1.982318 | 1.538811  | 5.981836  |
| H | -2.137790 | 2.201221  | 6.843583  |
| C | 2.755331  | 5.865013  | -0.792657 |
| H | 3.252782  | 6.683522  | -1.329246 |
| C | 2.281912  | 6.064759  | 0.534835  |
| H | 0.741887  | -3.162060 | -5.116111 |
| H | 2.775710  | 1.482011  | -5.089536 |
| H | -1.124360 | -5.433592 | -2.400031 |
| H | -2.730085 | -4.753688 | 2.360061  |
| H | -2.799202 | -1.647605 | 4.878077  |
| H | -0.815015 | 3.017084  | 4.890751  |
| H | 1.267564  | 5.191430  | 2.268922  |
| H | 2.953060  | 4.480387  | -2.460005 |
| S | -3.394809 | 3.234814  | 1.855600  |
| C | -3.681823 | 1.615392  | 1.723420  |
| N | -3.897021 | 0.445032  | 1.618049  |
| O | 2.400227  | 7.230996  | 1.207351  |
| O | 3.010522  | 0.213583  | -7.303683 |
| O | -2.284721 | -7.463519 | -1.352992 |
| O | -3.263484 | -0.284010 | 6.997314  |
| C | 3.021245  | 8.351120  | 0.559284  |
| H | 2.462178  | 8.641207  | -0.354956 |
| H | 2.989983  | 9.178130  | 1.291298  |

|   |           |           |           |
|---|-----------|-----------|-----------|
| H | 4.076105  | 8.124837  | 0.297485  |
| C | 3.106576  | -0.534490 | -8.524749 |
| H | 2.099055  | -0.771787 | -8.926043 |
| H | 3.644610  | 0.117536  | -9.236176 |
| H | 3.679754  | -1.472990 | -8.372354 |
| C | -2.933436 | -8.575022 | -0.717969 |
| H | -2.934583 | -9.390019 | -1.464047 |
| H | -2.375082 | -8.898008 | 0.185735  |
| H | -3.978353 | -8.321347 | -0.441642 |
| C | -3.502178 | 0.523834  | 8.158817  |
| H | -4.066642 | 1.442897  | 7.895453  |
| H | -4.106996 | -0.100129 | 8.841226  |
| H | -2.547884 | 0.800182  | 8.654376  |

**MeO - Stage V**

E= -4488.7174542

G= -4488.249072

N -1.564061 0.706337 -0.915375

C -1.644628 1.735115 -1.557903

S -1.890986 3.047332 -2.440639

Co -0.066056 -0.036747 -0.088934

C -0.607896 1.397701 2.471494

C -1.251918 1.228134 3.762838

C -1.795995 -0.076692 3.767639

C -1.451681 -0.672652 2.467239

N -0.709906 0.227579 1.721257

C 1.520717 2.271252 -1.053602

C 1.953509 3.599866 -0.671049

C 1.479049 3.812151 0.644450

C 0.750541 2.590477 1.023759

N 0.828839 1.661329 -0.016114

C 0.449990 -1.480670 -2.632647

C 0.992111 -1.270614 -3.960353

C 1.579155 0.016154 -3.954002

C 1.364854 0.559531 -2.602627

N 0.706999 -0.374110 -1.820948

C -1.417020 -2.472612 1.014556

C -1.719852 -3.851075 0.677378  
C -1.266279 -4.048267 -0.647165  
C -0.683051 -2.765577 -1.076115  
N -0.770453 -1.844228 -0.057542  
N -1.730473 -1.938048 2.180435  
N 0.117950 2.482888 2.164523  
N 1.766835 1.767619 -2.262550  
N -0.167451 -2.601915 -2.283870  
C 2.206854 0.547957 -5.070409  
C -1.389644 -5.267764 -1.297141  
C -2.322869 -4.896989 1.392025  
C -2.482878 -0.587969 4.861507  
C -1.385880 2.064502 4.880847  
C 1.693179 5.003641 1.322282  
C 2.669788 4.599510 -1.347768  
C 1.026189 -2.069241 -5.114032  
C 1.650062 -1.555535 -6.261682  
H 1.681525 -2.165955 -7.173767  
C 2.236972 -0.261317 -6.247878  
C -1.997206 -6.335958 -0.568198  
C -2.458227 -6.144338 0.761744  
H -2.925431 -6.973255 1.309272  
C -2.630719 0.264459 5.992510

|   |           |           |           |
|---|-----------|-----------|-----------|
| C | -2.081263 | 1.576740  | 5.997119  |
| H | -2.200381 | 2.221483  | 6.877859  |
| C | 2.902507  | 5.814525  | -0.685908 |
| H | 3.456692  | 6.609006  | -1.202488 |
| C | 2.421790  | 6.022018  | 0.635869  |
| H | 0.576075  | -3.072487 | -5.127002 |
| H | 2.668661  | 1.545313  | -5.078932 |
| H | -1.041455 | -5.435389 | -2.326152 |
| H | -2.680429 | -4.752462 | 2.421932  |
| H | -2.909739 | -1.600505 | 4.876519  |
| H | -0.966910 | 3.081084  | 4.885858  |
| H | 1.324106  | 5.186385  | 2.341394  |
| H | 3.035877  | 4.444478  | -2.373032 |
| S | -3.031848 | 2.789029  | 1.450664  |
| C | -3.607999 | 1.255824  | 1.487636  |
| N | -3.988227 | 0.119392  | 1.551295  |
| O | 2.601043  | 7.162678  | 1.332035  |
| O | 2.853361  | 0.298752  | -7.307230 |
| O | -2.086638 | -7.503627 | -1.236912 |
| O | -3.316255 | -0.268866 | 7.028647  |
| C | 3.312160  | 8.251493  | 0.721869  |
| H | 2.791348  | 8.599059  | -0.194719 |
| H | 3.324342  | 9.061197  | 1.473244  |

|   |           |           |           |
|---|-----------|-----------|-----------|
| H | 4.352493  | 7.954762  | 0.473850  |
| C | 2.935609  | -0.435522 | -8.539270 |
| H | 1.922750  | -0.657587 | -8.934930 |
| H | 3.475986  | 0.220612  | -9.244676 |
| H | 3.500193  | -1.380704 | -8.398321 |
| C | -2.668801 | -8.641375 | -0.581488 |
| H | -2.620557 | -9.467560 | -1.313199 |
| H | -2.091901 | -8.911649 | 0.327488  |
| H | -3.726592 | -8.442985 | -0.309717 |
| C | -3.523660 | 0.521777  | 8.207865  |
| H | -4.098568 | 1.442159  | 7.973312  |
| H | -4.106174 | -0.113912 | 8.898761  |
| H | -2.556417 | 0.794908  | 8.679467  |

**H-Stage I**



E= -3540.2264589

G= -3539.873673

N -1.507806 0.696728 -0.541532

C -1.747085 1.871232 -0.750173

S -2.202725 3.376100 -1.062272

Co 0.085145 -0.084513 0.032251

C -1.237031 -2.547276 1.090430

C -1.638350 -3.893715 0.691455

C -1.228767 -4.048218 -0.654712

C -0.590640 -2.791364 -1.036077

N -0.599489 -1.910192 0.035581

C -0.227175 1.215292 2.692775

C -0.783207 0.984095 4.022471

C -1.314068 -0.327895 4.008783

C -1.068628 -0.857669 2.670420

N -0.388219 0.082367 1.906914

C 1.480901 2.323975 -0.993155

C 1.784080 3.701808 -0.625104

C 1.376795 3.854360 0.722279

C 0.836026 2.565826 1.137867

N 0.937149 1.649409 0.095441

C 0.521891 -1.457623 -2.572464

|   |           |           |           |
|---|-----------|-----------|-----------|
| C | 1.080458  | -1.228763 | -3.901993 |
| C | 1.610438  | 0.083552  | -3.892032 |
| C | 1.362485  | 0.616303  | -2.556168 |
| N | 0.730123  | -0.340775 | -1.772808 |
| N | -0.081605 | -2.589223 | -2.242132 |
| N | -1.461888 | -2.068282 | 2.304669  |
| N | 0.325097  | 2.366645  | 2.342617  |
| N | 1.701644  | 1.848055  | -2.208432 |
| C | 1.508558  | 5.083714  | 1.390580  |
| C | 2.225816  | 0.631881  | -5.029787 |
| C | 1.150906  | -2.035154 | -5.050407 |
| C | -1.449032 | -5.247848 | -1.351931 |
| C | -2.281269 | -4.934362 | 1.382528  |
| C | -1.931913 | -0.877427 | 5.144619  |
| C | -0.854929 | 1.788717  | 5.171960  |
| C | 2.336323  | 4.774051  | -1.346735 |
| C | 2.464384  | 6.003684  | -0.680744 |
| H | 2.886318  | 6.868817  | -1.215121 |
| C | 2.056397  | 6.156353  | 0.668700  |
| C | 2.294208  | -0.172756 | -6.179429 |
| C | 1.764937  | -1.487383 | -6.189257 |
| H | 1.836706  | -2.088696 | -7.108679 |
| C | -2.094424 | -6.288160 | -0.662397 |

|   |           |           |           |
|---|-----------|-----------|-----------|
| C | -2.504660 | -6.133583 | 0.685152  |
| H | -3.005940 | -6.971482 | 1.193770  |
| C | -1.474518 | 1.240799  | 6.307736  |
| H | -1.550930 | 1.841925  | 7.226900  |
| C | -2.004792 | -0.073359 | 6.294462  |
| H | 2.648328  | 4.654810  | -2.394722 |
| H | 1.187544  | 5.200719  | 2.436116  |
| H | 2.635838  | 1.652553  | -5.019571 |
| H | 0.739443  | -3.055240 | -5.056747 |
| H | -1.126478 | -5.367094 | -2.396827 |
| H | -2.595510 | -4.814367 | 2.429869  |
| H | 2.766937  | 0.223379  | -7.091390 |
| H | 2.169487  | 7.136956  | 1.156229  |
| H | -2.284649 | -7.243199 | -1.176084 |
| H | -2.342957 | -1.897658 | 5.132044  |
| H | -2.482944 | -0.469333 | 7.203671  |
| H | -0.442732 | 2.808503  | 5.180594  |

## **H-Stage II**

E= -3540.0338265

G= -3539.682147

N -1.507215 0.683923 -0.541065

C -1.731603 1.863347 -0.747807

S -2.164057 3.373240 -1.055790

Co 0.095156 -0.087133 0.035541

C -1.252443 -2.533576 1.081394

C -1.680608 -3.872810 0.674092

C -1.271548 -4.027117 -0.669208

C -0.606656 -2.777356 -1.040806

N -0.603456 -1.900499 0.032739

C -0.205182 1.205354 2.695535

C -0.735615 0.963882 4.037528

C -1.274280 -0.341703 4.020415

C -1.055155 -0.859529 2.669207

N -0.382407 0.082012 1.901958

C 1.471698 2.324060 -0.992882

C 1.741067 3.715539 -0.637149

C 1.335630 3.867400 0.707972

C 0.828804 2.565001 1.134616

N 0.944929 1.642952 0.099388

C 0.534644 -1.458564 -2.563278

C 1.120686 -1.241087 -3.886518  
C 1.658330 0.064944 -3.873004  
C 1.382595 0.607833 -2.543020  
N 0.735186 -0.340827 -1.764007  
N -0.085034 -2.583772 -2.242936  
N -1.465887 -2.063092 2.300979  
N 0.332907 2.363106 2.344675  
N 1.707889 1.845618 -2.203740  
C 1.435246 5.098779 1.368628  
C 2.296763 0.606441 -4.995494  
C 1.204250 -2.054611 -5.023378  
C -1.508560 -5.213009 -1.375184  
C -2.341697 -4.899119 1.360117  
C -1.875443 -0.900646 5.154954  
C -0.780276 1.759209 5.189173  
C 2.260781 4.789827 -1.370990  
C 2.357163 6.032599 -0.712263  
H 2.752297 6.903417 -1.256943  
C 1.952264 6.184195 0.632350  
C 2.383379 -0.208869 -6.143494  
C 1.847466 -1.514545 -6.156948  
H 1.931776 -2.122389 -7.070479  
C -2.177902 -6.248800 -0.689828

|   |           |           |           |
|---|-----------|-----------|-----------|
| C | -2.586736 | -6.094718 | 0.652133  |
| H | -3.104663 | -6.924407 | 1.156566  |
| C | -1.385004 | 1.200938  | 6.335069  |
| H | -1.439734 | 1.794746  | 7.260006  |
| C | -1.921972 | -0.104217 | 6.318461  |
| H | 2.572574  | 4.670662  | -2.418644 |
| H | 1.116568  | 5.215237  | 2.414533  |
| H | 2.711617  | 1.624718  | -4.983312 |
| H | 0.784770  | -3.070978 | -5.033279 |
| H | -1.185500 | -5.332929 | -2.419445 |
| H | -2.655326 | -4.779637 | 2.407298  |
| H | 2.877082  | 0.180829  | -7.046562 |
| H | 2.039083  | 7.170406  | 1.112922  |
| H | -2.383780 | -7.196049 | -1.210955 |
| H | -2.294733 | -1.917056 | 5.139392  |
| H | -2.387093 | -0.507673 | 7.230609  |
| H | -0.363036 | 2.776500  | 5.200160  |

**H-Stage III-a**

E= -3539.8087093

G= -3539.459079

N -1.706225 0.790387 -0.622808

C -1.888838 1.799036 -1.268893

S -2.144694 3.135682 -2.124131

Co -0.020730 -0.032708 0.027811

C -1.368037 -2.470127 1.063917

C -1.941594 -3.736056 0.601754

C -1.548900 -3.878188 -0.747728

C -0.747625 -2.694022 -1.068634

N -0.686754 -1.852314 0.032035

C -0.168185 1.188970 2.727384

C -0.471189 0.856104 4.121521

C -0.984062 -0.461158 4.110939

C -0.983034 -0.891717 2.712855

N -0.451809 0.110994 1.909978

C 1.350639 2.379394 -0.994405

C 1.472720 3.806827 -0.689213

C 1.044710 3.961843 0.648322

C 0.674693 2.625814 1.117845

N 0.859095 1.695689 0.101427

C 0.571959 -1.451568 -2.509914

C 1.341351 -1.309363 -3.749313  
C 1.911231 -0.016435 -3.717463  
C 1.461270 0.599394 -2.469683  
N 0.696739 -0.309719 -1.742431  
N -0.144794 -2.534511 -2.236132  
N -1.467240 -2.058862 2.322099  
N 0.265107 2.384121 2.351334  
N 1.710269 1.859776 -2.161705  
C 1.032771 5.211306 1.272987  
C 2.695771 0.465789 -4.769022  
C 1.539948 -2.169439 -4.831583  
C -1.893782 -5.006119 -1.495450  
C -2.691807 -4.717711 1.254063  
C -1.394886 -1.097690 5.285788  
C -0.353561 1.585734 5.306458  
C 1.906309 4.894433 -1.450692  
C 1.879074 6.167517 -0.830090  
H 2.197999 7.051497 -1.402141  
C 1.451621 6.322512 0.500706  
C 2.912376 -0.405379 -5.863578  
C 2.347882 -1.693688 -5.893756  
H 2.532425 -2.344279 -6.761533  
C -2.670789 -5.997902 -0.846449



|   |           |           |           |
|---|-----------|-----------|-----------|
| C | -3.060442 | -5.857195 | 0.497094  |
| H | -3.658920 | -6.648204 | 0.972916  |
| C | -0.755334 | 0.941820  | 6.502870  |
| H | -0.669089 | 1.481082  | 7.457921  |
| C | -1.263293 | -0.370155 | 6.493034  |
| H | 2.246718  | 4.771396  | -2.488785 |
| H | 0.709100  | 5.329722  | 2.317058  |
| H | 3.125165  | 1.477673  | -4.749350 |
| H | 1.087443  | -3.170885 | -4.861863 |
| H | -1.575034 | -5.123390 | -2.541147 |
| H | -2.982545 | -4.613892 | 2.309262  |
| H | 3.531133  | -0.065649 | -6.707401 |
| H | 1.442595  | 7.325455  | 0.952718  |
| H | -2.968808 | -6.897655 | -1.405093 |
| H | -1.802343 | -2.118720 | 5.274263  |
| H | -1.567006 | -0.840017 | 7.440280  |
| H | 0.033235  | 2.614752  | 5.313749  |

### **H-Stage III-b**

E= -3539.822536

G= -3539.470784

N -1.530341 0.636239 -0.542106

C -1.769577 1.806623 -0.785109

S -2.216115 3.300995 -1.135504

Co 0.101273 -0.078485 0.038387

C -1.334784 -2.472257 1.049957

C -1.950899 -3.713407 0.575308

C -1.539534 -3.869325 -0.766459

C -0.687215 -2.717505 -1.068879

N -0.593332 -1.888338 0.036209

C -0.100562 1.174234 2.717539

C -0.433804 0.852206 4.106763

C -0.970777 -0.453368 4.090299

C -0.945635 -0.890719 2.692695

N -0.365969 0.087992 1.898468

C 1.356257 2.366035 -1.028736

C 1.438750 3.795633 -0.734115

C 1.037171 3.946260 0.612249

C 0.720781 2.604679 1.098824

N 0.916122 1.667117 0.090355

C 0.634673 -1.486885 -2.512838

C 1.399611 -1.342002 -3.753518  
C 1.929148 -0.033384 -3.742559  
C 1.469413 0.583200 -2.496587  
N 0.743351 -0.332621 -1.750219  
N -0.073649 -2.568905 -2.233261  
N -1.454301 -2.047073 2.298294  
N 0.330845 2.366019 2.339304  
N 1.688966 1.853871 -2.201282  
C 0.996137 5.199538 1.229575  
C 2.697994 0.455283 -4.801278  
C 1.621815 -2.212981 -4.823047  
C -1.915464 -4.981304 -1.523730  
C -2.753131 -4.664188 1.210790  
C -1.421286 -1.075312 5.257327  
C -0.332202 1.587606 5.289857  
C 1.813159 4.893244 -1.514354  
C 1.754613 6.167646 -0.901844  
H 2.025874 7.058756 -1.487245  
C 1.355575 6.317330 0.439721  
C 2.940041 -0.426885 -5.883344  
C 2.414724 -1.730967 -5.893636  
H 2.618336 -2.389669 -6.750908  
C -2.744550 -5.941218 -0.892226

|   |           |           |           |
|---|-----------|-----------|-----------|
| C | -3.153873 | -5.786239 | 0.443938  |
| H | -3.794084 | -6.552212 | 0.906295  |
| C | -0.774195 | 0.958691  | 6.480231  |
| H | -0.702139 | 1.502678  | 7.433737  |
| C | -1.305332 | -0.342945 | 6.464544  |
| H | 2.132145  | 4.774398  | -2.559671 |
| H | 0.691909  | 5.314067  | 2.279780  |
| H | 3.097236  | 1.479620  | -4.798565 |
| H | 1.198943  | -3.227704 | -4.836574 |
| H | -1.581914 | -5.109497 | -2.563515 |
| H | -3.059702 | -4.550394 | 2.260463  |
| H | 3.548210  | -0.081239 | -6.732497 |
| H | 1.320852  | 7.323232  | 0.883829  |
| H | -3.069402 | -6.826658 | -1.458663 |
| H | -1.849448 | -2.087806 | 5.241591  |
| H | -1.642438 | -0.801752 | 7.405896  |
| H | 0.071731  | 2.610052  | 5.300042  |

#### **H-Stage IV**

E= -4030.9088875

G= -4030.555717

N -1.505600 -0.042207 0.047512

C -2.369201 0.781265 0.131479

S -3.602735 1.841070 0.239110

Co 0.326068 -0.370820 0.003146

C 0.168673 -3.351919 -0.047476

C 0.040506 -4.474535 -0.972277

C 0.014310 -3.917592 -2.273957

C 0.136468 -2.471973 -2.105258

N 0.247354 -2.161960 -0.758194

C 0.403485 -0.429084 2.978916

C 0.313261 -1.351138 4.107565

C 0.235924 -2.651786 3.554116

C 0.267774 -2.484498 2.103313

N 0.388642 -1.139070 1.785780

C 0.796810 2.565952 0.046004

C 0.890626 3.691017 0.968412

C 0.765628 3.152401 2.270940

C 0.628809 1.708675 2.108819

N 0.667939 1.380685 0.759393

C 0.293043 -0.325801 -2.972905

|   |           |           |           |
|---|-----------|-----------|-----------|
| C | 0.325453  | 0.604496  | -4.098968 |
| C | 0.531846  | 1.891966  | -3.547327 |
| C | 0.613998  | 1.711464  | -2.101446 |
| N | 0.473935  | 0.367858  | -1.783840 |
| N | 0.136875  | -1.631852 | -3.130619 |
| N | 0.179292  | -3.509551 | 1.267815  |
| N | 0.500081  | 0.882717  | 3.136665  |
| N | 0.798176  | 2.722576  | -1.267567 |
| C | 0.740575  | 3.983189  | 3.403481  |
| C | 0.608732  | 3.033881  | -4.361551 |
| C | 0.197247  | 0.418170  | -5.485431 |
| C | -0.109363 | -4.730456 | -3.412871 |
| C | -0.057760 | -5.861283 | -0.769345 |
| C | 0.141792  | -3.788973 | 4.373082  |
| C | 0.300468  | -1.147095 | 5.497249  |
| C | 0.978387  | 5.075841  | 0.753741  |
| C | 0.945602  | 5.907981  | 1.886163  |
| H | 1.006428  | 6.999760  | 1.758557  |
| C | 0.831740  | 5.369267  | 3.191637  |
| C | 0.474749  | 2.848455  | -5.747913 |
| C | 0.273697  | 1.559639  | -6.301557 |
| H | 0.173185  | 1.453313  | -7.392756 |
| C | -0.208759 | -6.117508 | -3.210588 |

|   |           |           |           |
|---|-----------|-----------|-----------|
| C | -0.183273 | -6.674800 | -1.908014 |
| H | -0.264549 | -7.766206 | -1.788571 |
| C | 0.203136  | -2.284069 | 6.317549  |
| H | 0.186210  | -2.163380 | 7.411696  |
| C | 0.125298  | -3.585677 | 5.763669  |
| H | 1.052633  | 5.490543  | -0.262125 |
| H | 0.637877  | 3.564773  | 4.415574  |
| H | 0.759470  | 4.033210  | -3.928188 |
| H | 0.039128  | -0.582454 | -5.914151 |
| H | -0.129354 | -4.296545 | -4.423472 |
| H | -0.038372 | -6.291759 | 0.242726  |
| H | 0.525448  | 3.719634  | -6.419147 |
| H | 0.806299  | 6.052426  | 4.054521  |
| H | -0.308796 | -6.786406 | -4.079286 |
| H | 0.081538  | -4.798991 | 3.941602  |
| H | 0.050068  | -4.452971 | 6.437608  |
| H | 0.361570  | -0.135642 | 5.925274  |
| S | -2.374956 | 4.067116  | 0.627607  |
| C | -2.057392 | 4.416578  | -0.969953 |
| N | -1.840016 | 4.697398  | -2.105448 |

### **H-Stage V**

E= -4030.9022574

G= -4030.547361

N -1.408668 -0.005678 0.083377

C -2.304819 0.758394 0.266965

S -3.591752 1.746132 0.479787

Co 0.395107 -0.345646 0.015567

C 0.102395 -3.303107 -0.051869

C -0.189973 -4.404873 -0.970247

C -0.233667 -3.840810 -2.265705

C 0.029270 -2.412140 -2.101077

N 0.235567 -2.123590 -0.749272

C 0.518037 -0.430475 2.978880

C 0.533354 -1.366311 4.104006

C 0.483539 -2.662477 3.542450

C 0.399954 -2.480778 2.094011

N 0.474259 -1.119688 1.785435

C 0.826301 2.577751 0.073270

C 0.744671 3.710765 0.986191

C 0.608226 3.169960 2.284590

C 0.627572 1.720020 2.130289

N 0.749213 1.392268 0.774630

C 0.357974 -0.282036 -2.948377



|   |           |           |           |
|---|-----------|-----------|-----------|
| C | 0.526133  | 0.631223  | -4.080146 |
| C | 0.829309  | 1.897208  | -3.529224 |
| C | 0.802077  | 1.731292  | -2.079051 |
| N | 0.551843  | 0.388222  | -1.762618 |
| N | 0.080159  | -1.573626 | -3.116421 |
| N | 0.222501  | -3.487022 | 1.260126  |
| N | 0.542421  | 0.887432  | 3.150175  |
| N | 0.937947  | 2.736381  | -1.242265 |
| C | 0.395487  | 3.993363  | 3.399666  |
| C | 1.046081  | 3.018586  | -4.341987 |
| C | 0.441421  | 0.439109  | -5.465030 |
| C | -0.490704 | -4.626295 | -3.397553 |
| C | -0.395426 | -5.774484 | -0.761411 |
| C | 0.482380  | -3.809395 | 4.347771  |
| C | 0.592657  | -1.171036 | 5.489350  |
| C | 0.637458  | 5.087524  | 0.750098  |
| C | 0.404955  | 5.917800  | 1.871568  |
| H | 0.304719  | 7.003857  | 1.725269  |
| C | 0.295361  | 5.381054  | 3.171477  |
| C | 0.961213  | 2.829762  | -5.735283 |
| C | 0.665508  | 1.562864  | -6.286502 |
| H | 0.604420  | 1.452544  | -7.379875 |
| C | -0.707481 | -6.003533 | -3.191292 |

|   |           |           |           |
|---|-----------|-----------|-----------|
| C | -0.659863 | -6.567265 | -1.897190 |
| H | -0.835053 | -7.646751 | -1.773206 |
| C | 0.596723  | -2.322890 | 6.303213  |
| H | 0.639407  | -2.210486 | 7.397193  |
| C | 0.542449  | -3.617961 | 5.742975  |
| H | 0.719171  | 5.503522  | -0.264463 |
| H | 0.286199  | 3.571562  | 4.409392  |
| H | 1.271361  | 4.003603  | -3.908658 |
| H | 0.204147  | -0.545199 | -5.894038 |
| H | -0.522814 | -4.186078 | -4.404743 |
| H | -0.356854 | -6.212695 | 0.246371  |
| H | 1.127298  | 3.684492  | -6.408349 |
| H | 0.113371  | 6.056893  | 4.020391  |
| H | -0.916474 | -6.653034 | -4.054801 |
| H | 0.437597  | -4.816936 | 3.909486  |
| H | 0.546747  | -4.494042 | 6.409026  |
| H | 0.629356  | -0.162042 | 5.924969  |
| S | -2.377909 | 3.979934  | 0.450702  |
| C | -2.075338 | 4.005801  | -1.189406 |
| N | -1.860396 | 4.034376  | -2.358084 |

### **F-Stage I**

E= -5126.6841716

G= -5126.480070

N -1.502020 0.674337 -0.550070

C -1.736923 1.850993 -0.758776

S -2.186357 3.355701 -1.071528

Co 0.098381 -0.088127 0.036660

C -1.233904 -2.542787 1.092513

C -1.637868 -3.886381 0.694223

C -1.215201 -4.047170 -0.650868

C -0.569110 -2.795577 -1.029030

N -0.587405 -1.915639 0.040499

C -0.230093 1.220594 2.688746

C -0.786906 0.990741 4.015990

C -1.319486 -0.324444 4.002398

C -1.070797 -0.854568 2.666859

N -0.389464 0.086044 1.908682

C 1.473582 2.325331 -0.996217

C 1.753210 3.708540 -0.638009

C 1.341729 3.863458 0.711673

C 0.820480 2.571504 1.133927

N 0.935600 1.655451 0.095609

C 0.554168 -1.470434 -2.556978  
C 1.123434 -1.247207 -3.880584  
C 1.650163 0.070421 -3.872729  
C 1.385942 0.609132 -2.544543  
N 0.752419 -0.348274 -1.766169  
N -0.049601 -2.600781 -2.229847  
N -1.465504 -2.063412 2.303300  
N 0.313571 2.374062 2.338823  
N 1.709901 1.845428 -2.205046  
C 1.452982 5.100249 1.361515  
C 2.271527 0.604868 -5.008954  
C 1.212851 -2.050172 -5.025193  
C -1.435694 -5.249335 -1.335444  
C -2.287555 -4.925208 1.373141  
C -1.936116 -0.863006 5.139279  
C -0.865987 1.787327 5.165621  
C 2.282569 4.788846 -1.357318  
C 2.388611 6.030938 -0.706766  
F 2.880406 7.089404 -1.357674  
C 1.980426 6.184560 0.638249  
C 2.359242 -0.200504 -6.158713  
C 1.834887 -1.512793 -6.166730  
F 1.939402 -2.244290 -7.280686

C -2.090669 -6.291697 -0.654528  
C -2.511986 -6.131392 0.684563  
F -3.129220 -7.147445 1.295684  
C -1.487284 1.247353 6.306256  
F -1.586032 1.974001 7.423909  
C -2.016816 -0.062758 6.293245  
F 2.678319 4.690590 -2.629902  
F 1.075865 5.291565 2.629041  
F 2.780008 1.840357 -5.046859  
F 0.733689 -3.296743 -5.078643  
F -1.051642 -5.446971 -2.600407  
F -2.698189 -4.820458 2.640854  
F 2.941650 0.271221 -7.265386  
F 2.100065 7.383004 1.217298  
F -2.320317 -7.455255 -1.271243  
F -2.448737 -2.096901 5.173727  
F -2.598180 -0.537372 7.399234  
F -0.380014 3.031081 5.223322

## **F-Stage II**

E= -5126.4855978

G= -5126.281643

N -1.503394 0.621866 -0.548126

C -1.905882 1.768452 -0.460723

S -2.574660 3.220661 -0.416859

Co 0.124646 -0.091130 0.029207

C -1.215038 -2.535203 1.081060

C -1.649937 -3.868086 0.675076

C -1.231061 -4.029852 -0.668814

C -0.553521 -2.790464 -1.037629

N -0.554666 -1.915541 0.034694

C -0.209019 1.225431 2.670151

C -0.751564 0.991903 4.003792

C -1.279163 -0.322958 3.993366

C -1.038585 -0.851647 2.654529

N -0.364727 0.090244 1.890708

C 1.458293 2.331385 -1.022499

C 1.724142 3.722124 -0.673640

C 1.312233 3.881413 0.672971

C 0.803806 2.584826 1.102992

N 0.918661 1.665166 0.069633

C 0.590727 -1.479848 -2.557606

C 1.182820 -1.268186 -3.874837  
C 1.709234 0.047329 -3.868123  
C 1.415365 0.598405 -2.549635  
N 0.774545 -0.352264 -1.772246  
N -0.024216 -2.605476 -2.236073  
N -1.440275 -2.058710 2.294294  
N 0.316237 2.386300 2.315757  
N 1.718859 1.843717 -2.222795  
C 1.416899 5.117066 1.319127  
C 2.345056 0.576372 -4.994889  
C 1.284757 -2.078606 -5.009257  
C -1.485111 -5.214625 -1.365563  
C -2.329416 -4.888747 1.345929  
C -1.890849 -0.863810 5.128020  
C -0.828191 1.790269 5.148535  
C 2.252179 4.795883 -1.397160  
C 2.356007 6.048772 -0.748651  
F 2.847232 7.095754 -1.407391  
C 1.947698 6.206428 0.589802  
C 2.450191 -0.240087 -6.145247  
C 1.925612 -1.546490 -6.153014  
F 2.040306 -2.288377 -7.252506  
C -2.176969 -6.248838 -0.691972

|   |           |           |           |
|---|-----------|-----------|-----------|
| C | -2.593015 | -6.088068 | 0.642960  |
| F | -3.240191 | -7.080986 | 1.249295  |
| C | -1.446388 | 1.246932  | 6.299044  |
| F | -1.538398 | 1.977479  | 7.408191  |
| C | -1.970661 | -0.059609 | 6.288972  |
| F | 2.650570  | 4.697313  | -2.661468 |
| F | 1.041121  | 5.314725  | 2.578601  |
| F | 2.852527  | 1.804495  | -5.036503 |
| F | 0.807359  | -3.318104 | -5.065081 |
| F | -1.109745 | -5.414584 | -2.625192 |
| F | -2.737578 | -4.786221 | 2.607035  |
| F | 3.048472  | 0.229752  | -7.237595 |
| F | 2.062185  | 7.398726  | 1.170177  |
| F | -2.438028 | -7.390912 | -1.324392 |
| F | -2.400408 | -2.091078 | 5.166749  |
| F | -2.546060 | -0.540438 | 7.388696  |
| F | -0.351017 | 3.029759  | 5.206120  |

**F-Stage III-a**



E= -5126.2573789

G= -5126.054116

N -1.707837 0.725872 -0.570545

C -2.517040 1.391283 0.038587

S -3.602336 2.279167 0.823280

Co 0.037538 -0.038503 -0.035017

C -1.106598 -2.541871 1.091201

C -1.338479 -3.944018 0.758372

C -0.913990 -4.109723 -0.583817

C -0.437646 -2.805008 -1.027575

N -0.536923 -1.893294 0.011536

C -0.316257 1.299855 2.584729

C -1.043357 1.148048 3.841304

C -1.576222 -0.164170 3.835683

C -1.157514 -0.771234 2.575616

N -0.415130 0.139105 1.840846

C 1.567410 2.307081 -1.028012

C 2.071930 3.607800 -0.598825

C 1.676214 3.762603 0.753097

C 0.938431 2.555305 1.104734

N 0.930228 1.681627 0.027522

C 0.460028 -1.407044 -2.633274

C 0.902205 -1.142401 -3.999330  
C 1.413442 0.177998 -4.002509  
C 1.267825 0.676028 -2.637208  
N 0.664823 -0.288455 -1.847990  
N -0.018011 -2.586179 -2.262505  
N -1.448837 -2.022680 2.260247  
N 0.342111 2.407644 2.276230  
N 1.704577 1.870510 -2.270989  
C 1.972585 4.927471 1.464304  
C 1.939224 0.744361 -5.164430  
C 0.911890 -1.922109 -5.156677  
C -1.014724 -5.345794 -1.226480  
C -1.874973 -5.011413 1.480737  
C -2.331229 -0.638075 4.909415  
C -1.257516 2.010280 4.917661  
C 2.774941 4.614207 -1.262953  
C 3.086564 5.801112 -0.542689  
F 3.754539 6.773652 -1.146585  
C 2.692208 5.955557 0.795509  
C 1.939283 -0.039168 -6.353235  
C 1.435262 -1.347643 -6.349051  
F 1.443222 -2.059731 -7.467564  
C -1.558658 -6.438305 -0.496097

|   |           |           |           |
|---|-----------|-----------|-----------|
| C | -1.977223 | -6.274717 | 0.833724  |
| F | -2.478348 | -7.307926 | 1.495569  |
| C | -2.036928 | 1.538609  | 6.011337  |
| F | -2.269165 | 2.340220  | 7.041641  |
| C | -2.563933 | 0.239115  | 6.006575  |
| F | 3.161769  | 4.523633  | -2.523831 |
| F | 1.617522  | 5.122753  | 2.722358  |
| F | 2.433977  | 1.969087  | -5.219123 |
| F | 0.456668  | -3.162327 | -5.204581 |
| F | -0.635462 | -5.549926 | -2.476082 |
| F | -2.288953 | -4.910009 | 2.732207  |
| F | 2.421395  | 0.477027  | -7.475217 |
| F | 2.991897  | 7.071870  | 1.444753  |
| F | -1.670063 | -7.623650 | -1.079069 |
| F | -2.844265 | -1.855373 | 4.959703  |
| F | -3.289992 | -0.180775 | 7.033350  |
| F | -0.782102 | 3.242639  | 4.969434  |

**F-Stage III-b**

E= -5126.2705556

G= -5126.064448

N -1.511160 0.576584 -0.559265

C -1.919810 1.724705 -0.577432

S -2.613202 3.161517 -0.665841

Co 0.131257 -0.091820 0.036836

C -1.212499 -2.530374 1.085736

C -1.662378 -3.856334 0.674243

C -1.244041 -4.017719 -0.668066

C -0.551334 -2.785289 -1.030452

N -0.542450 -1.914479 0.044705

C -0.201880 1.223421 2.675032

C -0.727438 0.983265 4.014394

C -1.255800 -0.329415 4.003505

C -1.030341 -0.851575 2.659907

N -0.367803 0.094417 1.891026

C 1.444264 2.336706 -1.018987

C 1.702722 3.729333 -0.672375

C 1.296989 3.886387 0.674654

C 0.796270 2.587567 1.106676

N 0.906788 1.668132 0.072514

C 0.598407 -1.477981 -2.545542

C 1.198860 -1.269409 -3.858997  
C 1.724242 0.044755 -3.851874  
C 1.417017 0.600336 -2.538675  
N 0.774787 -0.348587 -1.761452  
N -0.019338 -2.603261 -2.228256  
N -1.435710 -2.057614 2.301297  
N 0.319407 2.387302 2.323222  
N 1.711918 1.849338 -2.217613  
C 1.402460 5.118993 1.322869  
C 2.361115 0.574982 -4.975062  
C 1.302415 -2.080785 -4.990459  
C -1.508159 -5.195054 -1.370085  
C -2.351907 -4.869853 1.341737  
C -1.861593 -0.874315 5.137208  
C -0.795717 1.778453 5.159425  
C 2.226160 4.801834 -1.397660  
C 2.333071 6.062294 -0.745823  
F 2.819885 7.101016 -1.410090  
C 1.932843 6.217218 0.590209  
C 2.472392 -0.245852 -6.132184  
C 1.949353 -1.547626 -6.140843  
F 2.062714 -2.294143 -7.230829  
C -2.215365 -6.231945 -0.698578

|   |           |           |           |
|---|-----------|-----------|-----------|
| C | -2.629264 | -6.072117 | 0.631834  |
| F | -3.285158 | -7.051033 | 1.239651  |
| C | -1.410631 | 1.230311  | 6.319821  |
| F | -1.489667 | 1.961308  | 7.423228  |
| C | -1.934403 | -0.071098 | 6.309367  |
| F | 2.618870  | 4.708730  | -2.656302 |
| F | 1.035926  | 5.316617  | 2.577184  |
| F | 2.864390  | 1.796515  | -5.019320 |
| F | 0.827436  | -3.312831 | -5.050052 |
| F | -1.136518 | -5.396518 | -2.622395 |
| F | -2.759205 | -4.771277 | 2.595301  |
| F | 3.073342  | 0.229541  | -7.213965 |
| F | 2.046717  | 7.400204  | 1.177540  |
| F | -2.482607 | -7.360784 | -1.340712 |
| F | -2.372080 | -2.092924 | 5.176530  |
| F | -2.502124 | -0.560947 | 7.402581  |
| F | -0.322436 | 3.011177  | 5.220956  |

#### **F-Stage IV**

E= -5617.3640493

G= -5617.158814

N -1.548071 0.689871 -0.319154

C -2.160706 1.241574 -1.169231

S -3.026903 2.010527 -2.369774

Co 0.174541 -0.088994 0.301803

C -1.045239 -2.590712 1.353558

C -1.521211 -3.902543 0.918196

C -1.219248 -3.995030 -0.463382

C -0.568249 -2.737608 -0.825057

N -0.485333 -1.914722 0.283930

C 0.107918 1.085092 3.032107

C -0.280496 0.774600 4.405740

C -0.796938 -0.545016 4.383565

C -0.711910 -0.993471 2.994834

N -0.146513 -0.000629 2.213283

C 1.452051 2.381598 -0.733031

C 1.810104 3.739178 -0.327171

C 1.515504 3.829895 1.056123

C 0.984454 2.526406 1.448343

N 0.960343 1.679533 0.353284

C 0.459922 -1.358426 -2.373792

C 0.930731 -1.080331 -3.728108  
C 1.431008 0.245590 -3.710978  
C 1.271952 0.726087 -2.339591  
N 0.707853 -0.267775 -1.558080  
N -0.133268 -2.497257 -2.052582  
N -1.148651 -2.182628 2.609236  
N 0.608451 2.262662 2.689830  
N 1.612588 1.952027 -1.975593  
C 1.744948 5.011977 1.765104  
C 1.877347 0.861611 -4.884657  
C 0.873744 -1.812355 -4.916242  
C -1.535630 -5.142959 -1.194200  
C -2.144875 -4.957069 1.590329  
C -1.262109 -1.154452 5.552018  
C -0.227126 1.507327 5.594355  
C 2.334164 4.831214 -1.023899  
C 2.563414 6.031615 -0.310963  
F 3.058659 7.093588 -0.944830  
C 2.272338 6.121108 1.062820  
C 1.817431 0.124467 -6.090240  
C 1.327619 -1.194736 -6.104488  
F 1.279750 -1.861238 -7.256611  
C -2.169662 -6.211702 -0.518251



|   |           |           |           |
|---|-----------|-----------|-----------|
| C | -2.469767 | -6.120156 | 0.853409  |
| F | -3.067587 | -7.144151 | 1.461038  |
| C | -0.697711 | 0.894333  | 6.779107  |
| F | -0.660302 | 1.563210  | 7.930688  |
| C | -1.206710 | -0.417396 | 6.758547  |
| F | 2.624328  | 4.797351  | -2.322298 |
| F | 1.486414  | 5.144840  | 3.063643  |
| F | 2.344830  | 2.107178  | -4.920781 |
| F | 0.394988  | -3.050905 | -4.985305 |
| F | -1.270372 | -5.278019 | -2.491267 |
| F | -2.446688 | -4.919059 | 2.885943  |
| F | 2.231908  | 0.679724  | -7.227767 |
| F | 2.495571  | 7.266975  | 1.704798  |
| F | -2.487843 | -7.320967 | -1.184292 |
| F | -1.753563 | -2.390779 | 5.583864  |
| F | -1.641540 | -0.967180 | 7.891458  |
| F | 0.243882  | 2.749986  | 5.664361  |
| S | -1.494195 | 2.087477  | -3.994180 |
| C | -1.754780 | 0.567203  | -4.679625 |
| N | -1.915558 | -0.487558 | -5.189894 |

### **F-Stage V**

E= -5617.3563697

G= -5617.157999

N -1.552341 0.693026 -0.321271

C -2.165298 1.248608 -1.168039

S -3.031071 2.024213 -2.366134

Co 0.173597 -0.089061 0.301213

C -1.037528 -2.594867 1.355547

C -1.500635 -3.912264 0.922849

C -1.202265 -4.002628 -0.459551

C -0.563554 -2.739690 -0.823920

N -0.484417 -1.915157 0.283511

C 0.098318 1.088946 3.029588

C -0.301504 0.782905 4.400947

C -0.817876 -0.536697 4.378873

C -0.720409 -0.990175 2.992551

N -0.150791 0.000191 2.211818

C 1.459193 2.378959 -0.732740

C 1.830079 3.732012 -0.323534

C 1.531988 3.823747 1.058882

C 0.988101 2.524434 1.447998

N 0.960174 1.678857 0.352874

C 0.452624 -1.356380 -2.376623

C 0.913699 -1.074543 -3.733380  
C 1.412361 0.251925 -3.716640  
C 1.263683 0.728449 -2.342449  
N 0.704249 -0.266233 -1.559905  
N -0.134760 -2.497102 -2.053576  
N -1.148126 -2.183782 2.609064  
N 0.604704 2.263755 2.688266  
N 1.612390 1.952030 -1.976629  
C 1.770245 5.002628 1.769969  
C 1.850629 0.870677 -4.891851  
C 0.850193 -1.804487 -4.922531  
C -1.509269 -5.153964 -1.188834  
C -2.111554 -4.972740 1.597370  
C -1.290441 -1.143109 5.545928  
C -0.256331 1.519022 5.587793  
C 2.366641 4.820016 -1.017308  
C 2.605531 6.016995 -0.302137  
F 3.114050 7.074786 -0.932709  
C 2.310803 6.107398 1.070831  
C 1.784105 0.135634 -6.098540  
C 1.295979 -1.184160 -6.112428  
F 1.241799 -1.848508 -7.265561  
C -2.129730 -6.229059 -0.510304

|   |           |           |           |
|---|-----------|-----------|-----------|
| C | -2.426413 | -6.139727 | 0.862194  |
| F | -3.011611 | -7.169471 | 1.472427  |
| C | -0.734815 | 0.909319  | 6.770956  |
| F | -0.705409 | 1.581416  | 7.920958  |
| C | -1.243409 | -0.402599 | 6.750618  |
| F | 2.660750  | 4.784702  | -2.314853 |
| F | 1.508645  | 5.136753  | 3.067905  |
| F | 2.316328  | 2.116962  | -4.928800 |
| F | 0.372846  | -3.043589 | -4.990644 |
| F | -1.247065 | -5.286905 | -2.486779 |
| F | -2.409610 | -4.937332 | 2.893954  |
| F | 2.190604  | 0.693796  | -7.237479 |
| F | 2.543137  | 7.250121  | 1.715235  |
| F | -2.438156 | -7.342010 | -1.174760 |
| F | -1.781680 | -2.379612 | 5.578074  |
| F | -1.686111 | -0.949087 | 7.882141  |
| F | 0.214459  | 2.761872  | 5.657505  |
| S | -1.501554 | 2.093815  | -3.987814 |
| C | -1.770744 | 0.575260  | -4.674735 |
| N | -1.937424 | -0.478290 | -5.185383 |

### **NO<sub>2</sub>-Stage I**

E= -4357.7479384

G= -4357.404352

N -1.481128 0.692726 -0.548522

C -1.701718 1.873804 -0.749677

S -2.133959 3.384626 -1.053894

Co 0.112051 -0.089138 0.038203

C -0.217781 1.207847 2.696036

C -0.783379 0.977843 4.021047

C -1.327406 -0.329004 3.996254

C -1.079007 -0.857239 2.656900

N -0.387451 0.081422 1.905052

C 1.523081 2.315057 -0.971848

C 1.826055 3.691560 -0.601534

C 1.410435 3.840717 0.744035

C 0.864312 2.552402 1.156193

N 0.966208 1.642939 0.110101

C 0.553590 -1.454150 -2.566292

C 1.120528 -1.226349 -3.891439

C 1.659354 0.082701 -3.872424

C 1.406687 0.615134 -2.536401

N 0.761651 -0.340428 -1.764463

C -1.245896 -2.538392 1.074766

C -1.651416 -3.881550 0.671784  
C -1.223385 -4.037288 -0.668904  
C -0.574178 -2.783309 -1.044281  
N -0.592840 -1.906294 0.028258  
N -1.479614 -2.061689 2.287635  
N 0.347251 2.355446 2.356143  
N 1.751958 1.841892 -2.186188  
N -0.055299 -2.584579 -2.244006  
C 2.282810 0.636499 -4.995061  
C -1.433680 -5.227295 -1.372600  
C -2.310976 -4.915538 1.357965  
C -1.958070 -0.882425 5.115037  
C -0.852273 1.781920 5.171577  
C 1.525046 5.062326 1.416428  
C 2.377192 4.764120 -1.324546  
C 1.188585 -2.032852 -5.040451  
C 1.808697 -1.495297 -6.174841  
H 1.892420 -2.073698 -7.104332  
C 2.338394 -0.184487 -6.131694  
C -2.093576 -6.246680 -0.669095  
C -2.532650 -6.114096 0.668686  
H -3.041186 -6.960028 1.149416  
C -2.016397 -0.063135 6.252827

|   |           |           |           |
|---|-----------|-----------|-----------|
| C | -1.481184 | 1.245162  | 6.301578  |
| H | -1.568730 | 1.822712  | 7.231242  |
| C | 2.495700  | 5.995056  | -0.669304 |
| H | 2.910339  | 6.873490  | -1.180980 |
| C | 2.071154  | 6.120060  | 0.674749  |
| H | 0.770294  | -3.049118 | -5.053817 |
| H | 2.705140  | 1.649518  | -5.002948 |
| H | -1.105719 | -5.371473 | -2.410025 |
| H | -2.640571 | -4.794238 | 2.399486  |
| H | -2.385802 | -1.893195 | 5.118559  |
| H | -0.430388 | 2.796658  | 5.188709  |
| H | 1.202715  | 5.201521  | 2.456246  |
| H | 2.695650  | 4.647567  | -2.369973 |
| N | -2.671780 | -0.597911 | 7.462166  |
| O | -2.717881 | 0.122535  | 8.466976  |
| O | -3.142624 | -1.741247 | 7.411259  |
| N | -2.335098 | -7.526616 | -1.362714 |
| O | -2.908566 | -8.428558 | -0.739260 |
| O | -1.950488 | -7.635185 | -2.533994 |
| N | 2.983831  | 0.351179  | -7.345828 |
| O | 3.446355  | 1.498178  | -7.300908 |
| O | 3.030931  | -0.372369 | -8.348394 |
| N | 2.201823  | 7.435682  | 1.331244  |

O 1.826518 7.539494 2.505853

O 2.678912 8.369455 0.674664

## **NO<sub>2</sub>-Stage II**

E= -4357.5391735

G= -4357.197810

N -1.479280 0.682391 -0.538256

C -1.917536 1.770596 -0.205541

S -2.605898 3.168228 0.148305

Co 0.134969 -0.089530 0.019368

C -0.167264 1.205100 2.673097

C -0.726979 0.974520 4.007113

C -1.291424 -0.319893 3.977650

C -1.056479 -0.845048 2.631423

N -0.353592 0.085207 1.878032

C 1.510102 2.318925 -1.010640

C 1.794295 3.709888 -0.651024

C 1.401068 3.856400 0.697812

C 0.883640 2.555736 1.121670

N 0.977738 1.643637 0.079497



C 0.583874 -1.463402 -2.578112  
C 1.180115 -1.250294 -3.900229  
C 1.713061 0.057795 -3.885115  
C 1.425690 0.604969 -2.558201  
N 0.772338 -0.341849 -1.785760  
C -1.247345 -2.517575 1.047266  
C -1.679506 -3.857520 0.639186  
C -1.245674 -4.019559 -0.695389  
C -0.568357 -2.774409 -1.063755  
N -0.577677 -1.896309 0.007113  
N -1.477848 -2.041894 2.260290  
N 0.395047 2.353082 2.333723  
N 1.748573 1.842552 -2.220368  
N -0.034095 -2.588759 -2.259855  
C 2.356757 0.603804 -4.996294  
C -1.472301 -5.199650 -1.404749  
C -2.362747 -4.871309 1.321217  
C -1.928967 -0.870043 5.090538  
C -0.777517 1.776545 5.153329  
C 1.505708 5.076549 1.367607  
C 2.313803 4.780720 -1.388609  
C 1.270088 -2.070433 -5.031176  
C 1.916254 -1.540664 -6.163335

H 2.020187 -2.131085 -7.083374  
C 2.439087 -0.234041 -6.123612  
C -2.160908 -6.207512 -0.704731  
C -2.605303 -6.069086 0.623760  
H -3.135622 -6.903813 1.100847  
C -1.969630 -0.051554 6.234087  
C -1.415027 1.241401 6.287725  
H -1.489842 1.817981 7.219272  
C 2.422423 6.021753 -0.735193  
H 2.813080 6.904323 -1.258864  
C 2.021924 6.142922 0.609320  
H 0.854037 -3.087394 -5.042689  
H 2.774805 1.618621 -5.007803  
H -1.139545 -5.348907 -2.439969  
H -2.697414 -4.745479 2.360335  
H -2.375445 -1.872729 5.090128  
H -0.341130 2.784818 5.173355  
H 1.200637 5.213225 2.412997  
H 2.617406 4.666432 -2.438493  
N -2.634991 -0.582896 7.446492  
O -2.664581 0.133687 8.451653  
O -3.123509 -1.715891 7.383689  
N -2.425420 -7.485195 -1.405932

O -3.020184 -8.373151 -0.787196  
O -2.033907 -7.591980 -2.572913  
N 3.111534 0.292404 -7.333976  
O 3.566627 1.440013 -7.284987  
O 3.180732 -0.442481 -8.323921  
N 2.142962 7.467229 1.262606  
O 1.785265 7.561031 2.441410  
O 2.592691 8.403244 0.594585

**NO<sub>2</sub>-Stage III-a**

E= -4357.3001181

G= -4356.961330

N -1.545346 0.707144 -0.586101

C -1.978354 1.846682 -0.629373

S -2.683385 3.268654 -0.744553

Co 0.032887 -0.050884 -0.000173

C -0.221009 1.217705 2.671824

C -0.755943 0.974373 4.012633

C -1.292380 -0.333153 3.994256

C -1.088420 -0.849468 2.642898

N -0.397878 0.103547 1.881749

C 1.484407 2.328638 -0.991205

C 1.788096 3.715953 -0.626456

C 1.379299 3.869128 0.716972

C 0.828085 2.583039 1.133343

N 0.912314 1.671261 0.074433

C 0.565895 -1.455940 -2.560315

C 1.159859 -1.237958 -3.881138

C 1.724857 0.057365 -3.854009

C 1.443032 0.607137 -2.531800

N 0.774793 -0.352326 -1.759532

C -1.308060 -2.497417 1.035712

C -1.720964 -3.847493 0.635714  
C -1.267340 -4.019782 -0.690761  
C -0.609821 -2.770484 -1.069071  
N -0.656563 -1.873756 -0.000117  
N -1.521797 -2.030704 2.262429  
N 0.330270 2.377974 2.333912  
N 1.755811 1.839921 -2.195826  
N -0.062118 -2.583919 -2.251891  
C 2.373715 0.603366 -4.963381  
C -1.460147 -5.213481 -1.387483  
C -2.387647 -4.863530 1.325449  
C -1.888659 -0.901374 5.121467  
C -0.788692 1.771477 5.161174  
C 1.502004 5.085013 1.391858  
C 2.346782 4.770872 -1.353114  
C 1.226442 -2.049357 -5.018266  
C 1.879084 -1.518689 -6.149041  
H 1.962859 -2.100481 -7.076808  
C 2.429658 -0.224821 -6.098816  
C -2.136614 -6.225769 -0.680210  
C -2.597582 -6.078245 0.638860  
H -3.116341 -6.916642 1.122548  
C -1.911341 -0.087040 6.268559

|   |           |           |           |
|---|-----------|-----------|-----------|
| C | -1.383205 | 1.216024  | 6.311660  |
| H | -1.442624 | 1.787392  | 7.247716  |
| C | 2.472369  | 6.011681  | -0.693412 |
| H | 2.890679  | 6.885286  | -1.211043 |
| C | 2.053934  | 6.140899  | 0.641933  |
| H | 0.787221  | -3.056197 | -5.039282 |
| H | 2.813774  | 1.609016  | -4.966151 |
| H | -1.110853 | -5.370126 | -2.416294 |
| H | -2.735710 | -4.732446 | 2.359384  |
| H | -2.312046 | -1.914135 | 5.130202  |
| H | -0.372462 | 2.788175  | 5.174224  |
| H | 1.187077  | 5.226321  | 2.433885  |
| H | 2.666008  | 4.651923  | -2.397725 |
| N | -2.526052 | -0.639516 | 7.501967  |
| O | -2.556799 | 0.081584  | 8.502106  |
| O | -2.969813 | -1.789944 | 7.451809  |
| N | -2.365618 | -7.520898 | -1.367461 |
| O | -2.942518 | -8.412363 | -0.739580 |
| O | -1.962705 | -7.629737 | -2.529224 |
| N | 3.106390  | 0.301396  | -7.311345 |
| O | 3.597441  | 1.431634  | -7.245112 |
| O | 3.137049  | -0.419648 | -8.311506 |
| N | 2.194273  | 7.463694  | 1.300632  |

O 1.822235 7.559187 2.473688

O 2.671778 8.388656 0.639017

**NO<sub>2</sub>-Stage III-b**

E= -4357.3126105

G= -4356.971812

N -1.497737 0.625729 -0.570286

C -1.849430 1.783433 -0.713644

S -2.487635 3.227341 -0.958102

Co 0.116335 -0.080414 0.038121

C -0.211787 1.218476 2.682775

C -0.708959 0.959785 4.040293

C -1.243487 -0.345605 4.019160

C -1.055373 -0.847543 2.656411

N -0.406819 0.105997 1.883781

C 1.495471 2.324764 -0.982833

C 1.757003 3.725091 -0.632027

C 1.325657 3.883345 0.702445

C 0.816512 2.579729 1.129816

N 0.945747 1.654117 0.101100

C 0.580036 -1.457506 -2.547029

C 1.203808 -1.253841 -3.860499

C 1.752413 0.045681 -3.837635

C 1.438819 0.602434 -2.519337

N 0.764541 -0.335633 -1.754314

C -1.263049 -2.508979 1.065789



C -1.728171 -3.837376 0.643278  
C -1.305873 -3.992092 -0.693894  
C -0.599751 -2.758059 -1.047909  
N -0.585567 -1.890750 0.030835  
N -1.472712 -2.047396 2.287224  
N 0.318150 2.379085 2.337557  
N 1.758119 1.841607 -2.183963  
N -0.056437 -2.575025 -2.241274  
C 2.417673 0.584941 -4.935982  
C -1.555667 -5.156414 -1.416769  
C -2.422730 -4.840961 1.319674  
C -1.814523 -0.927782 5.149317  
C -0.724412 1.746473 5.192486  
C 1.399923 5.109575 1.361618  
C 2.285568 4.786708 -1.369374  
C 1.298745 -2.077090 -4.984046  
C 1.973305 -1.553803 -6.111605  
H 2.082557 -2.147978 -7.028789  
C 2.508676 -0.259095 -6.063963  
C -2.262605 -6.161911 -0.721906  
C -2.694326 -6.031421 0.604886  
H -3.237998 -6.860143 1.077870  
C -1.817568 -0.123770 6.309132

C -1.295498 1.176546 6.354089  
H -1.335945 1.740306 7.295782  
C 2.362215 6.042427 -0.725641  
H 2.757368 6.921780 -1.251724  
C 1.925591 6.174832 0.600896  
H 0.867617 -3.087580 -5.002951  
H 2.845494 1.595916 -4.943788  
H -1.229169 -5.300988 -2.454874  
H -2.746384 -4.723661 2.363191  
H -2.238535 -1.940410 5.155239  
H -0.313585 2.765431 5.207662  
H 1.068431 5.255602 2.397895  
H 2.621608 4.663141 -2.408196  
N -2.408865 -0.691367 7.547473  
O -2.419418 0.016413 8.556918  
O -2.853915 -1.840858 7.489464  
N -2.555731 -7.428786 -1.439987  
O -3.157549 -8.312338 -0.825952  
O -2.175693 -7.519357 -2.610505  
N 3.208425 0.261840 -7.266859  
O 3.678294 1.401010 -7.201791  
O 3.277739 -0.471903 -8.255024  
N 2.013418 7.511726 1.242972

O 1.619187 7.609655 2.408181

O 2.472025 8.441290 0.575582

### **NO<sub>2</sub>-Stage IV**

E= -4848.4187541

G= -4848.074943

N -1.909194 0.536502 -0.491500

C -2.705232 0.494122 -1.364939

S -3.827655 0.435569 -2.605262

Co -0.097795 0.048455 0.213689

C -0.398959 1.255209 2.914349

C -0.888677 0.950941 4.263166

C -1.300967 -0.400351 4.234775

C -1.057134 -0.877031 2.870428

N -0.510821 0.138396 2.104202

C 1.127532 2.570190 -0.771105

C 1.486685 3.924151 -0.335579

C 1.108815 4.011824 1.023104

C 0.534047 2.710461 1.376465

N 0.564728 1.865633 0.279602

C 0.335925 -1.199772 -2.447162

C 0.777382 -0.877966 -3.808286  
C 1.236489 0.457628 -3.767813  
C 1.041818 0.919439 -2.391026  
N 0.511718 -0.102780 -1.620710  
C -1.125002 -2.536341 1.258466  
C -1.457795 -3.899363 0.830139  
C -1.111149 -3.975883 -0.537578  
C -0.573434 -2.661795 -0.901661  
N -0.584177 -1.824249 0.200300  
N -1.348028 -2.112913 2.492973  
N 0.077319 2.448200 2.591300  
N 1.338903 2.151599 -2.009936  
N -0.159022 -2.385626 -2.128632  
C 1.695532 1.110666 -4.911564  
C -1.306040 -5.139715 -1.281258  
C -2.013238 -4.988769 1.511766  
C -1.822981 -1.033092 5.363274  
C -0.983205 1.726556 5.424660  
C 1.309438 5.174120 1.767932  
C 2.081883 4.999091 -1.006312  
C 0.745745 -1.612278 -5.000935  
C 1.193890 -0.968426 -6.168328  
H 1.187182 -1.484583 -7.137313

C 1.657580 0.359003 -6.100371  
C -1.867065 -6.224607 -0.581114  
C -2.218802 -6.173495 0.780991  
H -2.652917 -7.063154 1.256058  
C -1.912620 -0.238540 6.521919  
C -1.509982 1.109456 6.574225  
H -1.613164 1.662980 7.516915  
C 2.293214 6.182020 -0.274359  
H 2.756215 7.061293 -0.741412  
C 1.908478 6.245292 1.078297  
H 0.377354 -2.647121 -5.032551  
H 2.046450 2.150231 -4.905732  
H -1.046665 -5.220623 -2.344694  
H -2.283308 -4.928067 2.575291  
H -2.148316 -2.081266 5.364310  
H -0.661812 2.777172 5.445479  
H 1.024796 5.264619 2.824096  
H 2.375753 4.929423 -2.062942  
N -2.462156 -0.856025 7.749221  
O -2.544894 -0.156193 8.763952  
O -2.809500 -2.040941 7.692045  
N -2.097528 -7.485591 -1.320707  
O -2.584349 -8.439366 -0.704698

|   |           |           |           |
|---|-----------|-----------|-----------|
| O | -1.789263 | -7.515495 | -2.517333 |
| N | 2.114290  | 1.008082  | -7.348904 |
| O | 2.515153  | 2.175120  | -7.277871 |
| O | 2.070504  | 0.350794  | -8.393974 |
| N | 2.144034  | 7.504665  | 1.818687  |
| O | 1.801581  | 7.547322  | 3.005642  |
| O | 2.669219  | 8.444791  | 1.213176  |
| S | -2.609164 | -0.532400 | -4.176843 |
| C | -1.889180 | 0.842927  | -4.846183 |
| N | -1.376610 | 1.782398  | -5.347910 |

**NO<sub>2</sub>-Stage V**

E= -4848.4148221

G= -4848.066969

N -1.637253 0.429640 -0.459341

C -2.551545 0.520807 -1.192927

S -3.783339 0.616949 -2.325734

Co -0.023356 0.004865 0.210872

C -0.435114 1.254560 2.874728

C -1.002730 0.976797 4.191425

C -1.364495 -0.391248 4.187217

C -1.033035 -0.905490 2.862317

N -0.460514 0.115090 2.097645

C 1.234586 2.515476 -0.767820

C 1.607488 3.857702 -0.328728

C 1.200329 3.960622 1.022522

C 0.586408 2.683332 1.371192

N 0.653923 1.821352 0.274276

C 0.337538 -1.223421 -2.462839

C 0.683768 -0.869631 -3.834309

C 1.215584 0.441244 -3.785771

C 1.121143 0.877337 -2.397686

N 0.608514 -0.163778 -1.619377

C -1.017260 -2.586140 1.272075

C -1.321812 -3.952301 0.855148  
C -0.977886 -4.035779 -0.515136  
C -0.477705 -2.721103 -0.900120  
N -0.469794 -1.882006 0.220229  
N -1.275618 -2.146598 2.498624  
N 0.063185 2.443041 2.554951  
N 1.444985 2.092362 -2.008114  
N -0.137403 -2.419512 -2.134172  
C 1.616418 1.114158 -4.944240  
C -1.158526 -5.213425 -1.248134  
C -1.853132 -5.050612 1.549457  
C -1.944943 -1.001380 5.304027  
C -1.197614 1.787279 5.320755  
C 1.412200 5.125369 1.767298  
C 2.251442 4.916789 -0.987238  
C 0.512771 -1.551564 -5.051219  
C 0.891563 -0.883498 -6.224456  
H 0.770403 -1.354601 -7.208775  
C 1.437727 0.416625 -6.148205  
C -1.693922 -6.297652 -0.537100  
C -2.039549 -6.240080 0.831917  
H -2.456511 -7.133660 1.314859  
C -2.141375 -0.171707 6.418195



|   |           |           |           |
|---|-----------|-----------|-----------|
| C | -1.782057 | 1.194439  | 6.448344  |
| H | -1.971543 | 1.775554  | 7.360541  |
| C | 2.475157  | 6.091606  | -0.256045 |
| H | 2.972786  | 6.957231  | -0.712802 |
| C | 2.055376  | 6.172726  | 1.090563  |
| H | 0.087931  | -2.564369 | -5.088609 |
| H | 2.023016  | 2.133168  | -4.930601 |
| H | -0.903854 | -5.298483 | -2.312331 |
| H | -2.119659 | -4.984685 | 2.613531  |
| H | -2.236014 | -2.059424 | 5.322271  |
| H | -0.912601 | 2.848554  | 5.323928  |
| H | 1.104228  | 5.227483  | 2.815782  |
| H | 2.570346  | 4.834125  | -2.035609 |
| N | -2.761157 | -0.760664 | 7.624094  |
| O | -2.922686 | -0.031281 | 8.608980  |
| O | -3.087201 | -1.952713 | 7.583812  |
| N | -1.906384 | -7.568598 | -1.262028 |
| O | -2.375711 | -8.524049 | -0.633651 |
| O | -1.603094 | -7.609056 | -2.460066 |
| N | 1.828591  | 1.088264  | -7.405524 |
| O | 2.314570  | 2.222442  | -7.328259 |
| O | 1.649164  | 0.481535  | -8.467266 |
| N | 2.308959  | 7.427235  | 1.830425  |

O 1.936756 7.489921 3.007925

O 2.879497 8.347812 1.234507

S -2.682204 -0.268790 -4.018174

C -1.916020 1.121946 -4.599277

N -1.369883 2.074384 -5.036355
